# Supplementary material for: Point Mutations at a Key Site Alter the Cytochrome P450 OleP Structural Dynamics
Source: MDPI journal article supplement (doi:10.3390/biom12010055), 2021-12-31
Supplement: s1 [file s1]

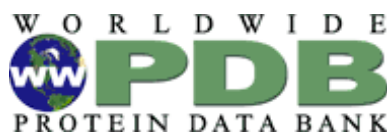

# Preliminary Full wwPDB X-ray Structure Validation Report ⓘ

Dec 16, 2021 – 08:46 pm GMT

Deposition ID : D\_1292119176

This is a Preliminary Full wwPDB X-ray Structure Validation Report.

This report is produced by the wwPDB Deposition System during initial deposition but before annotation of the structure.

We welcome your comments at [validation@mail.wwpdb.org](mailto:validation@mail.wwpdb.org)

A user guide is available at

<https://www.wwpdb.org/validation/2017/XrayValidationReportHelp>

with specific help available everywhere you see the ⓘ symbol.

---

The following versions of software and data (see [references ⓘ](#)) were used in the production of this report:

|                                |   |                                                                    |
|--------------------------------|---|--------------------------------------------------------------------|
| MolProbity                     | : | 4.02b-467                                                          |
| Mogul                          | : | 1.8.4, CSD as541be (2020)                                          |
| Xtriage (Phenix)               | : | 1.13                                                               |
| EDS                            | : | 2.24                                                               |
| buster-report                  | : | 1.1.7 (2018)                                                       |
| Percentile statistics          | : | 20191225.v01 (using entries in the PDB archive December 25th 2019) |
| Refmac                         | : | 5.8.0267                                                           |
| CCP4                           | : | 7.1.010 (Gargrove)                                                 |
| Ideal geometry (proteins)      | : | Engh & Huber (2001)                                                |
| Ideal geometry (DNA, RNA)      | : | Parkinson et al. (1996)                                            |
| Validation Pipeline (wwPDB-VP) | : | 2.24                                                               |

# 1 Overall quality at a glance

The following experimental techniques were used to determine the structure:

*X-RAY DIFFRACTION*

The reported resolution of this entry is 2.08 Å.

Percentile scores (ranging between 0-100) for global validation metrics of the entry are shown in the following graphic. The table shows the number of entries on which the scores are based.

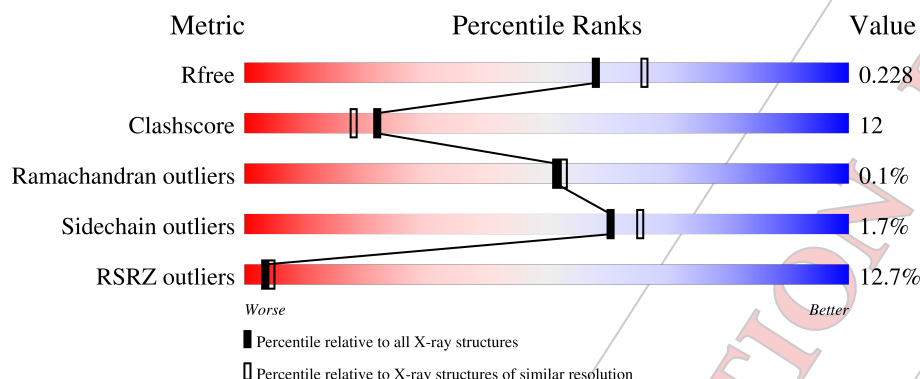

| Metric                | Whole archive<br>(#Entries) | Similar resolution<br>(#Entries, resolution range(Å)) |
|-----------------------|-----------------------------|-------------------------------------------------------|
| $R_{free}$            | 130704                      | 6189 (2.10-2.06)                                      |
| Clashscore            | 141614                      | 6738 (2.10-2.06)                                      |
| Ramachandran outliers | 138981                      | 6663 (2.10-2.06)                                      |
| Sidechain outliers    | 138945                      | 6664 (2.10-2.06)                                      |
| RSRZ outliers         | 127900                      | 6057 (2.10-2.06)                                      |

The table below summarises the geometric issues observed across the polymeric chains and their fit to the electron density. The red, orange, yellow and green segments of the lower bar indicate the fraction of residues that contain outliers for  $\geq 3$ , 2, 1 and 0 types of geometric quality criteria respectively. A grey segment represents the fraction of residues that are not modelled. The numeric value for each fraction is indicated below the corresponding segment, with a dot representing fractions  $\leq 5\%$ . The upper red bar (where present) indicates the fraction of residues that have poor fit to the electron density. The numeric value is given above the bar.

| Mol | Chain | Length | Quality of chain                                          |
|-----|-------|--------|-----------------------------------------------------------|
| 1   | A     | 396    | <div> <div>7%</div> <div>80%</div> <div>18%</div> </div>  |
| 1   | D     | 396    | <div> <div>10%</div> <div>77%</div> <div>23%</div> </div> |
| 1   | F     | 396    | <div> <div>26%</div> <div>80%</div> <div>19%</div> </div> |
| 2   | B     | 402    | <div> <div>7%</div> <div>83%</div> <div>16%</div> </div>  |
| 3   | C     | 408    | <div> <div>4%</div> <div>88%</div> <div>12%</div> </div>  |

Continued on next page...

Continued from previous page...

| Mol | Chain | Length | Quality of chain |
|-----|-------|--------|------------------|
| 4   | E     | 395    |                  |

The following table lists non-polymeric compounds, carbohydrate monomers and non-standard residues in protein, DNA, RNA chains that are outliers for geometric or electron-density-fit criteria:

| Mol | Type | Chain | Res  | Chirality | Geometry | Clashes | Electron density |
|-----|------|-------|------|-----------|----------|---------|------------------|
| 7   | FMT  | H     | 1004 | -         | -        | -       | X                |
| 7   | FMT  | H     | 1005 | -         | -        | -       | X                |
| 7   | FMT  | H     | 1020 | -         | -        | -       | X                |
| 7   | FMT  | H     | 1021 | -         | -        | -       | X                |
| 7   | FMT  | H     | 1024 | -         | -        | X       | -                |
| 7   | FMT  | H     | 1036 | -         | -        | -       | X                |
| 7   | FMT  | H     | 1040 | -         | -        | X       | -                |
| 7   | FMT  | H     | 1060 | -         | -        | X       | -                |
| 7   | FMT  | H     | 1061 | -         | -        | X       | -                |
| 7   | FMT  | H     | 19   | -         | -        | X       | -                |
| 7   | FMT  | H     | 31   | -         | -        | X       | -                |
| 7   | FMT  | H     | 33   | -         | -        | X       | -                |
| 7   | FMT  | H     | 57   | -         | -        | -       | X                |
| 7   | FMT  | H     | 62   | -         | -        | -       | X                |
| 7   | FMT  | H     | 66   | -         | -        | X       | -                |
| 7   | FMT  | H     | 71   | -         | -        | X       | -                |
| 7   | FMT  | H     | 72   | -         | -        | -       | X                |
| 7   | FMT  | H     | 902  | -         | -        | X       | -                |
| 7   | FMT  | H     | 917  | -         | -        | -       | X                |
| 7   | FMT  | H     | 928  | -         | -        | -       | X                |
| 7   | FMT  | H     | 929  | -         | -        | -       | X                |
| 7   | FMT  | H     | 940  | -         | -        | -       | X                |
| 7   | FMT  | H     | 950  | -         | -        | X       | -                |
| 7   | FMT  | H     | 951  | -         | -        | X       | -                |
| 7   | FMT  | H     | 960  | -         | -        | X       | -                |
| 7   | FMT  | H     | 970  | -         | -        | X       | -                |
| 7   | FMT  | H     | 976  | -         | -        | -       | X                |
| 7   | FMT  | H     | 984  | -         | -        | -       | X                |
| 7   | FMT  | H     | 998  | -         | -        | -       | X                |
| 9   | GOL  | K     | 11   | -         | -        | -       | X                |
| 9   | GOL  | K     | 4[A] | -         | -        | X       | -                |
| 9   | GOL  | K     | 5    | -         | -        | -       | X                |
| 9   | GOL  | K     | 7[A] | -         | -        | X       | -                |
| 9   | GOL  | K     | 7[B] | -         | -        | X       | -                |

## 2 Entry composition [i](#)

There are 10 unique types of molecules in this entry. The entry contains 21704 atoms, of which 0 are hydrogens and 0 are deuteriums.

In the tables below, the ZeroOcc column contains the number of atoms modelled with zero occupancy, the AltConf column contains the number of residues with at least one atom in alternate conformation and the Trace column contains the number of residues modelled with at most 2 atoms.

- Molecule 1 is a protein called Cytochrome P-450.

| Mol | Chain | Residues | Atoms |      |     |     |    | ZeroOcc | AltConf | Trace |
|-----|-------|----------|-------|------|-----|-----|----|---------|---------|-------|
| 1   | A     | 396      | Total | C    | N   | O   | S  | 0       | 32      | 0     |
|     |       |          | 3298  | 2092 | 595 | 596 | 15 |         |         |       |
| 1   | D     | 396      | Total | C    | N   | O   | S  | 0       | 16      | 0     |
|     |       |          | 3186  | 2018 | 564 | 589 | 15 |         |         |       |
| 1   | F     | 396      | Total | C    | N   | O   | S  | 0       | 6       | 0     |
|     |       |          | 3132  | 1976 | 556 | 584 | 16 |         |         |       |

There are 6 discrepancies between the modelled and reference sequences:

| Chain | Residue | Modelled | Actual | Comment             | Reference  |
|-------|---------|----------|--------|---------------------|------------|
| A     | 0       | HIS      | -      | expression tag      | UNP Q59819 |
| A     | 92      | TRP      | GLY    | engineered mutation | UNP Q59819 |
| D     | 0       | HIS      | -      | expression tag      | UNP Q59819 |
| D     | 92      | TRP      | GLY    | engineered mutation | UNP Q59819 |
| F     | 0       | HIS      | -      | expression tag      | UNP Q59819 |
| F     | 92      | TRP      | GLY    | engineered mutation | UNP Q59819 |

- Molecule 2 is a protein called Cytochrome P-450.

| Mol | Chain | Residues | Atoms |      |     |     |    | ZeroOcc | AltConf | Trace |
|-----|-------|----------|-------|------|-----|-----|----|---------|---------|-------|
| 2   | B     | 402      | Total | C    | N   | O   | S  | 0       | 33      | 0     |
|     |       |          | 3331  | 2113 | 597 | 606 | 15 |         |         |       |

There are 2 discrepancies between the modelled and reference sequences:

| Chain | Residue | Modelled | Actual | Comment             | Reference  |
|-------|---------|----------|--------|---------------------|------------|
| B     | 0       | HIS      | -      | expression tag      | UNP Q59819 |
| B     | 92      | TRP      | GLY    | engineered mutation | UNP Q59819 |

- Molecule 3 is a protein called Cytochrome P-450.

| Mol | Chain | Residues | Atoms |      |     |     |    | ZeroOcc | AltConf | Trace |
|-----|-------|----------|-------|------|-----|-----|----|---------|---------|-------|
| 3   | C     | 408      | Total | C    | N   | O   | S  | 0       | 29      | 0     |
|     |       |          | 3354  | 2128 | 598 | 611 | 17 |         |         |       |

There are 2 discrepancies between the modelled and reference sequences:

| Chain | Residue | Modelled | Actual | Comment             | Reference  |
|-------|---------|----------|--------|---------------------|------------|
| C     | 0       | HIS      | -      | expression tag      | UNP Q59819 |
| C     | 92      | TRP      | GLY    | engineered mutation | UNP Q59819 |

- Molecule 4 is a protein called Cytochrome P-450.

| Mol | Chain | Residues | Atoms |      |     |     |    | ZeroOcc | AltConf | Trace |
|-----|-------|----------|-------|------|-----|-----|----|---------|---------|-------|
| 4   | E     | 395      | Total | C    | N   | O   | S  | 0       | 9       | 0     |
|     |       |          | 3141  | 1985 | 558 | 580 | 18 |         |         |       |

There are 2 discrepancies between the modelled and reference sequences:

| Chain | Residue | Modelled | Actual | Comment             | Reference  |
|-------|---------|----------|--------|---------------------|------------|
| E     | 0       | HIS      | -      | expression tag      | UNP Q59819 |
| E     | 92      | TRP      | GLY    | engineered mutation | UNP Q59819 |

- Molecule 5 is PROTOPORPHYRIN IX CONTAINING FE (three-letter code: HEM) (formula:  $C_{34}H_{32}FeN_4O_4$ ).

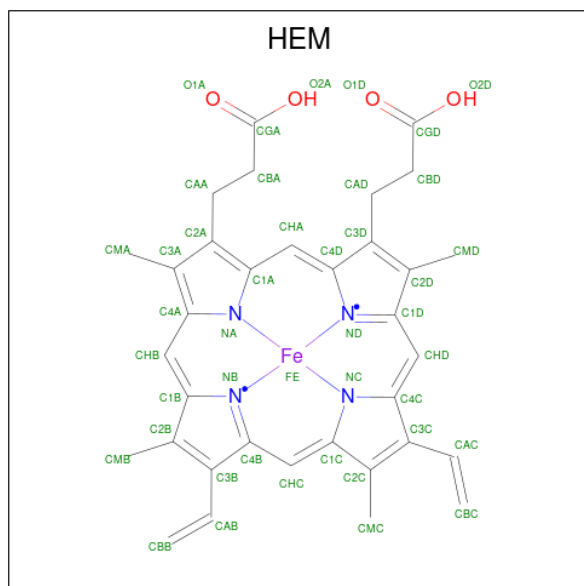

| Mol | Chain | Residues | Atoms |    |    |   |   | ZeroOcc | AltConf |
|-----|-------|----------|-------|----|----|---|---|---------|---------|
| 5   | A     | 1        | Total | C  | Fe | N | O | 0       | 0       |
|     |       |          | 43    | 34 | 1  | 4 | 4 |         |         |

Continued on next page...

Continued from previous page...

| Mol | Chain | Residues | Atoms |    |    |   |   | ZeroOcc | AltConf |
|-----|-------|----------|-------|----|----|---|---|---------|---------|
| 5   | B     | 1        | Total | C  | Fe | N | O | 0       | 0       |
|     |       |          | 43    | 34 | 1  | 4 | 4 |         |         |
| 5   | C     | 1        | Total | C  | Fe | N | O | 0       | 0       |
|     |       |          | 43    | 34 | 1  | 4 | 4 |         |         |
| 5   | D     | 1        | Total | C  | Fe | N | O | 0       | 0       |
|     |       |          | 43    | 34 | 1  | 4 | 4 |         |         |
| 5   | E     | 1        | Total | C  | Fe | N | O | 0       | 0       |
|     |       |          | 43    | 34 | 1  | 4 | 4 |         |         |
| 5   | F     | 1        | Total | C  | Fe | N | O | 0       | 0       |
|     |       |          | 43    | 34 | 1  | 4 | 4 |         |         |

- Molecule 6 is 6-DEOXYERYTHRONOLIDE B (three-letter code: DEB) (formula:  $C_{21}H_{38}O_6$ ).

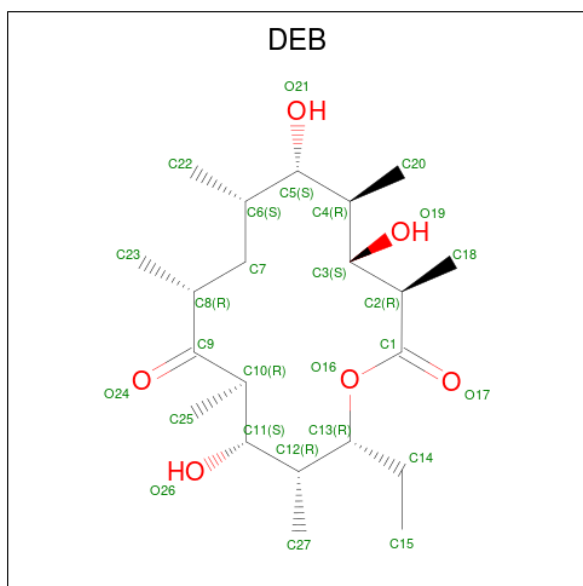

| Mol | Chain | Residues | Atoms |    |   | ZeroOcc | AltConf |
|-----|-------|----------|-------|----|---|---------|---------|
| 6   | A     | 1        | Total | C  | O | 0       | 0       |
|     |       |          | 27    | 21 | 6 |         |         |
| 6   | B     | 1        | Total | C  | O | 0       | 0       |
|     |       |          | 27    | 21 | 6 |         |         |
| 6   | D     | 1        | Total | C  | O | 0       | 0       |
|     |       |          | 27    | 21 | 6 |         |         |
| 6   | E     | 1        | Total | C  | O | 0       | 0       |
|     |       |          | 27    | 21 | 6 |         |         |
| 6   | F     | 1        | Total | C  | O | 0       | 0       |
|     |       |          | 27    | 21 | 6 |         |         |
| 6   | Z     | 1        | Total | C  | O | 0       | 0       |
|     |       |          | 27    | 21 | 6 |         |         |

- Molecule 7 is FORMIC ACID (three-letter code: FMT) (formula:  $\text{CH}_2\text{O}_2$ ).

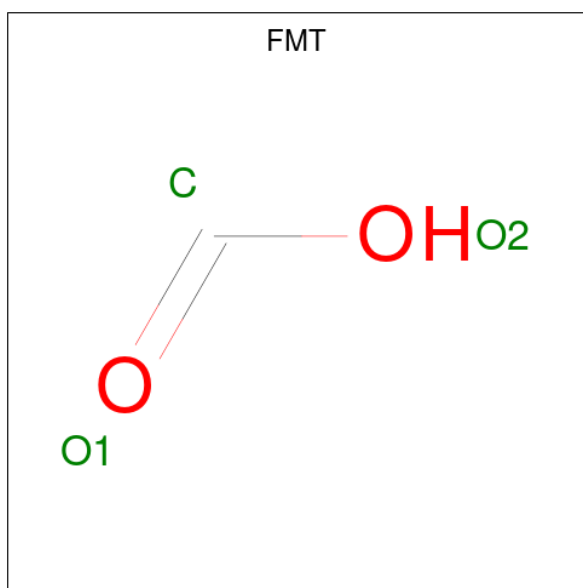

| Mol | Chain | Residues | Atoms |   |   | ZeroOcc | AltConf |
|-----|-------|----------|-------|---|---|---------|---------|
| 7   | H     | 1        | Total | C | O | 0       | 0       |
|     |       |          | 3     | 1 | 2 |         |         |
| 7   | H     | 1        | Total | C | O | 0       | 0       |
|     |       |          | 3     | 1 | 2 |         |         |
| 7   | H     | 1        | Total | C | O | 0       | 0       |
|     |       |          | 3     | 1 | 2 |         |         |
| 7   | H     | 1        | Total | C | O | 0       | 0       |
|     |       |          | 3     | 1 | 2 |         |         |
| 7   | H     | 1        | Total | C | O | 0       | 0       |
|     |       |          | 3     | 1 | 2 |         |         |
| 7   | H     | 1        | Total | C | O | 0       | 0       |
|     |       |          | 3     | 1 | 2 |         |         |
| 7   | H     | 1        | Total | C | O | 0       | 0       |
|     |       |          | 3     | 1 | 2 |         |         |
| 7   | H     | 1        | Total | C | O | 0       | 0       |
|     |       |          | 3     | 1 | 2 |         |         |
| 7   | H     | 1        | Total | C | O | 0       | 0       |
|     |       |          | 3     | 1 | 2 |         |         |

Continued on next page...

Continued from previous page...

| Mol | Chain | Residues | Atoms |   |   | ZeroOcc | AltConf |
|-----|-------|----------|-------|---|---|---------|---------|
| 7   | H     | 1        | Total | C | O | 0       | 0       |
|     |       |          | 3     | 1 | 2 |         |         |
| 7   | H     | 1        | Total | C | O | 0       | 0       |
|     |       |          | 3     | 1 | 2 |         |         |
| 7   | H     | 1        | Total | C | O | 0       | 0       |
|     |       |          | 3     | 1 | 2 |         |         |
| 7   | H     | 1        | Total | C | O | 0       | 0       |
|     |       |          | 3     | 1 | 2 |         |         |
| 7   | H     | 1        | Total | C | O | 0       | 0       |
|     |       |          | 3     | 1 | 2 |         |         |
| 7   | H     | 1        | Total | C | O | 0       | 0       |
|     |       |          | 3     | 1 | 2 |         |         |
| 7   | H     | 1        | Total | C | O | 0       | 0       |
|     |       |          | 3     | 1 | 2 |         |         |
| 7   | H     | 1        | Total | C | O | 0       | 0       |
|     |       |          | 3     | 1 | 2 |         |         |
| 7   | H     | 1        | Total | C | O | 0       | 0       |
|     |       |          | 3     | 1 | 2 |         |         |
| 7   | H     | 1        | Total | C | O | 0       | 0       |
|     |       |          | 3     | 1 | 2 |         |         |
| 7   | H     | 1        | Total | C | O | 0       | 0       |
|     |       |          | 3     | 1 | 2 |         |         |
| 7   | H     | 1        | Total | C | O | 0       | 0       |
|     |       |          | 3     | 1 | 2 |         |         |
| 7   | H     | 1        | Total | C | O | 0       | 0       |
|     |       |          | 3     | 1 | 2 |         |         |
| 7   | H     | 1        | Total | C | O | 0       | 0       |
|     |       |          | 3     | 1 | 2 |         |         |
| 7   | H     | 1        | Total | C | O | 0       | 0       |
|     |       |          | 3     | 1 | 2 |         |         |
| 7   | H     | 1        | Total | C | O | 0       | 0       |
|     |       |          | 3     | 1 | 2 |         |         |
| 7   | H     | 1        | Total | C | O | 0       | 0       |
|     |       |          | 3     | 1 | 2 |         |         |

Continued on next page...



Continued from previous page...

| Mol | Chain | Residues | Atoms |   |   | ZeroOcc | AltConf |
|-----|-------|----------|-------|---|---|---------|---------|
| 7   | H     | 1        | Total | C | O | 0       | 0       |
|     |       |          | 3     | 1 | 2 |         |         |
| 7   | H     | 1        | Total | C | O | 0       | 0       |
|     |       |          | 3     | 1 | 2 |         |         |
| 7   | H     | 1        | Total | C | O | 0       | 0       |
|     |       |          | 3     | 1 | 2 |         |         |
| 7   | H     | 1        | Total | C | O | 0       | 0       |
|     |       |          | 3     | 1 | 2 |         |         |
| 7   | H     | 1        | Total | C | O | 0       | 0       |
|     |       |          | 3     | 1 | 2 |         |         |
| 7   | H     | 1        | Total | C | O | 0       | 0       |
|     |       |          | 3     | 1 | 2 |         |         |
| 7   | H     | 1        | Total | C | O | 0       | 0       |
|     |       |          | 3     | 1 | 2 |         |         |
| 7   | H     | 1        | Total | C | O | 0       | 0       |
|     |       |          | 3     | 1 | 2 |         |         |
| 7   | H     | 1        | Total | C | O | 0       | 0       |
|     |       |          | 3     | 1 | 2 |         |         |
| 7   | H     | 1        | Total | C | O | 0       | 0       |
|     |       |          | 3     | 1 | 2 |         |         |
| 7   | H     | 1        | Total | C | O | 0       | 0       |
|     |       |          | 3     | 1 | 2 |         |         |
| 7   | H     | 1        | Total | C | O | 0       | 0       |
|     |       |          | 3     | 1 | 2 |         |         |
| 7   | H     | 1        | Total | C | O | 0       | 0       |
|     |       |          | 3     | 1 | 2 |         |         |
| 7   | H     | 1        | Total | C | O | 0       | 0       |
|     |       |          | 3     | 1 | 2 |         |         |
| 7   | H     | 1        | Total | C | O | 0       | 0       |
|     |       |          | 3     | 1 | 2 |         |         |
| 7   | H     | 1        | Total | C | O | 0       | 0       |
|     |       |          | 3     | 1 | 2 |         |         |
| 7   | H     | 1        | Total | C | O | 0       | 0       |
|     |       |          | 3     | 1 | 2 |         |         |

Continued on next page...

Continued from previous page...

| Mol | Chain | Residues | Atoms |   |   | ZeroOcc | AltConf |
|-----|-------|----------|-------|---|---|---------|---------|
| 7   | H     | 1        | Total | C | O | 0       | 0       |
|     |       |          | 3     | 1 | 2 |         |         |
| 7   | H     | 1        | Total | C | O | 0       | 0       |
|     |       |          | 3     | 1 | 2 |         |         |
| 7   | H     | 1        | Total | C | O | 0       | 0       |
|     |       |          | 3     | 1 | 2 |         |         |
| 7   | H     | 1        | Total | C | O | 0       | 0       |
|     |       |          | 3     | 1 | 2 |         |         |
| 7   | H     | 1        | Total | C | O | 0       | 0       |
|     |       |          | 3     | 1 | 2 |         |         |
| 7   | H     | 1        | Total | C | O | 0       | 0       |
|     |       |          | 3     | 1 | 2 |         |         |
| 7   | H     | 1        | Total | C | O | 0       | 0       |
|     |       |          | 3     | 1 | 2 |         |         |
| 7   | H     | 1        | Total | C | O | 0       | 0       |
|     |       |          | 3     | 1 | 2 |         |         |
| 7   | H     | 1        | Total | C | O | 0       | 0       |
|     |       |          | 3     | 1 | 2 |         |         |
| 7   | H     | 1        | Total | C | O | 0       | 0       |
|     |       |          | 3     | 1 | 2 |         |         |
| 7   | H     | 1        | Total | C | O | 0       | 0       |
|     |       |          | 3     | 1 | 2 |         |         |
| 7   | H     | 1        | Total | C | O | 0       | 0       |
|     |       |          | 3     | 1 | 2 |         |         |
| 7   | H     | 1        | Total | C | O | 0       | 0       |
|     |       |          | 3     | 1 | 2 |         |         |
| 7   | H     | 1        | Total | C | O | 0       | 0       |
|     |       |          | 3     | 1 | 2 |         |         |
| 7   | H     | 1        | Total | C | O | 0       | 0       |
|     |       |          | 3     | 1 | 2 |         |         |
| 7   | H     | 1        | Total | C | O | 0       | 0       |
|     |       |          | 3     | 1 | 2 |         |         |
| 7   | H     | 1        | Total | C | O | 0       | 0       |
|     |       |          | 3     | 1 | 2 |         |         |
| 7   | H     | 1        | Total | C | O | 0       | 0       |
|     |       |          | 3     | 1 | 2 |         |         |

Continued on next page...

Continued from previous page...

| Mol | Chain | Residues | Atoms |   |   | ZeroOcc | AltConf |
|-----|-------|----------|-------|---|---|---------|---------|
| 7   | H     | 1        | Total | C | O | 0       | 0       |
|     |       |          | 3     | 1 | 2 |         |         |
| 7   | H     | 1        | Total | C | O | 0       | 0       |
|     |       |          | 3     | 1 | 2 |         |         |
| 7   | H     | 1        | Total | C | O | 0       | 0       |
|     |       |          | 3     | 1 | 2 |         |         |
| 7   | H     | 1        | Total | C | O | 0       | 0       |
|     |       |          | 3     | 1 | 2 |         |         |
| 7   | H     | 1        | Total | C | O | 0       | 0       |
|     |       |          | 3     | 1 | 2 |         |         |
| 7   | H     | 1        | Total | C | O | 0       | 0       |
|     |       |          | 3     | 1 | 2 |         |         |
| 7   | H     | 1        | Total | C | O | 0       | 0       |
|     |       |          | 3     | 1 | 2 |         |         |
| 7   | H     | 1        | Total | C | O | 0       | 0       |
|     |       |          | 3     | 1 | 2 |         |         |
| 7   | H     | 1        | Total | C | O | 0       | 0       |
|     |       |          | 3     | 1 | 2 |         |         |
| 7   | H     | 1        | Total | C | O | 0       | 0       |
|     |       |          | 3     | 1 | 2 |         |         |
| 7   | H     | 1        | Total | C | O | 0       | 0       |
|     |       |          | 3     | 1 | 2 |         |         |
| 7   | H     | 1        | Total | C | O | 0       | 0       |
|     |       |          | 3     | 1 | 2 |         |         |
| 7   | H     | 1        | Total | C | O | 0       | 0       |
|     |       |          | 3     | 1 | 2 |         |         |
| 7   | H     | 1        | Total | C | O | 0       | 0       |
|     |       |          | 3     | 1 | 2 |         |         |
| 7   | H     | 1        | Total | C | O | 0       | 0       |
|     |       |          | 3     | 1 | 2 |         |         |
| 7   | H     | 1        | Total | C | O | 0       | 0       |
|     |       |          | 3     | 1 | 2 |         |         |
| 7   | H     | 1        | Total | C | O | 0       | 0       |
|     |       |          | 3     | 1 | 2 |         |         |
| 7   | H     | 1        | Total | C | O | 0       | 0       |
|     |       |          | 3     | 1 | 2 |         |         |

Continued on next page...

Continued from previous page...

| Mol | Chain | Residues | Atoms |   |   | ZeroOcc | AltConf |
|-----|-------|----------|-------|---|---|---------|---------|
| 7   | H     | 1        | Total | C | O | 0       | 0       |
|     |       |          | 3     | 1 | 2 |         |         |
| 7   | H     | 1        | Total | C | O | 0       | 0       |
|     |       |          | 3     | 1 | 2 |         |         |
| 7   | H     | 1        | Total | C | O | 0       | 0       |
|     |       |          | 3     | 1 | 2 |         |         |
| 7   | H     | 1        | Total | C | O | 0       | 0       |
|     |       |          | 3     | 1 | 2 |         |         |
| 7   | H     | 1        | Total | C | O | 0       | 0       |
|     |       |          | 3     | 1 | 2 |         |         |
| 7   | H     | 1        | Total | C | O | 0       | 0       |
|     |       |          | 3     | 1 | 2 |         |         |
| 7   | H     | 1        | Total | C | O | 0       | 0       |
|     |       |          | 3     | 1 | 2 |         |         |
| 7   | H     | 1        | Total | C | O | 0       | 0       |
|     |       |          | 3     | 1 | 2 |         |         |
| 7   | H     | 1        | Total | C | O | 0       | 0       |
|     |       |          | 3     | 1 | 2 |         |         |
| 7   | H     | 1        | Total | C | O | 0       | 0       |
|     |       |          | 3     | 1 | 2 |         |         |
| 7   | H     | 1        | Total | C | O | 0       | 0       |
|     |       |          | 3     | 1 | 2 |         |         |
| 7   | H     | 1        | Total | C | O | 0       | 0       |
|     |       |          | 3     | 1 | 2 |         |         |
| 7   | H     | 1        | Total | C | O | 0       | 0       |
|     |       |          | 3     | 1 | 2 |         |         |
| 7   | H     | 1        | Total | C | O | 0       | 0       |
|     |       |          | 3     | 1 | 2 |         |         |
| 7   | H     | 1        | Total | C | O | 0       | 0       |
|     |       |          | 3     | 1 | 2 |         |         |
| 7   | H     | 1        | Total | C | O | 0       | 0       |
|     |       |          | 3     | 1 | 2 |         |         |
| 7   | H     | 1        | Total | C | O | 0       | 0       |
|     |       |          | 3     | 1 | 2 |         |         |

Continued on next page...

Continued from previous page...

| Mol | Chain | Residues | Atoms |   |   | ZeroOcc | AltConf |
|-----|-------|----------|-------|---|---|---------|---------|
| 7   | H     | 1        | Total | C | O | 0       | 0       |
|     |       |          | 3     | 1 | 2 |         |         |
| 7   | H     | 1        | Total | C | O | 0       | 0       |
|     |       |          | 3     | 1 | 2 |         |         |
| 7   | H     | 1        | Total | C | O | 0       | 0       |
|     |       |          | 3     | 1 | 2 |         |         |
| 7   | H     | 1        | Total | C | O | 0       | 0       |
|     |       |          | 3     | 1 | 2 |         |         |
| 7   | H     | 1        | Total | C | O | 0       | 0       |
|     |       |          | 3     | 1 | 2 |         |         |
| 7   | H     | 1        | Total | C | O | 0       | 0       |
|     |       |          | 3     | 1 | 2 |         |         |
| 7   | H     | 1        | Total | C | O | 0       | 0       |
|     |       |          | 3     | 1 | 2 |         |         |
| 7   | H     | 1        | Total | C | O | 0       | 0       |
|     |       |          | 3     | 1 | 2 |         |         |
| 7   | H     | 1        | Total | C | O | 0       | 0       |
|     |       |          | 3     | 1 | 2 |         |         |
| 7   | H     | 1        | Total | C | O | 0       | 0       |
|     |       |          | 3     | 1 | 2 |         |         |
| 7   | H     | 1        | Total | C | O | 0       | 0       |
|     |       |          | 3     | 1 | 2 |         |         |
| 7   | H     | 1        | Total | C | O | 0       | 0       |
|     |       |          | 3     | 1 | 2 |         |         |
| 7   | H     | 1        | Total | C | O | 0       | 0       |
|     |       |          | 3     | 1 | 2 |         |         |
| 7   | H     | 1        | Total | C | O | 0       | 0       |
|     |       |          | 3     | 1 | 2 |         |         |
| 7   | H     | 1        | Total | C | O | 0       | 0       |
|     |       |          | 3     | 1 | 2 |         |         |
| 7   | H     | 1        | Total | C | O | 0       | 0       |
|     |       |          | 3     | 1 | 2 |         |         |
| 7   | H     | 1        | Total | C | O | 0       | 0       |
|     |       |          | 3     | 1 | 2 |         |         |

- Molecule 8 is SODIUM ION (three-letter code: NA) (formula: Na).

| Mol | Chain | Residues | Atoms |    | ZeroOcc | AltConf |
|-----|-------|----------|-------|----|---------|---------|
| 8   | I     | 1        | Total | Na | 0       | 0       |
|     |       |          | 1     | 1  |         |         |
| 8   | I     | 1        | Total | Na | 0       | 0       |
|     |       |          | 1     | 1  |         |         |
| 8   | I     | 1        | Total | Na | 0       | 0       |
|     |       |          | 1     | 1  |         |         |
| 8   | I     | 1        | Total | Na | 0       | 0       |
|     |       |          | 1     | 1  |         |         |
| 8   | I     | 1        | Total | Na | 0       | 0       |
|     |       |          | 1     | 1  |         |         |
| 8   | I     | 1        | Total | Na | 0       | 0       |
|     |       |          | 1     | 1  |         |         |

- Molecule 9 is GLYCEROL (three-letter code: GOL) (formula: C<sub>3</sub>H<sub>8</sub>O<sub>3</sub>).

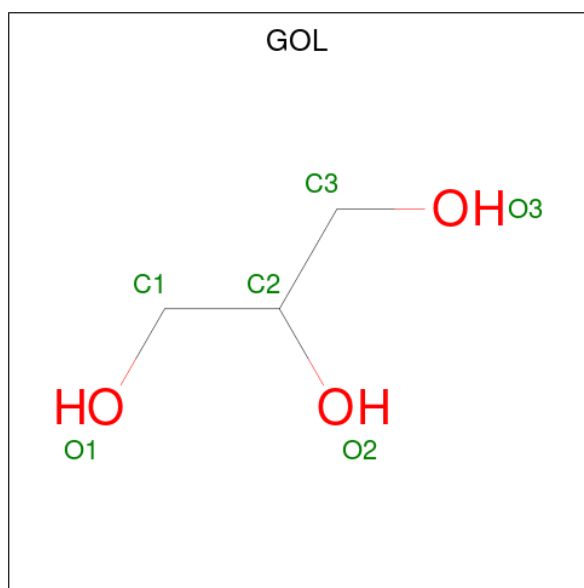

| Mol | Chain | Residues | Atoms |   |   | ZeroOcc | AltConf |
|-----|-------|----------|-------|---|---|---------|---------|
| 9   | K     | 1        | Total | C | O | 0       | 1       |
|     |       |          | 12    | 6 | 6 |         |         |
| 9   | K     | 1        | Total | C | O | 0       | 0       |
|     |       |          | 6     | 3 | 3 |         |         |
| 9   | K     | 1        | Total | C | O | 0       | 1       |
|     |       |          | 12    | 6 | 6 |         |         |

Continued on next page...

Continued from previous page...

| Mol | Chain | Residues | Atoms |   |   | ZeroOcc | AltConf |
|-----|-------|----------|-------|---|---|---------|---------|
| 9   | K     | 1        | Total | C | O | 0       | 0       |
|     |       |          | 6     | 3 | 3 |         |         |
| 9   | K     | 1        | Total | C | O | 0       | 1       |
|     |       |          | 12    | 6 | 6 |         |         |
| 9   | K     | 1        | Total | C | O | 0       | 1       |
|     |       |          | 12    | 6 | 6 |         |         |
| 9   | K     | 1        | Total | C | O | 0       | 0       |
|     |       |          | 6     | 3 | 3 |         |         |
| 9   | K     | 1        | Total | C | O | 0       | 0       |
|     |       |          | 6     | 3 | 3 |         |         |
| 9   | K     | 1        | Total | C | O | 0       | 0       |
|     |       |          | 6     | 3 | 3 |         |         |

- Molecule 10 is water.

| Mol | Chain | Residues | Atoms |      | ZeroOcc | AltConf |
|-----|-------|----------|-------|------|---------|---------|
| 10  | G     | 1339     | Total | O    | 0       | 0       |
|     |       |          | 1339  | 1339 |         |         |

### 3 Residue-property plots

These plots are drawn for all protein, RNA, DNA and oligosaccharide chains in the entry. The first graphic for a chain summarises the proportions of the various outlier classes displayed in the second graphic. The second graphic shows the sequence view annotated by issues in geometry and electron density. Residues are color-coded according to the number of geometric quality criteria for which they contain at least one outlier: green = 0, yellow = 1, orange = 2 and red = 3 or more. A red dot above a residue indicates a poor fit to the electron density ( $RSRZ > 2$ ). Stretches of 2 or more consecutive residues without any outlier are shown as a green connector. Residues present in the sample, but not in the model, are shown in grey.

#### • Molecule 1: Cytochrome P-450

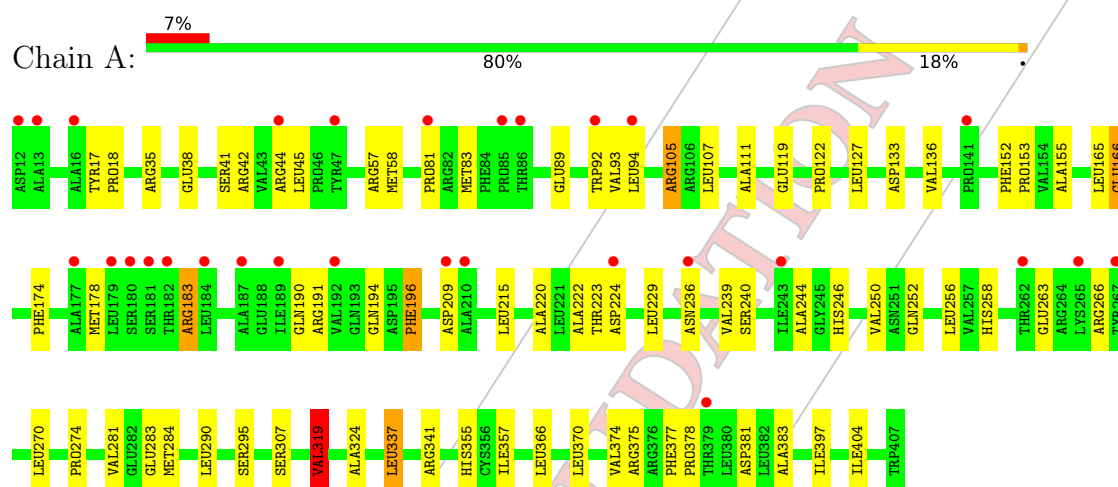

#### • Molecule 1: Cytochrome P-450

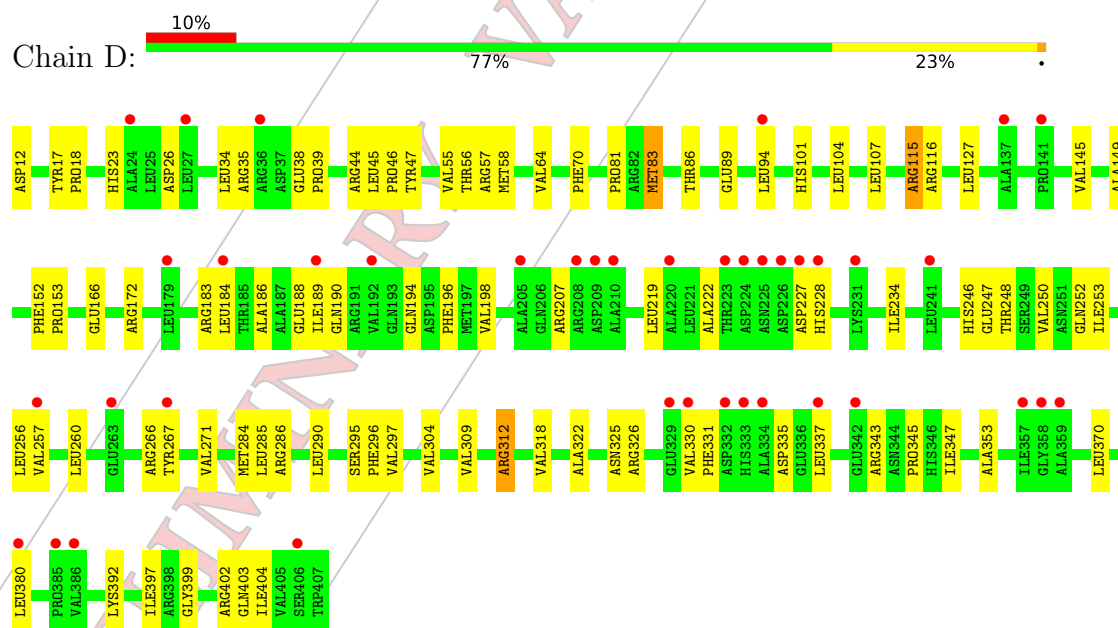

#### • Molecule 1: Cytochrome P-450

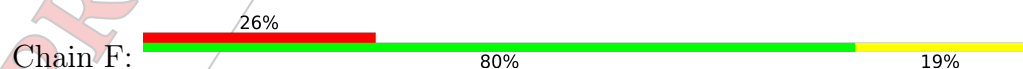



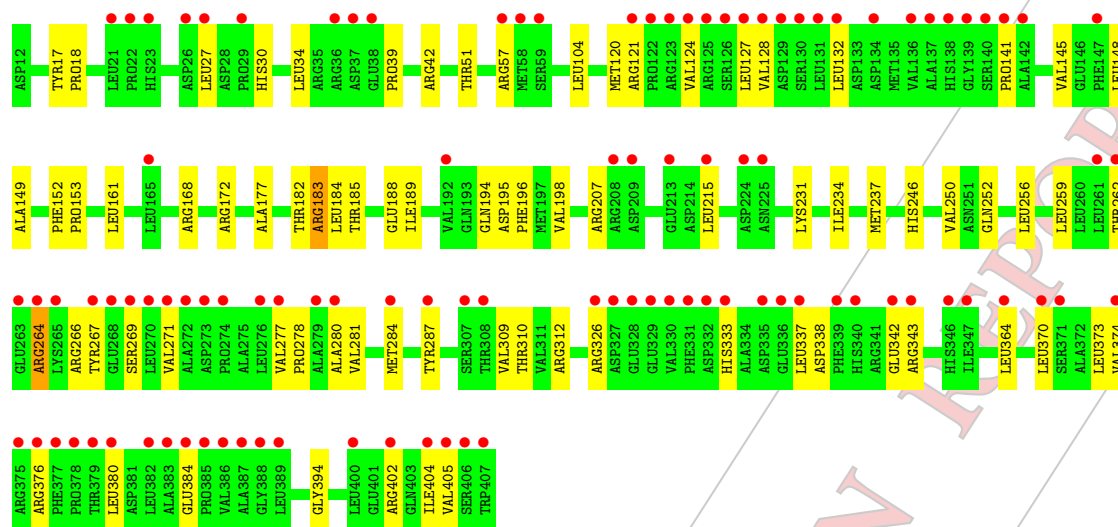

• Molecule 2: Cytochrome P-450

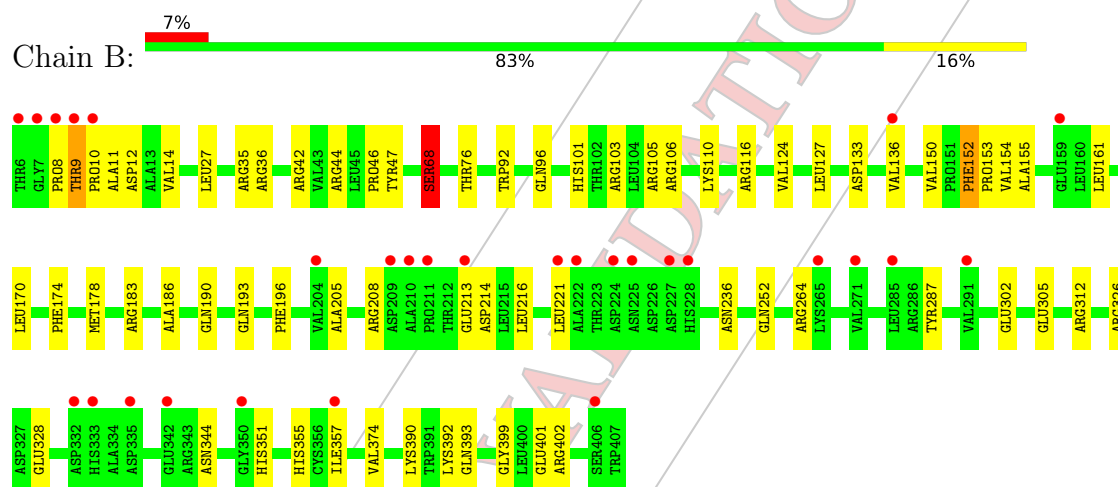

• Molecule 3: Cytochrome P-450

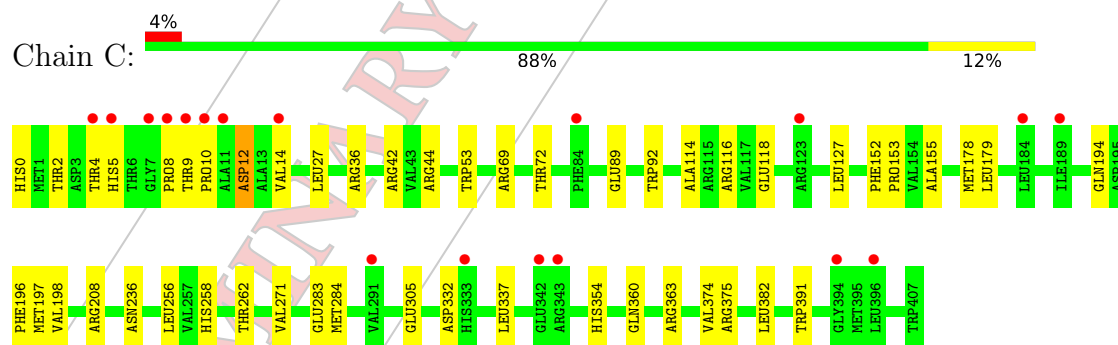

• Molecule 4: Cytochrome P-450

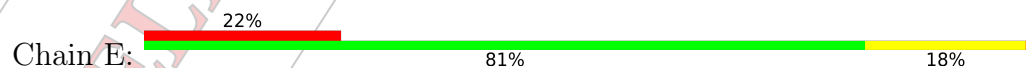

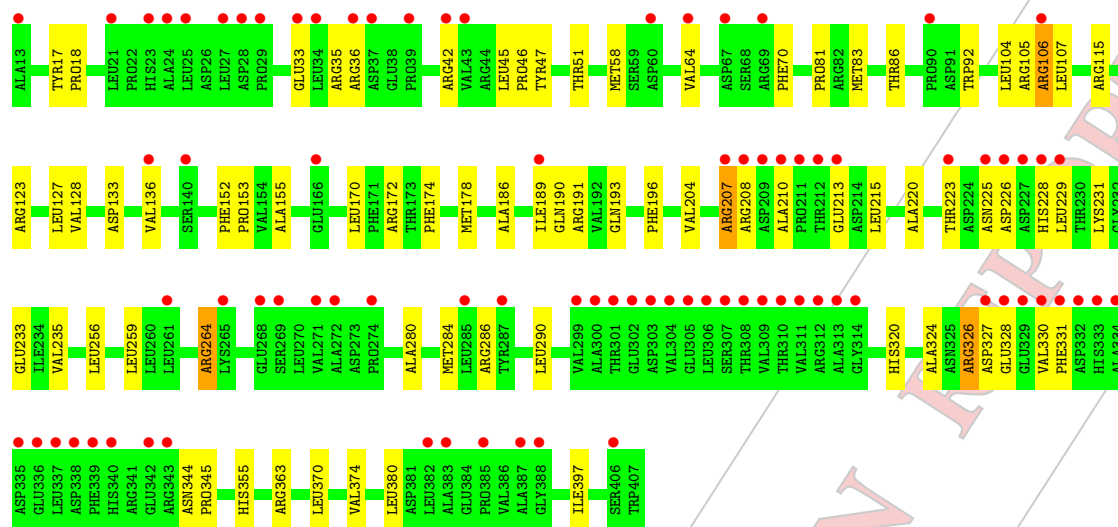

## 4 Data and refinement statistics

| Property                                                                | Value                                                       | Source           |
|-------------------------------------------------------------------------|-------------------------------------------------------------|------------------|
| Space group                                                             | C 1 2 1                                                     | Depositor        |
| Cell constants<br>a, b, c, $\alpha$ , $\beta$ , $\gamma$                | 247.76Å 110.49Å 159.82Å<br>90.00° 129.66° 90.00°            | Depositor        |
| Resolution (Å)                                                          | 48.03 – 2.08<br>47.98 – 1.96                                | Depositor<br>EDS |
| % Data completeness<br>(in resolution range)                            | 99.8 (48.03-2.08)<br>99.7 (47.98-1.96)                      | Depositor<br>EDS |
| $R_{merge}$                                                             | 0.08                                                        | Depositor        |
| $R_{sym}$                                                               | (Not available)                                             | Depositor        |
| $\langle I/\sigma(I) \rangle$ <sup>1</sup>                              | 1.36 (at 1.97Å)                                             | Xtriage          |
| Refinement program                                                      | REFMAC 5.8.0267                                             | Depositor        |
| R, $R_{free}$                                                           | 0.170 , 0.228<br>0.181 , 0.228                              | Depositor<br>DCC |
| $R_{free}$ test set                                                     | 11825 reflections (5.00%)                                   | wwPDB-VP         |
| Wilson B-factor (Å <sup>2</sup> )                                       | 50.9                                                        | Xtriage          |
| Anisotropy                                                              | 0.025                                                       | Xtriage          |
| Bulk solvent $k_{sol}$ (e/Å <sup>3</sup> ), $B_{sol}$ (Å <sup>2</sup> ) | (Not available) , (Not available)                           | EDS              |
| L-test for twinning <sup>2</sup>                                        | $\langle  L  \rangle = 0.50$ , $\langle L^2 \rangle = 0.33$ | Xtriage          |
| Estimated twinning fraction                                             | 0.010 for -h-2*k,l                                          | Xtriage          |
| $F_o, F_c$ correlation                                                  | 0.97                                                        | EDS              |
| Total number of atoms                                                   | 21704                                                       | wwPDB-VP         |
| Average B, all atoms (Å <sup>2</sup> )                                  | 59.0                                                        | wwPDB-VP         |

Xtriage's analysis on translational NCS is as follows: *The analyses of the Patterson function reveals a significant off-origin peak that is 37.94 % of the origin peak, indicating pseudo-translational symmetry. The chance of finding a peak of this or larger height randomly in a structure without pseudo-translational symmetry is equal to 3.9742e-04. The detected translational NCS is most likely also responsible for the elevated intensity ratio.*

<sup>1</sup> Intensities estimated from amplitudes.

<sup>2</sup> Theoretical values of  $\langle |L| \rangle$ ,  $\langle L^2 \rangle$  for acentric reflections are 0.5, 0.333 respectively for untwinned datasets, and 0.375, 0.2 for perfectly twinned datasets.

## 5 Model quality (i)

### 5.1 Standard geometry (i)

Bond lengths and bond angles in the following residue types are not validated in this section: DEB, GOL, FMT, HEM, NA

The Z score for a bond length (or angle) is the number of standard deviations the observed value is removed from the expected value. A bond length (or angle) with  $|Z| > 5$  is considered an outlier worth inspection. RMSZ is the root-mean-square of all Z scores of the bond lengths (or angles).

| Mol | Chain | Bond lengths |         | Bond angles |                 |
|-----|-------|--------------|---------|-------------|-----------------|
|     |       | RMSZ         | # Z  >5 | RMSZ        | # Z  >5         |
| 1   | A     | 0.80         | 0/3456  | 0.98        | 9/4701 (0.2%)   |
| 1   | D     | 0.82         | 0/3303  | 0.99        | 3/4499 (0.1%)   |
| 1   | F     | 0.74         | 0/3213  | 0.90        | 0/4378          |
| 2   | B     | 0.80         | 0/3491  | 0.94        | 2/4750 (0.0%)   |
| 3   | C     | 0.80         | 0/3516  | 0.94        | 1/4785 (0.0%)   |
| 4   | E     | 0.75         | 0/3231  | 0.90        | 2/4400 (0.0%)   |
| All | All   | 0.79         | 0/20210 | 0.94        | 17/27513 (0.1%) |

Chiral center outliers are detected by calculating the chiral volume of a chiral center and verifying if the center is modelled as a planar moiety or with the opposite hand. A planarity outlier is detected by checking planarity of atoms in a peptide group, atoms in a mainchain group or atoms of a sidechain that are expected to be planar.

| Mol | Chain | #Chirality outliers | #Planarity outliers |
|-----|-------|---------------------|---------------------|
| 1   | A     | 0                   | 3                   |
| 2   | B     | 0                   | 1                   |
| All | All   | 0                   | 4                   |

There are no bond length outliers.

All (17) bond angle outliers are listed below:

| Mol | Chain | Res    | Type | Atoms     | Z     | Observed(°) | Ideal(°) |
|-----|-------|--------|------|-----------|-------|-------------|----------|
| 1   | A     | 319[A] | VAL  | CA-C-O    | -8.17 | 102.95      | 120.10   |
| 1   | A     | 319[B] | VAL  | CA-C-O    | -8.17 | 102.95      | 120.10   |
| 2   | B     | 68     | SER  | N-CA-C    | 7.91  | 132.36      | 111.00   |
| 1   | A     | 319[A] | VAL  | CA-C-N    | 6.10  | 130.62      | 117.20   |
| 1   | A     | 319[B] | VAL  | CA-C-N    | 6.10  | 130.62      | 117.20   |
| 4   | E     | 207    | ARG  | NE-CZ-NH1 | -5.94 | 117.33      | 120.30   |
| 1   | A     | 105[A] | ARG  | NE-CZ-NH2 | -5.77 | 117.41      | 120.30   |
| 1   | A     | 105[B] | ARG  | NE-CZ-NH2 | -5.77 | 117.41      | 120.30   |

*Continued on next page...*

Continued from previous page...

| Mol | Chain | Res    | Type | Atoms     | Z     | Observed(°) | Ideal(°) |
|-----|-------|--------|------|-----------|-------|-------------|----------|
| 1   | A     | 105[A] | ARG  | NE-CZ-NH1 | 5.58  | 123.09      | 120.30   |
| 1   | A     | 105[B] | ARG  | NE-CZ-NH1 | 5.58  | 123.09      | 120.30   |
| 1   | D     | 83[A]  | MET  | CA-C-O    | 5.34  | 131.31      | 120.10   |
| 1   | D     | 83[B]  | MET  | CA-C-O    | 5.34  | 131.31      | 120.10   |
| 1   | D     | 172    | ARG  | NE-CZ-NH2 | -5.33 | 117.64      | 120.30   |
| 2   | B     | 152    | PHE  | CB-CA-C   | 5.28  | 120.96      | 110.40   |
| 3   | C     | 363    | ARG  | NE-CZ-NH1 | 5.23  | 122.91      | 120.30   |
| 1   | A     | 209    | ASP  | CB-CA-C   | 5.12  | 120.64      | 110.40   |
| 4   | E     | 363    | ARG  | NE-CZ-NH2 | -5.08 | 117.76      | 120.30   |

There are no chirality outliers.

All (4) planarity outliers are listed below:

| Mol | Chain | Res    | Type | Group     |
|-----|-------|--------|------|-----------|
| 1   | A     | 319[A] | VAL  | Mainchain |
| 1   | A     | 319[B] | VAL  | Mainchain |
| 1   | A     | 42     | ARG  | Sidechain |
| 2   | B     | 68     | SER  | Mainchain |

## 5.2 Too-close contacts [i](#)

In the following table, the Non-H and H(model) columns list the number of non-hydrogen atoms and hydrogen atoms in the chain respectively. The H(added) column lists the number of hydrogen atoms added and optimized by MolProbity. The Clashes column lists the number of clashes within the asymmetric unit, whereas Symm-Clashes lists symmetry-related clashes.

| Mol | Chain | Non-H | H(model) | H(added) | Clashes | Symm-Clashes |
|-----|-------|-------|----------|----------|---------|--------------|
| 1   | A     | 3298  | 0        | 3371     | 98      | 0            |
| 1   | D     | 3186  | 0        | 3212     | 88      | 0            |
| 1   | F     | 3132  | 0        | 3113     | 68      | 0            |
| 2   | B     | 3331  | 0        | 3408     | 94      | 1            |
| 3   | C     | 3354  | 0        | 3421     | 59      | 1            |
| 4   | E     | 3141  | 0        | 3143     | 70      | 0            |
| 5   | A     | 43    | 0        | 30       | 3       | 0            |
| 5   | B     | 43    | 0        | 30       | 1       | 0            |
| 5   | C     | 43    | 0        | 30       | 0       | 0            |
| 5   | D     | 43    | 0        | 30       | 4       | 0            |
| 5   | E     | 43    | 0        | 30       | 2       | 0            |
| 5   | F     | 43    | 0        | 30       | 3       | 0            |
| 6   | A     | 27    | 0        | 38       | 8       | 0            |
| 6   | B     | 27    | 0        | 38       | 2       | 0            |

Continued on next page...

Continued from previous page...

| Mol | Chain | Non-H | H(model) | H(added) | Clashes | Symm-Clashes |
|-----|-------|-------|----------|----------|---------|--------------|
| 6   | D     | 27    | 0        | 38       | 0       | 0            |
| 6   | E     | 27    | 0        | 38       | 0       | 0            |
| 6   | F     | 27    | 0        | 38       | 0       | 0            |
| 6   | Z     | 27    | 0        | 38       | 6       | 0            |
| 7   | H     | 417   | 0        | 139      | 47      | 1            |
| 8   | I     | 8     | 0        | 0        | 0       | 0            |
| 9   | K     | 78    | 0        | 101      | 31      | 0            |
| 10  | G     | 1339  | 0        | 0        | 23      | 1            |
| All | All   | 21704 | 0        | 20316    | 481     | 2            |

The all-atom clashscore is defined as the number of clashes found per 1000 atoms (including hydrogen atoms). The all-atom clashscore for this structure is 12.

All (481) close contacts within the same asymmetric unit are listed below, sorted by their clash magnitude.

| Atom-1              | Atom-2              | Interatomic distance (Å) | Clash overlap (Å) |
|---------------------|---------------------|--------------------------|-------------------|
| 2:B:236[A]:ASN:OD1  | 9:K:7[A]:GOL:H2     | 1.22                     | 1.24              |
| 2:B:236[A]:ASN:OD1  | 9:K:7[A]:GOL:C2     | 2.04                     | 1.05              |
| 1:D:115[A]:ARG:HH11 | 1:D:115[A]:ARG:CG   | 1.70                     | 1.04              |
| 1:A:92[B]:TRP:HH2   | 6:A:502:DEB:H223    | 1.25                     | 1.02              |
| 2:B:92:TRP:HA       | 2:B:236[A]:ASN:ND2  | 1.74                     | 1.01              |
| 3:C:89[B]:GLU:OE2   | 3:C:92[B]:TRP:CG    | 2.16                     | 0.98              |
| 2:B:161:LEU:O       | 2:B:216[B]:LEU:HD13 | 1.65                     | 0.96              |
| 2:B:92:TRP:HA       | 2:B:236[A]:ASN:HD22 | 1.27                     | 0.96              |
| 2:B:236[A]:ASN:CG   | 9:K:7[A]:GOL:H2     | 1.86                     | 0.95              |
| 1:A:92[B]:TRP:HZ3   | 1:A:240:SER:HG      | 0.98                     | 0.92              |
| 4:E:106[A]:ARG:HH21 | 4:E:106[A]:ARG:HG3  | 1.34                     | 0.91              |
| 1:F:266:ARG:NE      | 1:F:337:LEU:HD12    | 1.85                     | 0.91              |
| 1:A:122:PRO:HB3     | 1:D:309:VAL:HG22    | 1.53                     | 0.90              |
| 4:E:45:LEU:HD12     | 4:E:81:PRO:HB2      | 1.52                     | 0.90              |
| 1:A:92[B]:TRP:CH2   | 6:A:502:DEB:H223    | 2.07                     | 0.89              |
| 4:E:226:ASP:OD2     | 4:E:229:LEU:HB2     | 1.71                     | 0.89              |
| 2:B:9[A]:THR:HG23   | 2:B:10[A]:PRO:CD    | 2.02                     | 0.89              |
| 1:A:35[B]:ARG:HE    | 9:K:13:GOL:H32      | 1.36                     | 0.88              |
| 1:D:267:TYR:CE1     | 1:D:380:LEU:HD23    | 2.09                     | 0.88              |
| 3:C:89[B]:GLU:OE2   | 3:C:92[B]:TRP:CD2   | 2.27                     | 0.87              |
| 1:A:92[B]:TRP:CZ2   | 1:A:94:LEU:HD12     | 2.10                     | 0.87              |
| 2:B:161:LEU:HB3     | 2:B:216[B]:LEU:CD1  | 2.05                     | 0.86              |
| 1:D:17:TYR:HD2      | 1:D:83[B]:MET:HE1   | 1.40                     | 0.85              |
| 1:A:370:LEU:O       | 1:A:374:VAL:HG23    | 1.75                     | 0.85              |
| 2:B:9[A]:THR:HG23   | 2:B:10[A]:PRO:HD2   | 1.57                     | 0.84              |

Continued on next page...

Continued from previous page...

| Atom-1              | Atom-2              | Interatomic distance (Å) | Clash overlap (Å) |
|---------------------|---------------------|--------------------------|-------------------|
| 1:A:92[B]:TRP:HZ3   | 1:A:240:SER:OG      | 1.60                     | 0.84              |
| 4:E:106[A]:ARG:HH21 | 4:E:106[A]:ARG:CG   | 1.90                     | 0.84              |
| 1:D:115[A]:ARG:HH11 | 1:D:115[A]:ARG:HG2  | 1.42                     | 0.83              |
| 1:F:185:THR:OG1     | 1:F:188:GLU:HG3     | 1.77                     | 0.83              |
| 1:D:115[A]:ARG:HH11 | 1:D:115[A]:ARG:HG3  | 1.42                     | 0.82              |
| 3:C:92[B]:TRP:HH2   | 3:C:178:MET:HE1     | 1.44                     | 0.82              |
| 2:B:161:LEU:HB3     | 2:B:216[B]:LEU:HD11 | 1.61                     | 0.82              |
| 1:F:266:ARG:CZ      | 1:F:337:LEU:HD12    | 2.09                     | 0.81              |
| 4:E:280:ALA:O       | 4:E:284[A]:MET:HG3  | 1.81                     | 0.81              |
| 1:F:277:VAL:HG23    | 1:F:278:PRO:HD3     | 1.63                     | 0.81              |
| 1:D:257:VAL:HG23    | 1:D:403:GLN:HE22    | 1.46                     | 0.81              |
| 1:F:161:LEU:HD23    | 1:F:215:LEU:HD12    | 1.63                     | 0.80              |
| 1:A:45:LEU:HD12     | 1:A:81:PRO:HB2      | 1.62                     | 0.80              |
| 1:A:92[B]:TRP:HZ2   | 6:A:502:DEB:HO9     | 1.30                     | 0.79              |
| 1:F:128:VAL:O       | 1:F:132:LEU:HG      | 1.82                     | 0.79              |
| 1:F:195:ASP:O       | 1:F:198:VAL:HG22    | 1.81                     | 0.79              |
| 3:C:179[B]:LEU:HD11 | 6:Z:502:DEB:H201    | 1.64                     | 0.79              |
| 2:B:10[B]:PRO:HD3   | 3:C:360[B]:GLN:OE1  | 1.83                     | 0.78              |
| 4:E:229:LEU:HA      | 4:E:233[B]:GLU:OE1  | 1.84                     | 0.77              |
| 6:A:502:DEB:H5      | 9:K:8[A]:GOL:H2     | 1.66                     | 0.77              |
| 1:D:115[A]:ARG:HG3  | 1:D:115[A]:ARG:NH1  | 1.98                     | 0.77              |
| 1:A:45:LEU:HD12     | 1:A:81:PRO:CB       | 2.14                     | 0.76              |
| 4:E:45:LEU:HD12     | 4:E:81:PRO:CB       | 2.15                     | 0.76              |
| 4:E:51:THR:HG22     | 7:H:976:FMT:O2      | 1.85                     | 0.76              |
| 3:C:92[B]:TRP:CH2   | 10:G:1347:HOH:O     | 2.37                     | 0.75              |
| 4:E:133:ASP:O       | 4:E:136:VAL:HG22    | 1.86                     | 0.75              |
| 1:F:333:HIS:HE1     | 1:F:338:ASP:OD2     | 1.69                     | 0.75              |
| 2:B:105[A]:ARG:HD3  | 2:B:357:ILE:HD12    | 1.69                     | 0.75              |
| 1:F:256:LEU:HD23    | 1:F:284[B]:MET:HE1  | 1.69                     | 0.75              |
| 4:E:256:LEU:HD22    | 4:E:284[B]:MET:HB3  | 1.67                     | 0.74              |
| 9:K:1[A]:GOL:O3     | 9:K:1[A]:GOL:O1     | 2.02                     | 0.74              |
| 4:E:370:LEU:O       | 4:E:374:VAL:HG23    | 1.87                     | 0.74              |
| 1:D:166[B]:GLU:HG3  | 4:E:228:HIS:NE2     | 2.04                     | 0.73              |
| 1:F:51:THR:O        | 7:H:938:FMT:O1      | 2.07                     | 0.73              |
| 4:E:106[A]:ARG:HG3  | 4:E:106[A]:ARG:NH2  | 1.96                     | 0.72              |
| 1:D:297:VAL:HG22    | 1:D:318:VAL:HG22    | 1.72                     | 0.72              |
| 2:B:10[B]:PRO:CD    | 3:C:360[B]:GLN:OE1  | 2.37                     | 0.72              |
| 3:C:92[B]:TRP:CZ2   | 10:G:1347:HOH:O     | 2.42                     | 0.72              |
| 1:A:92[B]:TRP:HZ2   | 1:A:94:LEU:HD12     | 1.52                     | 0.71              |
| 2:B:178[B]:MET:SD   | 2:B:193:GLN:HG2     | 2.30                     | 0.71              |
| 4:E:178[A]:MET:CE   | 9:K:4[A]:GOL:H32    | 2.21                     | 0.71              |

Continued on next page...



Continued from previous page...

| Atom-1              | Atom-2              | Interatomic distance (Å) | Clash overlap (Å) |
|---------------------|---------------------|--------------------------|-------------------|
| 2:B:161:LEU:C       | 2:B:216[B]:LEU:HD13 | 2.10                     | 0.70              |
| 1:A:119:GLU:OE2     | 7:H:966:FMT:O2      | 2.09                     | 0.70              |
| 2:B:351:HIS:HD1     | 7:H:33:FMT:H        | 1.56                     | 0.70              |
| 4:E:207:ARG:HA      | 4:E:210:ALA:HB3     | 1.74                     | 0.70              |
| 1:A:92[B]:TRP:CE3   | 9:K:8[B]:GOL:H2     | 2.27                     | 0.70              |
| 3:C:256:LEU:HD22    | 3:C:284:MET:HB3     | 1.74                     | 0.70              |
| 4:E:178[A]:MET:HE1  | 9:K:4[A]:GOL:H32    | 1.71                     | 0.70              |
| 3:C:92[B]:TRP:HH2   | 3:C:178:MET:CE      | 2.04                     | 0.70              |
| 6:B:502:DEB:O19     | 9:K:7[B]:GOL:H31    | 1.93                     | 0.69              |
| 1:D:86[A]:THR:HG21  | 1:D:189:ILE:CG2     | 2.23                     | 0.69              |
| 1:D:115[A]:ARG:CG   | 1:D:115[A]:ARG:NH1  | 2.41                     | 0.69              |
| 1:A:58[B]:MET:SD    | 1:A:324:ALA:HB1     | 2.33                     | 0.69              |
| 1:A:92[B]:TRP:CH2   | 6:A:502:DEB:H5      | 2.28                     | 0.69              |
| 3:C:89[B]:GLU:CD    | 3:C:92[B]:TRP:CE3   | 2.67                     | 0.69              |
| 2:B:9[A]:THR:HG23   | 2:B:10[A]:PRO:HD3   | 1.73                     | 0.68              |
| 1:D:326:ARG:HD3     | 10:G:254:HOH:O      | 1.93                     | 0.68              |
| 2:B:105[A]:ARG:NH2  | 2:B:355:HIS:O       | 2.26                     | 0.68              |
| 5:D:501:HEM:HBB2    | 5:D:501:HEM:HMB2    | 1.76                     | 0.68              |
| 1:A:127[A]:LEU:HD21 | 1:A:155:ALA:HB3     | 1.76                     | 0.67              |
| 2:B:236[A]:ASN:OD1  | 9:K:7[A]:GOL:C1     | 2.42                     | 0.67              |
| 1:D:45:LEU:HD12     | 1:D:81:PRO:HB2      | 1.76                     | 0.67              |
| 1:F:271:VAL:HG22    | 1:F:374:VAL:HG13    | 1.77                     | 0.67              |
| 1:A:105[A]:ARG:NH2  | 1:A:355:HIS:O       | 2.27                     | 0.67              |
| 1:A:92[B]:TRP:HH2   | 6:A:502:DEB:C22     | 2.05                     | 0.66              |
| 1:A:92[B]:TRP:HE3   | 1:A:92[B]:TRP:HA    | 1.59                     | 0.66              |
| 5:E:501:HEM:HHC     | 5:E:501:HEM:HBB2    | 1.75                     | 0.66              |
| 1:F:39:PRO:HB3      | 1:F:57:ARG:HD2      | 1.78                     | 0.65              |
| 2:B:208:ARG:NH2     | 10:G:559:HOH:O      | 2.30                     | 0.65              |
| 1:D:17:TYR:CD2      | 1:D:83[B]:MET:HE1   | 2.28                     | 0.65              |
| 1:A:122:PRO:CB      | 1:D:309:VAL:HG22    | 2.26                     | 0.65              |
| 1:D:12:ASP:CG       | 1:D:44:ARG:HH21     | 2.00                     | 0.64              |
| 1:F:277:VAL:CG2     | 1:F:278:PRO:HD3     | 2.27                     | 0.64              |
| 1:F:287:TYR:CG      | 1:F:337:LEU:HD21    | 2.31                     | 0.64              |
| 3:C:179[B]:LEU:HD11 | 6:Z:502:DEB:C20     | 2.27                     | 0.64              |
| 5:A:501:HEM:HBB2    | 5:A:501:HEM:HMB2    | 1.79                     | 0.64              |
| 1:A:92[B]:TRP:CE3   | 1:A:92[B]:TRP:HA    | 2.33                     | 0.64              |
| 1:A:283:GLU:HG3     | 1:A:337:LEU:CD2     | 2.27                     | 0.63              |
| 4:E:64:VAL:HG12     | 4:E:70:PHE:CZ       | 2.33                     | 0.63              |
| 1:A:107:LEU:HD11    | 1:A:222:ALA:CB      | 2.29                     | 0.63              |
| 1:A:281:VAL:CG2     | 1:A:370:LEU:HD12    | 2.29                     | 0.63              |
| 1:D:35[B]:ARG:HG3   | 1:D:57[B]:ARG:HG2   | 1.81                     | 0.63              |

Continued on next page...



Continued from previous page...

| Atom-1              | Atom-2              | Interatomic distance (Å) | Clash overlap (Å) |
|---------------------|---------------------|--------------------------|-------------------|
| 1:D:45:LEU:HD11     | 1:D:318:VAL:HG21    | 1.79                     | 0.63              |
| 1:A:92[B]:TRP:CZ3   | 9:K:8[B]:GOL:H2     | 2.35                     | 0.62              |
| 1:A:283:GLU:HG3     | 1:A:337:LEU:HD22    | 1.80                     | 0.62              |
| 4:E:115:ARG:HB3     | 7:H:66:FMT:H        | 1.82                     | 0.62              |
| 1:D:184:LEU:HB2     | 1:D:189:ILE:HD11    | 1.81                     | 0.62              |
| 4:E:327:ASP:HB3     | 4:E:330:VAL:HG12    | 1.80                     | 0.62              |
| 1:D:116:ARG:HB3     | 1:D:116:ARG:NH1     | 2.14                     | 0.61              |
| 1:D:257:VAL:HG23    | 1:D:403:GLN:NE2     | 2.14                     | 0.61              |
| 1:A:174:PHE:O       | 1:A:178[B]:MET:HG2  | 2.01                     | 0.61              |
| 1:F:184:LEU:HB2     | 1:F:189:ILE:HD11    | 1.82                     | 0.61              |
| 2:B:328[A]:GLU:H    | 7:H:19:FMT:C        | 2.14                     | 0.61              |
| 2:B:328[B]:GLU:H    | 7:H:19:FMT:C        | 2.14                     | 0.61              |
| 1:A:256:LEU:HD22    | 1:A:284:MET:HB3     | 1.81                     | 0.61              |
| 4:E:264:ARG:NH2     | 4:E:380:LEU:O       | 2.33                     | 0.61              |
| 2:B:96:GLN:OE1      | 7:H:1009:FMT:H      | 2.00                     | 0.61              |
| 4:E:213:GLU:N       | 4:E:213:GLU:OE1     | 2.34                     | 0.61              |
| 1:A:236[B]:ASN:OD1  | 7:H:1053:FMT:H      | 2.01                     | 0.61              |
| 2:B:236[A]:ASN:ND2  | 9:K:7[A]:GOL:H2     | 2.16                     | 0.60              |
| 1:D:186:ALA:O       | 1:D:190:GLN:HG3     | 2.01                     | 0.60              |
| 3:C:391:TRP:HB2     | 7:H:1040:FMT:H      | 1.81                     | 0.60              |
| 2:B:9[A]:THR:CG2    | 2:B:10[A]:PRO:CD    | 2.78                     | 0.60              |
| 1:A:194[B]:GLN:NE2  | 10:G:701:HOH:O      | 2.35                     | 0.60              |
| 1:A:256:LEU:HD12    | 1:A:370:LEU:HD11    | 1.84                     | 0.60              |
| 4:E:152:PHE:HB3     | 4:E:153:PRO:HD3     | 1.84                     | 0.60              |
| 1:A:355:HIS:NE2     | 7:H:951:FMT:O1      | 2.35                     | 0.60              |
| 2:B:150:VAL:O       | 2:B:154[A]:VAL:HG12 | 2.01                     | 0.60              |
| 1:D:252[A]:GLN:HE21 | 1:D:285:LEU:HD23    | 1.66                     | 0.60              |
| 2:B:76:THR:OG1      | 7:H:20:FMT:O2       | 2.20                     | 0.59              |
| 3:C:89[B]:GLU:CD    | 3:C:92[B]:TRP:CD2   | 2.76                     | 0.59              |
| 1:D:256:LEU:HD12    | 1:D:370[A]:LEU:HD11 | 1.84                     | 0.59              |
| 4:E:104:LEU:HD12    | 4:E:107:LEU:HD12    | 1.83                     | 0.59              |
| 3:C:14:VAL:HG23     | 3:C:44[A]:ARG:CG    | 2.32                     | 0.59              |
| 1:D:45:LEU:HD22     | 1:D:83[B]:MET:CE    | 2.33                     | 0.59              |
| 1:F:280:ALA:O       | 1:F:284[A]:MET:HG3  | 2.02                     | 0.59              |
| 1:F:145:VAL:HA      | 1:F:149:ALA:HB3     | 1.85                     | 0.59              |
| 1:A:92[B]:TRP:CZ3   | 1:A:93:VAL:HG12     | 2.37                     | 0.59              |
| 1:F:182:THR:CG2     | 1:F:394:GLY:HA2     | 2.33                     | 0.59              |
| 3:C:0:HIS:HD2       | 3:C:2:THR:OG1       | 1.86                     | 0.59              |
| 1:F:182:THR:HG22    | 1:F:394:GLY:HA2     | 1.84                     | 0.59              |
| 3:C:89[B]:GLU:OE2   | 3:C:92[B]:TRP:CB    | 2.51                     | 0.58              |
| 1:D:35[B]:ARG:CG    | 1:D:57[B]:ARG:HG2   | 2.33                     | 0.58              |

Continued on next page...

Continued from previous page...

| Atom-1             | Atom-2              | Interatomic distance (Å) | Clash overlap (Å) |
|--------------------|---------------------|--------------------------|-------------------|
| 1:D:86[A]:THR:HG21 | 1:D:189:ILE:HG21    | 1.85                     | 0.58              |
| 1:D:46:PRO:HB2     | 1:D:47:TYR:CD1      | 2.39                     | 0.58              |
| 1:D:183:ARG:HB3    | 1:D:184:LEU:HD12    | 1.84                     | 0.58              |
| 4:E:213:GLU:O      | 4:E:213:GLU:HG2     | 2.03                     | 0.58              |
| 1:D:107:LEU:HD11   | 1:D:234:ILE:HG12    | 1.84                     | 0.58              |
| 1:D:330:VAL:HG23   | 1:D:331:PHE:CD2     | 2.39                     | 0.58              |
| 4:E:256:LEU:HD22   | 4:E:284[A]:MET:HB3  | 1.84                     | 0.58              |
| 2:B:9[B]:THR:O     | 3:C:114:ALA:HB1     | 2.03                     | 0.58              |
| 2:B:9[A]:THR:CG2   | 2:B:10[A]:PRO:HD3   | 2.34                     | 0.57              |
| 1:A:111:ALA:CB     | 1:A:215[A]:LEU:HD21 | 2.35                     | 0.57              |
| 1:A:107:LEU:HD13   | 1:A:229:LEU:CD1     | 2.35                     | 0.57              |
| 1:A:111:ALA:HB2    | 1:A:215[A]:LEU:HD21 | 1.85                     | 0.57              |
| 1:A:281:VAL:HG22   | 1:A:370:LEU:HD12    | 1.85                     | 0.57              |
| 2:B:103:ARG:HH12   | 7:H:1061:FMT:H      | 1.69                     | 0.57              |
| 1:A:57[A]:ARG:NH1  | 1:A:307:SER:CB      | 2.68                     | 0.57              |
| 3:C:14:VAL:HG23    | 3:C:44[A]:ARG:HG2   | 1.85                     | 0.57              |
| 1:F:30:HIS:O       | 1:F:34:LEU:HG       | 2.05                     | 0.57              |
| 1:D:152:PHE:HB3    | 1:D:153:PRO:HD3     | 1.87                     | 0.56              |
| 1:F:195:ASP:O      | 1:F:198:VAL:CG2     | 2.52                     | 0.56              |
| 4:E:178[A]:MET:CE  | 9:K:4[A]:GOL:C3     | 2.84                     | 0.56              |
| 4:E:191:ARG:HG2    | 7:H:71:FMT:H        | 1.86                     | 0.56              |
| 1:F:342:GLU:O      | 1:F:343:ARG:HG3     | 2.06                     | 0.56              |
| 1:D:246:HIS:O      | 1:D:250:VAL:HG23    | 2.06                     | 0.56              |
| 1:D:17:TYR:HD2     | 1:D:83[B]:MET:CE    | 2.17                     | 0.56              |
| 1:A:92[B]:TRP:CZ3  | 1:A:240:SER:OG      | 2.46                     | 0.56              |
| 3:C:89[B]:GLU:OE2  | 3:C:92[B]:TRP:HB2   | 2.05                     | 0.56              |
| 3:C:9:THR:N        | 3:C:10:PRO:CD       | 2.68                     | 0.55              |
| 1:F:287:TYR:CD2    | 1:F:337:LEU:HD23    | 2.40                     | 0.55              |
| 4:E:326:ARG:NH1    | 10:G:268:HOH:O      | 2.38                     | 0.55              |
| 1:F:370:LEU:O      | 1:F:374:VAL:HG23    | 2.06                     | 0.55              |
| 1:D:35[A]:ARG:HD3  | 1:D:56:THR:O        | 2.05                     | 0.55              |
| 5:A:501:HEM:HBB2   | 5:A:501:HEM:CMB     | 2.37                     | 0.55              |
| 1:F:287:TYR:CD2    | 1:F:337:LEU:CD2     | 2.90                     | 0.55              |
| 1:A:57[A]:ARG:NH1  | 1:A:307:SER:OG      | 2.40                     | 0.55              |
| 3:C:14:VAL:CG2     | 3:C:44[A]:ARG:HG2   | 2.36                     | 0.55              |
| 1:F:184:LEU:CB     | 1:F:189:ILE:HD11    | 2.36                     | 0.55              |
| 1:A:105[A]:ARG:CD  | 1:A:357[A]:ILE:HD13 | 2.37                     | 0.54              |
| 3:C:92[B]:TRP:HZ2  | 6:Z:502:DEB:O19     | 1.90                     | 0.54              |
| 1:D:295:SER:OG     | 1:D:296:PHE:O       | 2.20                     | 0.54              |
| 1:A:35[B]:ARG:HE   | 9:K:13:GOL:C3       | 2.15                     | 0.54              |
| 2:B:236[A]:ASN:OD1 | 9:K:7[A]:GOL:H11    | 2.07                     | 0.54              |

Continued on next page...

Continued from previous page...

| Atom-1              | Atom-2              | Interatomic distance (Å) | Clash overlap (Å) |
|---------------------|---------------------|--------------------------|-------------------|
| 4:E:45:LEU:HD22     | 4:E:83:MET:SD       | 2.48                     | 0.54              |
| 3:C:4[A]:THR:HG22   | 3:C:5:HIS:O         | 2.08                     | 0.54              |
| 3:C:92[B]:TRP:CH2   | 3:C:178:MET:CE      | 2.87                     | 0.54              |
| 1:A:105[B]:ARG:HG2  | 1:A:357[B]:ILE:HD11 | 1.88                     | 0.54              |
| 2:B:92:TRP:CD2      | 9:K:7[B]:GOL:H32    | 2.43                     | 0.53              |
| 1:D:166[B]:GLU:HG3  | 4:E:228:HIS:CD2     | 2.44                     | 0.53              |
| 3:C:194:GLN:O       | 3:C:198:VAL:HG23    | 2.09                     | 0.53              |
| 5:F:501:HEM:HMB2    | 5:F:501:HEM:HBB2    | 1.90                     | 0.53              |
| 3:C:179[B]:LEU:CD1  | 6:Z:502:DEB:C20     | 2.87                     | 0.53              |
| 1:D:17:TYR:CD2      | 1:D:83[B]:MET:CE    | 2.92                     | 0.53              |
| 1:A:58[B]:MET:HG2   | 1:A:324:ALA:O       | 2.09                     | 0.53              |
| 1:A:92[B]:TRP:CE3   | 1:A:93:VAL:N        | 2.77                     | 0.53              |
| 2:B:161:LEU:HB3     | 2:B:216[B]:LEU:HD13 | 1.90                     | 0.53              |
| 1:A:92[B]:TRP:CZ2   | 6:A:502:DEB:O19     | 2.48                     | 0.53              |
| 5:E:501:HEM:HBC2    | 5:E:501:HEM:HMC2    | 1.92                     | 0.53              |
| 1:A:57[A]:ARG:HH11  | 1:A:307:SER:CB      | 2.22                     | 0.52              |
| 1:A:166:GLU:H       | 1:A:166:GLU:CD      | 2.11                     | 0.52              |
| 1:D:145:VAL:HA      | 1:D:149:ALA:HB3     | 1.89                     | 0.52              |
| 2:B:101:HIS:CE1     | 2:B:105[B]:ARG:HD2  | 2.44                     | 0.52              |
| 1:F:185:THR:O       | 1:F:189:ILE:HG12    | 2.09                     | 0.52              |
| 3:C:89[B]:GLU:CD    | 3:C:89[B]:GLU:H     | 2.13                     | 0.52              |
| 2:B:127[A]:LEU:HD21 | 2:B:155:ALA:HB3     | 1.90                     | 0.52              |
| 1:D:330:VAL:HG23    | 1:D:331:PHE:CE2     | 2.45                     | 0.52              |
| 1:A:45:LEU:HD12     | 1:A:81:PRO:HB3      | 1.91                     | 0.52              |
| 2:B:105[A]:ARG:CD   | 2:B:357:ILE:HD12    | 2.39                     | 0.52              |
| 1:F:185:THR:HG1     | 1:F:188:GLU:HG3     | 1.74                     | 0.52              |
| 1:A:107:LEU:HD11    | 1:A:222:ALA:HB1     | 1.91                     | 0.52              |
| 2:B:46:PRO:HB2      | 2:B:47:TYR:CD1      | 2.44                     | 0.51              |
| 1:A:92[B]:TRP:CE3   | 1:A:92[B]:TRP:CA    | 2.93                     | 0.51              |
| 1:F:266:ARG:O       | 1:F:269:SER:HB3     | 2.11                     | 0.51              |
| 1:A:92[B]:TRP:CE2   | 1:A:94:LEU:HB2      | 2.45                     | 0.51              |
| 1:D:17:TYR:CD1      | 1:D:18:PRO:HA       | 2.44                     | 0.51              |
| 1:D:246:HIS:NE2     | 1:D:247[B]:GLU:OE2  | 2.43                     | 0.51              |
| 1:F:104:LEU:HB3     | 1:F:237[A]:MET:CE   | 2.40                     | 0.51              |
| 4:E:35:ARG:NH1      | 4:E:326:ARG:O       | 2.44                     | 0.51              |
| 3:C:89[B]:GLU:HB2   | 10:G:205:HOH:O      | 2.10                     | 0.51              |
| 3:C:283:GLU:HG3     | 3:C:337:LEU:HD22    | 1.93                     | 0.51              |
| 2:B:9[B]:THR:HA     | 3:C:360[B]:GLN:OE1  | 2.10                     | 0.51              |
| 1:A:45:LEU:HD22     | 1:A:83:MET:SD       | 2.51                     | 0.51              |
| 2:B:9[A]:THR:CB     | 2:B:10[A]:PRO:CD    | 2.89                     | 0.51              |
| 1:D:194:GLN:O       | 1:D:198:VAL:HG13    | 2.11                     | 0.51              |

Continued on next page...

Continued from previous page...

| Atom-1              | Atom-2              | Interatomic distance (Å) | Clash overlap (Å) |
|---------------------|---------------------|--------------------------|-------------------|
| 1:F:252:GLN:O       | 1:F:256:LEU:HD13    | 2.10                     | 0.51              |
| 2:B:351:HIS:ND1     | 7:H:33:FMT:H        | 2.24                     | 0.51              |
| 1:A:105[A]:ARG:HD3  | 1:A:357[A]:ILE:HD13 | 1.93                     | 0.51              |
| 1:D:104:LEU:O       | 1:D:107:LEU:HB2     | 2.10                     | 0.51              |
| 1:A:274:PRO:HB2     | 1:A:375[A]:ARG:NH2  | 2.26                     | 0.50              |
| 2:B:106[A]:ARG:NH1  | 7:H:1060:FMT:C      | 2.74                     | 0.50              |
| 1:D:256:LEU:HD22    | 1:D:284:MET:HB3     | 1.93                     | 0.50              |
| 2:B:9[B]:THR:HA     | 3:C:360[B]:GLN:CD   | 2.32                     | 0.50              |
| 2:B:10[B]:PRO:N     | 3:C:360[B]:GLN:OE1  | 2.44                     | 0.50              |
| 4:E:178[B]:MET:SD   | 4:E:193:GLN:CG      | 3.00                     | 0.50              |
| 2:B:101:HIS:CE1     | 2:B:105[B]:ARG:CD   | 2.95                     | 0.50              |
| 1:D:253:ILE:O       | 1:D:257:VAL:HG22    | 2.11                     | 0.50              |
| 1:F:267:TYR:OH      | 1:F:373:LEU:O       | 2.29                     | 0.50              |
| 1:D:312:ARG:HD2     | 10:G:968:HOH:O      | 2.11                     | 0.50              |
| 4:E:172:ARG:NH1     | 10:G:809:HOH:O      | 2.38                     | 0.50              |
| 2:B:213:GLU:O       | 2:B:214[A]:ASP:CG   | 2.50                     | 0.50              |
| 2:B:236[A]:ASN:HD21 | 9:K:7[A]:GOL:C2     | 2.25                     | 0.50              |
| 1:F:264:ARG:NH2     | 1:F:380:LEU:O       | 2.41                     | 0.50              |
| 2:B:9[A]:THR:OG1    | 2:B:10[A]:PRO:HD3   | 2.12                     | 0.49              |
| 2:B:393[A]:GLN:NE2  | 10:G:367:HOH:O      | 2.44                     | 0.49              |
| 1:F:234:ILE:O       | 1:F:237[B]:MET:HB2  | 2.12                     | 0.49              |
| 3:C:36:ARG:HD2      | 10:G:1043:HOH:O     | 2.11                     | 0.49              |
| 4:E:331:PHE:CE1     | 4:E:345:PRO:HD2     | 2.47                     | 0.49              |
| 1:F:195:ASP:C       | 1:F:198:VAL:HG22    | 2.31                     | 0.49              |
| 4:E:178[B]:MET:SD   | 4:E:193:GLN:HG2     | 2.53                     | 0.49              |
| 1:A:122:PRO:HB3     | 1:D:309:VAL:CG2     | 2.36                     | 0.49              |
| 2:B:355:HIS:HE2     | 7:H:31:FMT:C        | 2.25                     | 0.49              |
| 1:D:45:LEU:HD22     | 1:D:83[B]:MET:HE1   | 1.94                     | 0.49              |
| 1:D:116:ARG:NH1     | 10:G:627:HOH:O      | 2.44                     | 0.49              |
| 4:E:106[A]:ARG:HH21 | 4:E:106[A]:ARG:CB   | 2.26                     | 0.49              |
| 2:B:14:VAL:HG12     | 3:C:118:GLU:HG2     | 1.94                     | 0.49              |
| 2:B:183:ARG:HH11    | 7:H:1018:FMT:C      | 2.26                     | 0.49              |
| 1:A:105[B]:ARG:NH1  | 1:A:357[B]:ILE:HG13 | 2.28                     | 0.48              |
| 2:B:178[B]:MET:HB3  | 2:B:178[B]:MET:HE2  | 1.65                     | 0.48              |
| 3:C:197[B]:MET:SD   | 3:C:236:ASN:ND2     | 2.86                     | 0.48              |
| 4:E:123:ARG:NH2     | 4:E:127[A]:LEU:HD21 | 2.28                     | 0.48              |
| 1:A:281:VAL:HG22    | 1:A:370:LEU:CD1     | 2.42                     | 0.48              |
| 1:A:17:TYR:HA       | 1:A:18:PRO:C        | 2.33                     | 0.48              |
| 7:H:902:FMT:H       | 10:G:8:HOH:O        | 2.13                     | 0.48              |
| 1:A:38[A]:GLU:HG2   | 1:A:41:SER:HB3      | 1.94                     | 0.48              |
| 1:A:375[B]:ARG:HH21 | 1:A:375[B]:ARG:HG3  | 1.79                     | 0.48              |

Continued on next page...

Continued from previous page...

| Atom-1              | Atom-2              | Interatomic distance (Å) | Clash overlap (Å) |
|---------------------|---------------------|--------------------------|-------------------|
| 2:B:236[A]:ASN:ND2  | 9:K:7[A]:GOL:C2     | 2.76                     | 0.48              |
| 4:E:191:ARG:HG2     | 7:H:71:FMT:C        | 2.44                     | 0.48              |
| 1:A:366:LEU:O       | 1:A:370:LEU:HG      | 2.13                     | 0.48              |
| 2:B:186:ALA:O       | 2:B:190:GLN:HG3     | 2.14                     | 0.48              |
| 1:D:39:PRO:HG3      | 1:D:57[A]:ARG:CZ    | 2.43                     | 0.48              |
| 1:D:248:THR:O       | 1:D:252[B]:GLN:HG2  | 2.13                     | 0.48              |
| 4:E:178[A]:MET:HE2  | 9:K:4[A]:GOL:H32    | 1.95                     | 0.48              |
| 1:F:121:ARG:HG3     | 1:F:364:LEU:HD11    | 1.96                     | 0.48              |
| 1:A:270:LEU:HB3     | 1:A:374:VAL:HG11    | 1.95                     | 0.48              |
| 3:C:92[B]:TRP:CE3   | 3:C:92[B]:TRP:HA    | 2.49                     | 0.48              |
| 1:D:266:ARG:CZ      | 1:D:337[A]:LEU:HD12 | 2.44                     | 0.47              |
| 1:D:267:TYR:O       | 1:D:271:VAL:HG23    | 2.13                     | 0.47              |
| 1:F:127:LEU:HD12    | 1:F:127:LEU:O       | 2.14                     | 0.47              |
| 1:F:287:TYR:CG      | 1:F:337:LEU:CD2     | 2.97                     | 0.47              |
| 3:C:354:HIS:NE2     | 9:K:1[B]:GOL:O3     | 2.33                     | 0.47              |
| 4:E:115:ARG:HB3     | 7:H:66:FMT:C        | 2.43                     | 0.47              |
| 1:A:290:LEU:O       | 1:A:397:ILE:HA      | 2.15                     | 0.47              |
| 2:B:103:ARG:O       | 7:H:1060:FMT:H      | 2.15                     | 0.47              |
| 1:D:38:GLU:OE2      | 7:H:906:FMT:O2      | 2.32                     | 0.47              |
| 1:D:70:PHE:HE2      | 1:D:304:VAL:HG11    | 1.79                     | 0.47              |
| 1:D:252[B]:GLN:HG3  | 5:D:501:HEM:CBB     | 2.44                     | 0.47              |
| 1:D:35[A]:ARG:NH2   | 7:H:960:FMT:O1      | 2.47                     | 0.47              |
| 4:E:17:TYR:HA       | 4:E:18:PRO:C        | 2.34                     | 0.47              |
| 2:B:178[B]:MET:SD   | 2:B:193:GLN:CG      | 3.03                     | 0.47              |
| 2:B:35:ARG:HE       | 7:H:19:FMT:H        | 1.79                     | 0.47              |
| 3:C:92[B]:TRP:CZ2   | 6:Z:502:DEB:O19     | 2.62                     | 0.47              |
| 1:D:183:ARG:C       | 1:D:184:LEU:HD12    | 2.34                     | 0.47              |
| 1:D:86[A]:THR:CG2   | 1:D:189:ILE:HB      | 2.45                     | 0.47              |
| 3:C:152:PHE:HB3     | 3:C:153:PRO:HD3     | 1.96                     | 0.47              |
| 4:E:178[A]:MET:HE1  | 9:K:4[A]:GOL:C3     | 2.44                     | 0.47              |
| 1:F:177:ALA:O       | 1:F:189:ILE:HD12    | 2.15                     | 0.46              |
| 7:H:1004:FMT:C      | 9:K:3:GOL:H31       | 2.45                     | 0.46              |
| 1:A:239:VAL:HB      | 9:K:8[B]:GOL:O1     | 2.15                     | 0.46              |
| 1:A:341[B]:ARG:NH1  | 1:A:341[B]:ARG:HB3  | 2.30                     | 0.46              |
| 1:D:260:LEU:HD11    | 1:D:370[B]:LEU:HD21 | 1.97                     | 0.46              |
| 4:E:127[B]:LEU:HD21 | 4:E:155:ALA:HB3     | 1.98                     | 0.46              |
| 2:B:103:ARG:HH12    | 7:H:1061:FMT:C      | 2.29                     | 0.46              |
| 2:B:133:ASP:O       | 2:B:136:VAL:HG22    | 2.16                     | 0.46              |
| 1:A:44[A]:ARG:NH2   | 7:H:943:FMT:O2      | 2.43                     | 0.46              |
| 1:D:402:ARG:HD3     | 1:D:404:ILE:HG13    | 1.98                     | 0.46              |
| 2:B:110[B]:LYS:HG3  | 2:B:116:ARG:NH1     | 2.30                     | 0.46              |

Continued on next page...



Continued from previous page...

| Atom-1             | Atom-2            | Interatomic distance (Å) | Clash overlap (Å) |
|--------------------|-------------------|--------------------------|-------------------|
| 1:D:46:PRO:HB2     | 1:D:47:TYR:CE1    | 2.50                     | 0.46              |
| 4:E:213:GLU:O      | 4:E:213:GLU:CG    | 2.64                     | 0.46              |
| 4:E:320:HIS:HD2    | 10:G:270:HOH:O    | 1.99                     | 0.46              |
| 1:A:355:HIS:ND1    | 7:H:950:FMT:C     | 2.79                     | 0.46              |
| 1:F:183:ARG:HB3    | 1:F:394:GLY:HA3   | 1.98                     | 0.46              |
| 1:F:207:ARG:NH1    | 10:G:296:HOH:O    | 2.49                     | 0.46              |
| 5:F:501:HEM:HMC2   | 5:F:501:HEM:HBC2  | 1.97                     | 0.46              |
| 2:B:35:ARG:HE      | 7:H:19:FMT:C      | 2.29                     | 0.45              |
| 3:C:12:ASP:OD1     | 3:C:12:ASP:N      | 2.49                     | 0.45              |
| 1:D:55:VAL:HG21    | 1:D:64:VAL:HG21   | 1.99                     | 0.45              |
| 4:E:170:LEU:HD22   | 4:E:174:PHE:CZ    | 2.50                     | 0.45              |
| 5:F:501:HEM:HBB2   | 5:F:501:HEM:CMB   | 2.45                     | 0.45              |
| 7:H:902:FMT:C      | 10:G:8:HOH:O      | 2.64                     | 0.45              |
| 1:D:34:LEU:O       | 1:D:38:GLU:C      | 2.54                     | 0.45              |
| 4:E:92:TRP:CG      | 9:K:4[A]:GOL:H12  | 2.50                     | 0.45              |
| 4:E:178[B]:MET:SD  | 4:E:193:GLN:HG3   | 2.56                     | 0.45              |
| 1:F:39:PRO:CB      | 1:F:57:ARG:HD2    | 2.45                     | 0.45              |
| 2:B:42[B]:ARG:H    | 7:H:970:FMT:C     | 2.29                     | 0.45              |
| 3:C:127:LEU:HD21   | 3:C:155:ALA:HB3   | 1.99                     | 0.45              |
| 5:D:501:HEM:HAB    | 5:D:501:HEM:HHC   | 1.56                     | 0.45              |
| 1:F:194:GLN:O      | 1:F:198:VAL:HG13  | 2.17                     | 0.45              |
| 2:B:42[A]:ARG:H    | 7:H:970:FMT:C     | 2.29                     | 0.45              |
| 1:D:127:LEU:HD23   | 1:D:152:PHE:CD1   | 2.52                     | 0.45              |
| 1:F:259:LEU:HB2    | 1:F:284[A]:MET:CE | 2.46                     | 0.45              |
| 3:C:72:THR:HG23    | 9:K:1[B]:GOL:H11  | 1.99                     | 0.45              |
| 4:E:215:LEU:HD23   | 4:E:215:LEU:HA    | 1.86                     | 0.45              |
| 4:E:186:ALA:O      | 4:E:190:GLN:HG3   | 2.17                     | 0.45              |
| 1:D:252[B]:GLN:OE1 | 1:D:252[B]:GLN:HA | 2.16                     | 0.45              |
| 3:C:92[B]:TRP:HE1  | 6:Z:502:DEB:HO9   | 1.64                     | 0.45              |
| 4:E:33:GLU:HA      | 4:E:36:ARG:NH2    | 2.32                     | 0.45              |
| 2:B:312[A]:ARG:HB3 | 3:C:375:ARG:HH21  | 1.81                     | 0.45              |
| 2:B:344:ASN:N      | 10:G:1035:HOH:O   | 2.24                     | 0.45              |
| 4:E:178[A]:MET:HE2 | 9:K:4[A]:GOL:C3   | 2.46                     | 0.45              |
| 1:F:246:HIS:O      | 1:F:250:VAL:HG23  | 2.17                     | 0.45              |
| 2:B:205:ALA:O      | 2:B:208:ARG:HG2   | 2.16                     | 0.44              |
| 3:C:283:GLU:HG3    | 3:C:337:LEU:CD2   | 2.47                     | 0.44              |
| 3:C:305[B]:GLU:HG3 | 7:H:1024:FMT:O1   | 2.17                     | 0.44              |
| 1:A:174:PHE:HB3    | 1:A:196:PHE:CD2   | 2.53                     | 0.44              |
| 1:D:35[B]:ARG:HG3  | 1:D:57[B]:ARG:CG  | 2.44                     | 0.44              |
| 1:F:333:HIS:CE1    | 1:F:338:ASP:OD2   | 2.60                     | 0.44              |
| 1:A:220:ALA:O      | 1:A:223:THR:HB    | 2.18                     | 0.44              |

Continued on next page...

Continued from previous page...

| Atom-1             | Atom-2              | Interatomic distance (Å) | Clash overlap (Å) |
|--------------------|---------------------|--------------------------|-------------------|
| 2:B:92:TRP:HA      | 2:B:236[A]:ASN:HD21 | 1.75                     | 0.44              |
| 2:B:178[B]:MET:CE  | 2:B:193:GLN:HE21    | 2.30                     | 0.44              |
| 2:B:312[A]:ARG:HB3 | 3:C:375:ARG:NH2     | 2.33                     | 0.44              |
| 2:B:305:GLU:HG3    | 7:H:1008:FMT:H      | 1.99                     | 0.44              |
| 1:D:267:TYR:CZ     | 1:D:380:LEU:HD23    | 2.50                     | 0.44              |
| 1:D:335:ASP:OD1    | 7:H:960:FMT:O2      | 2.36                     | 0.44              |
| 1:F:168:ARG:O      | 1:F:172:ARG:HG3     | 2.17                     | 0.44              |
| 1:A:107:LEU:HD11   | 1:A:222:ALA:HB2     | 1.99                     | 0.44              |
| 2:B:42[A]:ARG:NH2  | 7:H:915:FMT:O2      | 2.51                     | 0.44              |
| 1:A:92[B]:TRP:CZ2  | 6:A:502:DEB:H5      | 2.53                     | 0.44              |
| 1:A:383:ALA:HB3    | 1:A:404:ILE:HG22    | 1.99                     | 0.44              |
| 2:B:236[A]:ASN:CG  | 9:K:7[A]:GOL:C2     | 2.71                     | 0.44              |
| 2:B:106[A]:ARG:NH2 | 10:G:1286:HOH:O     | 2.50                     | 0.44              |
| 2:B:392:LYS:HG2    | 2:B:401:GLU:HG3     | 2.00                     | 0.44              |
| 1:F:145:VAL:HG21   | 1:F:402:ARG:HA      | 1.99                     | 0.44              |
| 1:A:246:HIS:O      | 1:A:250:VAL:HG23    | 2.17                     | 0.43              |
| 3:C:69:ARG:HH12    | 7:H:1024:FMT:C      | 2.31                     | 0.43              |
| 1:A:133:ASP:HA     | 1:A:136:VAL:HG22    | 2.00                     | 0.43              |
| 3:C:271:VAL:HA     | 3:C:374:VAL:CG1     | 2.49                     | 0.43              |
| 4:E:259:LEU:HB2    | 4:E:284[A]:MET:CE   | 2.48                     | 0.43              |
| 1:F:267:TYR:CE1    | 1:F:374:VAL:HG22    | 2.53                     | 0.43              |
| 1:F:380:LEU:HG     | 1:F:405:VAL:CG1     | 2.48                     | 0.43              |
| 1:A:58[B]:MET:SD   | 1:A:324:ALA:O       | 2.75                     | 0.43              |
| 1:D:58[B]:MET:HE1  | 1:D:347:ILE:HG21    | 1.99                     | 0.43              |
| 1:F:384:GLU:OE1    | 1:F:402:ARG:NH1     | 2.51                     | 0.43              |
| 2:B:110[B]:LYS:HD2 | 2:B:110[B]:LYS:HA   | 1.63                     | 0.43              |
| 1:F:148:LEU:O      | 1:F:152:PHE:HB3     | 2.18                     | 0.43              |
| 1:A:57[A]:ARG:NH1  | 1:A:307:SER:HB2     | 2.34                     | 0.43              |
| 2:B:27:LEU:HD12    | 2:B:326[A]:ARG:CZ   | 2.49                     | 0.43              |
| 2:B:152:PHE:HB3    | 2:B:153:PRO:HD3     | 2.01                     | 0.43              |
| 6:B:502:DEB:O19    | 9:K:7[B]:GOL:C3     | 2.65                     | 0.43              |
| 5:D:501:HEM:HBC2   | 5:D:501:HEM:HMC2    | 2.00                     | 0.43              |
| 4:E:107:LEU:HD11   | 4:E:229:LEU:HD13    | 2.00                     | 0.43              |
| 1:F:284[B]:MET:HE1 | 1:F:370:LEU:HD11    | 2.01                     | 0.43              |
| 1:A:263:GLU:HB2    | 1:A:266:ARG:HD2     | 2.00                     | 0.43              |
| 1:F:27:LEU:HD12    | 1:F:326:ARG:NH1     | 2.33                     | 0.43              |
| 1:F:141:PRO:HB2    | 1:F:404:ILE:HG22    | 1.99                     | 0.43              |
| 1:A:152:PHE:HB3    | 1:A:153:PRO:HD3     | 2.01                     | 0.43              |
| 1:A:377:PHE:N      | 1:A:378:PRO:HD3     | 2.34                     | 0.43              |
| 3:C:258:HIS:CE1    | 3:C:262:THR:HG21    | 2.54                     | 0.43              |
| 1:D:343:ARG:HG2    | 1:D:345:PRO:HD3     | 1.99                     | 0.43              |

Continued on next page...

Continued from previous page...

| Atom-1              | Atom-2              | Interatomic distance (Å) | Clash overlap (Å) |
|---------------------|---------------------|--------------------------|-------------------|
| 4:E:231:LYS:O       | 4:E:235:VAL:HG23    | 2.18                     | 0.43              |
| 1:F:266:ARG:HE      | 1:F:337:LEU:HD12    | 1.75                     | 0.43              |
| 1:A:35[B]:ARG:HH21  | 9:K:13:GOL:C1       | 2.32                     | 0.43              |
| 4:E:286:ARG:HD3     | 4:E:344:ASN:OD1     | 2.19                     | 0.43              |
| 1:F:17:TYR:CD1      | 1:F:18:PRO:HA       | 2.53                     | 0.43              |
| 4:E:58[B]:MET:HA    | 4:E:324:ALA:HB1     | 1.99                     | 0.43              |
| 2:B:355:HIS:NE2     | 7:H:31:FMT:O1       | 2.46                     | 0.43              |
| 4:E:106[A]:ARG:HH21 | 4:E:106[A]:ARG:HB3  | 1.84                     | 0.43              |
| 4:E:128:VAL:HG23    | 4:E:152:PHE:CE1     | 2.54                     | 0.43              |
| 1:F:120:MET:O       | 1:F:124:VAL:HG23    | 2.19                     | 0.43              |
| 1:F:342:GLU:C       | 1:F:343:ARG:HG3     | 2.39                     | 0.43              |
| 1:A:89[B]:GLU:HG2   | 1:A:92[B]:TRP:HB2   | 2.01                     | 0.42              |
| 1:A:105[B]:ARG:NH2  | 7:H:950:FMT:C       | 2.82                     | 0.42              |
| 4:E:46:PRO:HB2      | 4:E:47:TYR:CD2      | 2.54                     | 0.42              |
| 2:B:392:LYS:HG3     | 2:B:399:GLY:O       | 2.19                     | 0.42              |
| 3:C:44[A]:ARG:NE    | 10:G:1047:HOH:O     | 2.27                     | 0.42              |
| 3:C:332:ASP:HB3     | 7:H:928:FMT:C       | 2.48                     | 0.42              |
| 1:D:166[B]:GLU:CG   | 4:E:228:HIS:NE2     | 2.78                     | 0.42              |
| 1:D:227:ASP:O       | 1:D:228:HIS:HB2     | 2.19                     | 0.42              |
| 1:D:392:LYS:HG3     | 1:D:399:GLY:O       | 2.19                     | 0.42              |
| 4:E:104:LEU:HD12    | 4:E:107:LEU:CD1     | 2.49                     | 0.42              |
| 1:F:309[A]:VAL:HG12 | 1:F:310:THR:N       | 2.34                     | 0.42              |
| 2:B:92:TRP:CE3      | 9:K:7[B]:GOL:H32    | 2.55                     | 0.42              |
| 2:B:106[A]:ARG:CZ   | 7:H:1060:FMT:C      | 2.97                     | 0.42              |
| 1:D:322:ALA:O       | 1:D:326:ARG:HG2     | 2.20                     | 0.42              |
| 4:E:290:LEU:O       | 4:E:397:ILE:HA      | 2.18                     | 0.42              |
| 1:A:256:LEU:HD22    | 1:A:284:MET:CB      | 2.47                     | 0.42              |
| 1:D:83[A]:MET:HE3   | 10:G:243:HOH:O      | 2.19                     | 0.42              |
| 1:D:101:HIS:HE1     | 1:D:353:ALA:O       | 2.02                     | 0.42              |
| 4:E:105:ARG:NH2     | 4:E:355:HIS:O       | 2.28                     | 0.42              |
| 4:E:259:LEU:HB2     | 4:E:284[A]:MET:HE1  | 2.01                     | 0.42              |
| 2:B:8[A]:PRO:HB3    | 2:B:12:ASP:HB2      | 2.00                     | 0.42              |
| 2:B:390:LYS:HE3     | 2:B:402[A]:ARG:HH21 | 1.84                     | 0.42              |
| 1:D:219:LEU:O       | 1:D:222:ALA:HB3     | 2.20                     | 0.42              |
| 1:F:376:ARG:HE      | 1:F:376:ARG:HB3     | 1.70                     | 0.42              |
| 1:A:375[B]:ARG:HG3  | 1:A:375[B]:ARG:NH2  | 2.35                     | 0.42              |
| 2:B:174:PHE:O       | 2:B:178[B]:MET:HG2  | 2.20                     | 0.42              |
| 3:C:8:PRO:C         | 3:C:10:PRO:HD2      | 2.40                     | 0.42              |
| 1:A:295:SER:CB      | 1:A:319[A]:VAL:HG22 | 2.49                     | 0.42              |
| 2:B:9[A]:THR:OG1    | 2:B:10[A]:PRO:CD    | 2.68                     | 0.42              |
| 2:B:161:LEU:O       | 2:B:216[B]:LEU:CD1  | 2.54                     | 0.42              |

Continued on next page...



Continued from previous page...

| Atom-1            | Atom-2              | Interatomic distance (Å) | Clash overlap (Å) |
|-------------------|---------------------|--------------------------|-------------------|
| 1:A:165:LEU:HD12  | 1:A:165:LEU:HA      | 1.79                     | 0.41              |
| 4:E:328:GLU:HB2   | 10:G:273:HOH:O      | 2.19                     | 0.41              |
| 1:A:38[A]:GLU:CD  | 1:A:41:SER:HB3      | 2.41                     | 0.41              |
| 1:A:355:HIS:HE2   | 7:H:951:FMT:C       | 2.32                     | 0.41              |
| 5:B:501:HEM:HBB2  | 5:B:501:HEM:HMB2    | 2.02                     | 0.41              |
| 1:A:244:ALA:HB1   | 5:A:501:HEM:C4C     | 2.55                     | 0.41              |
| 2:B:287:TYR:O     | 2:B:326[A]:ARG:NH1  | 2.54                     | 0.41              |
| 1:D:188:GLU:OE1   | 7:H:66:FMT:O1       | 2.37                     | 0.41              |
| 1:A:58[B]:MET:CG  | 1:A:324:ALA:O       | 2.68                     | 0.41              |
| 2:B:161:LEU:CA    | 2:B:216[B]:LEU:HD13 | 2.50                     | 0.41              |
| 1:F:271:VAL:CG2   | 1:F:374:VAL:HG13    | 2.48                     | 0.41              |
| 1:F:152:PHE:HB3   | 1:F:153:PRO:HD3     | 2.02                     | 0.41              |
| 1:F:259:LEU:HA    | 1:F:262:THR:HG22    | 2.03                     | 0.41              |
| 1:D:256:LEU:HD12  | 1:D:370[A]:LEU:CD1  | 2.48                     | 0.41              |
| 4:E:86:THR:HG21   | 4:E:189:ILE:HG22    | 2.02                     | 0.41              |
| 1:F:280:ALA:O     | 1:F:284[B]:MET:HG3  | 2.19                     | 0.41              |
| 1:A:183:ARG:HD2   | 7:H:911:FMT:O1      | 2.21                     | 0.41              |
| 2:B:101:HIS:CE1   | 2:B:105[B]:ARG:HD3  | 2.56                     | 0.41              |
| 2:B:124:VAL:HG13  | 2:B:152:PHE:HE1     | 1.86                     | 0.41              |
| 1:D:256:LEU:CD1   | 1:D:370[A]:LEU:HD11 | 2.51                     | 0.41              |
| 4:E:208:ARG:NH1   | 4:E:223:THR:HG22    | 2.36                     | 0.41              |
| 2:B:11[A]:ALA:O   | 2:B:44:ARG:NH2      | 2.54                     | 0.41              |
| 3:C:382:LEU:HD12  | 3:C:382:LEU:HA      | 1.97                     | 0.41              |
| 7:H:1040:FMT:H    | 10:G:1040:HOH:O     | 2.20                     | 0.41              |
| 1:A:252:GLN:OE1   | 1:A:252:GLN:HA      | 2.21                     | 0.40              |
| 1:A:258:HIS:HD2   | 10:G:721:HOH:O      | 2.03                     | 0.40              |
| 1:D:83[B]:MET:HE2 | 1:D:318:VAL:HG11    | 2.02                     | 0.40              |
| 4:E:178[B]:MET:CE | 4:E:178[B]:MET:HA   | 2.51                     | 0.40              |
| 1:F:161:LEU:CD2   | 1:F:215:LEU:HD12    | 2.43                     | 0.40              |
| 1:D:23:HIS:O      | 1:D:26:ASP:HB2      | 2.21                     | 0.40              |
| 1:A:337:LEU:HD23  | 1:A:337:LEU:HA      | 1.91                     | 0.40              |
| 3:C:92[B]:TRP:HZ3 | 7:H:1046:FMT:O1     | 2.04                     | 0.40              |
| 1:D:58[B]:MET:HA  | 1:D:58[B]:MET:CE    | 2.51                     | 0.40              |
| 1:D:290:LEU:O     | 1:D:397:ILE:HA      | 2.21                     | 0.40              |
| 4:E:204:VAL:HG13  | 4:E:220:ALA:HB2     | 2.04                     | 0.40              |
| 1:F:281:VAL:HA    | 1:F:284[B]:MET:HE3  | 2.02                     | 0.40              |
| 1:F:373:LEU:HD23  | 1:F:373:LEU:HA      | 1.91                     | 0.40              |
| 2:B:252:GLN:HA    | 2:B:252:GLN:OE1     | 2.21                     | 0.40              |
| 1:A:256:LEU:CD1   | 1:A:370:LEU:HD11    | 2.51                     | 0.40              |
| 2:B:170:LEU:HD12  | 2:B:170:LEU:HA      | 1.96                     | 0.40              |
| 3:C:42[A]:ARG:HG2 | 3:C:53:TRP:CE3      | 2.57                     | 0.40              |

Continued on next page...

Continued from previous page...

| Atom-1          | Atom-2          | Interatomic distance (Å) | Clash overlap (Å) |
|-----------------|-----------------|--------------------------|-------------------|
| 1:D:286:ARG:HG3 | 1:D:325:ASN:HB3 | 2.03                     | 0.40              |

All (2) symmetry-related close contacts are listed below. The label for Atom-2 includes the symmetry operator and encoded unit-cell translations to be applied.

| Atom-1          | Atom-2                 | Interatomic distance (Å) | Clash overlap (Å) |
|-----------------|------------------------|--------------------------|-------------------|
| 7:H:32:FMT:O2   | 10:G:680:HOH:O[3_555]  | 2.11                     | 0.09              |
| 2:B:302:GLU:OE2 | 3:C:208:ARG:NH2[4_556] | 2.14                     | 0.06              |

## 5.3 Torsion angles [i](#)

### 5.3.1 Protein backbone [i](#)

In the following table, the Percentiles column shows the percent Ramachandran outliers of the chain as a percentile score with respect to all X-ray entries followed by that with respect to entries of similar resolution.

The Analysed column shows the number of residues for which the backbone conformation was analysed, and the total number of residues.

| Mol | Chain | Analysed         | Favoured   | Allowed  | Outliers | Percentiles |     |
|-----|-------|------------------|------------|----------|----------|-------------|-----|
| 1   | A     | 426/396 (108%)   | 413 (97%)  | 13 (3%)  | 0        | 100         | 100 |
| 1   | D     | 410/396 (104%)   | 388 (95%)  | 22 (5%)  | 0        | 100         | 100 |
| 1   | F     | 400/396 (101%)   | 375 (94%)  | 24 (6%)  | 1 (0%)   | 41          | 39  |
| 2   | B     | 433/402 (108%)   | 415 (96%)  | 17 (4%)  | 1 (0%)   | 47          | 47  |
| 3   | C     | 435/408 (107%)   | 426 (98%)  | 9 (2%)   | 0        | 100         | 100 |
| 4   | E     | 402/395 (102%)   | 385 (96%)  | 17 (4%)  | 0        | 100         | 100 |
| All | All   | 2506/2393 (105%) | 2402 (96%) | 102 (4%) | 2 (0%)   | 51          | 53  |

All (2) Ramachandran outliers are listed below:

| Mol | Chain | Res | Type |
|-----|-------|-----|------|
| 1   | F     | 264 | ARG  |
| 2   | B     | 68  | SER  |

### 5.3.2 Protein sidechains ⓘ

In the following table, the Percentiles column shows the percent sidechain outliers of the chain as a percentile score with respect to all X-ray entries followed by that with respect to entries of similar resolution.

The Analysed column shows the number of residues for which the sidechain conformation was analysed, and the total number of residues.

| Mol | Chain | Analysed         | Rotameric  | Outliers | Percentiles |    |
|-----|-------|------------------|------------|----------|-------------|----|
| 1   | A     | 365/333 (110%)   | 356 (98%)  | 9 (2%)   | 47          | 50 |
| 1   | D     | 349/333 (105%)   | 342 (98%)  | 7 (2%)   | 55          | 59 |
| 1   | F     | 339/333 (102%)   | 334 (98%)  | 5 (2%)   | 65          | 69 |
| 2   | B     | 369/337 (110%)   | 362 (98%)  | 7 (2%)   | 57          | 61 |
| 3   | C     | 372/343 (108%)   | 367 (99%)  | 5 (1%)   | 69          | 74 |
| 4   | E     | 341/332 (103%)   | 334 (98%)  | 7 (2%)   | 53          | 57 |
| All | All   | 2135/2011 (106%) | 2095 (98%) | 40 (2%)  | 60          | 61 |

All (40) residues with a non-rotameric sidechain are listed below:

| Mol | Chain | Res    | Type |
|-----|-------|--------|------|
| 1   | A     | 166    | GLU  |
| 1   | A     | 183    | ARG  |
| 1   | A     | 190    | GLN  |
| 1   | A     | 191[A] | ARG  |
| 1   | A     | 191[B] | ARG  |
| 1   | A     | 196    | PHE  |
| 1   | A     | 224    | ASP  |
| 1   | A     | 337    | LEU  |
| 1   | A     | 381    | ASP  |
| 2   | B     | 9[A]   | THR  |
| 2   | B     | 9[B]   | THR  |
| 2   | B     | 36     | ARG  |
| 2   | B     | 196    | PHE  |
| 2   | B     | 221    | LEU  |
| 2   | B     | 264[A] | ARG  |
| 2   | B     | 264[B] | ARG  |
| 3   | C     | 12     | ASP  |
| 3   | C     | 27[A]  | LEU  |
| 3   | C     | 27[B]  | LEU  |
| 3   | C     | 116    | ARG  |
| 3   | C     | 196    | PHE  |
| 1   | D     | 89     | GLU  |

*Continued on next page...*

Continued from previous page...

| Mol | Chain | Res    | Type |
|-----|-------|--------|------|
| 1   | D     | 94     | LEU  |
| 1   | D     | 115[A] | ARG  |
| 1   | D     | 115[B] | ARG  |
| 1   | D     | 196    | PHE  |
| 1   | D     | 207    | ARG  |
| 1   | D     | 312    | ARG  |
| 4   | E     | 42     | ARG  |
| 4   | E     | 106[A] | ARG  |
| 4   | E     | 106[B] | ARG  |
| 4   | E     | 196    | PHE  |
| 4   | E     | 225    | ASN  |
| 4   | E     | 264    | ARG  |
| 4   | E     | 326    | ARG  |
| 1   | F     | 42     | ARG  |
| 1   | F     | 183    | ARG  |
| 1   | F     | 196    | PHE  |
| 1   | F     | 231    | LYS  |
| 1   | F     | 312    | ARG  |

Sometimes sidechains can be flipped to improve hydrogen bonding and reduce clashes. All (7) such sidechains are listed below:

| Mol | Chain | Res | Type |
|-----|-------|-----|------|
| 1   | A     | 228 | HIS  |
| 2   | B     | 193 | GLN  |
| 3   | C     | 0   | HIS  |
| 3   | C     | 190 | GLN  |
| 3   | C     | 236 | ASN  |
| 4   | E     | 225 | ASN  |
| 1   | F     | 333 | HIS  |

### 5.3.3 RNA ⓘ

There are no RNA molecules in this entry.

## 5.4 Non-standard residues in protein, DNA, RNA chains ⓘ

There are no non-standard protein/DNA/RNA residues in this entry.

## 5.5 Carbohydrates [i](#)

There are no monosaccharides in this entry.

## 5.6 Ligand geometry [i](#)

Of 172 ligands modelled in this entry, 8 are monoatomic - leaving 164 for Mogul analysis.

In the following table, the Counts columns list the number of bonds (or angles) for which Mogul statistics could be retrieved, the number of bonds (or angles) that are observed in the model and the number of bonds (or angles) that are defined in the Chemical Component Dictionary. The Link column lists molecule types, if any, to which the group is linked. The Z score for a bond length (or angle) is the number of standard deviations the observed value is removed from the expected value. A bond length (or angle) with  $|Z| > 2$  is considered an outlier worth inspection. RMSZ is the root-mean-square of all Z scores of the bond lengths (or angles).

| Mol | Type | Chain | Res  | Link | Bond lengths |      |             | Bond angles |      |             |
|-----|------|-------|------|------|--------------|------|-------------|-------------|------|-------------|
|     |      |       |      |      | Counts       | RMSZ | $\# Z  > 2$ | Counts      | RMSZ | $\# Z  > 2$ |
| 6   | DEB  | E     | 502  | -    | 27,27,27     | 0.50 | 0           | 35,39,39    | 0.77 | 0           |
| 7   | FMT  | H     | 62   | -    | 0,2,2        | -    | -           | 0,1,1       | -    | -           |
| 7   | FMT  | H     | 905  | -    | 0,2,2        | -    | -           | 0,1,1       | -    | -           |
| 7   | FMT  | H     | 929  | -    | 0,2,2        | -    | -           | 0,1,1       | -    | -           |
| 7   | FMT  | H     | 1030 | -    | 0,2,2        | -    | -           | 0,1,1       | -    | -           |
| 7   | FMT  | H     | 93   | -    | 0,2,2        | -    | -           | 0,1,1       | -    | -           |
| 7   | FMT  | H     | 1015 | -    | 0,2,2        | -    | -           | 0,1,1       | -    | -           |
| 7   | FMT  | H     | 920  | -    | 0,2,2        | -    | -           | 0,1,1       | -    | -           |
| 7   | FMT  | H     | 31   | -    | 0,2,2        | -    | -           | 0,1,1       | -    | -           |
| 7   | FMT  | H     | 1047 | -    | 0,2,2        | -    | -           | 0,1,1       | -    | -           |
| 7   | FMT  | H     | 904  | -    | 0,2,2        | -    | -           | 0,1,1       | -    | -           |
| 7   | FMT  | H     | 1018 | -    | 0,2,2        | -    | -           | 0,1,1       | -    | -           |
| 7   | FMT  | H     | 12   | -    | 0,2,2        | -    | -           | 0,1,1       | -    | -           |
| 7   | FMT  | H     | 1023 | -    | 0,2,2        | -    | -           | 0,1,1       | -    | -           |
| 7   | FMT  | H     | 961  | -    | 0,2,2        | -    | -           | 0,1,1       | -    | -           |
| 7   | FMT  | H     | 979  | -    | 0,2,2        | -    | -           | 0,1,1       | -    | -           |
| 7   | FMT  | H     | 906  | -    | 0,2,2        | -    | -           | 0,1,1       | -    | -           |
| 7   | FMT  | H     | 1069 | -    | 0,2,2        | -    | -           | 0,1,1       | -    | -           |
| 7   | FMT  | H     | 989  | -    | 0,2,2        | -    | -           | 0,1,1       | -    | -           |
| 7   | FMT  | H     | 969  | -    | 0,2,2        | -    | -           | 0,1,1       | -    | -           |
| 7   | FMT  | H     | 995  | -    | 0,2,2        | -    | -           | 0,1,1       | -    | -           |
| 7   | FMT  | H     | 65   | -    | 0,2,2        | -    | -           | 0,1,1       | -    | -           |
| 7   | FMT  | H     | 1065 | -    | 0,2,2        | -    | -           | 0,1,1       | -    | -           |
| 7   | FMT  | H     | 915  | -    | 0,2,2        | -    | -           | 0,1,1       | -    | -           |
| 5   | HEM  | F     | 501  | 1    | 27,50,50     | 0.90 | 1 (3%)      | 17,82,82    | 1.64 | 4 (23%)     |
| 7   | FMT  | H     | 945  | -    | 0,2,2        | -    | -           | 0,1,1       | -    | -           |
| 7   | FMT  | H     | 1061 | -    | 0,2,2        | -    | -           | 0,1,1       | -    | -           |

| Mol | Type | Chain | Res  | Link | Bond lengths |      |          | Bond angles |      |          |
|-----|------|-------|------|------|--------------|------|----------|-------------|------|----------|
|     |      |       |      |      | Counts       | RMSZ | # Z  > 2 | Counts      | RMSZ | # Z  > 2 |
| 7   | FMT  | H     | 41   | -    | 0,2,2        | -    | -        | 0,1,1       | -    | -        |
| 7   | FMT  | H     | 982  | -    | 0,2,2        | -    | -        | 0,1,1       | -    | -        |
| 7   | FMT  | H     | 1058 | -    | 0,2,2        | -    | -        | 0,1,1       | -    | -        |
| 7   | FMT  | H     | 981  | -    | 0,2,2        | -    | -        | 0,1,1       | -    | -        |
| 7   | FMT  | H     | 1025 | -    | 0,2,2        | -    | -        | 0,1,1       | -    | -        |
| 5   | HEM  | E     | 501  | 4    | 27,50,50     | 1.44 | 5 (18%)  | 17,82,82    | 2.35 | 7 (41%)  |
| 7   | FMT  | H     | 1021 | -    | 0,2,2        | -    | -        | 0,1,1       | -    | -        |
| 6   | DEB  | A     | 502  | -    | 27,27,27     | 0.26 | 0        | 35,39,39    | 0.51 | 0        |
| 7   | FMT  | H     | 972  | -    | 0,2,2        | -    | -        | 0,1,1       | -    | -        |
| 9   | GOL  | K     | 13   | -    | 5,5,5        | 0.20 | 0        | 5,5,5       | 0.65 | 0        |
| 9   | GOL  | K     | 7[B] | -    | 5,5,5        | 0.23 | 0        | 5,5,5       | 0.43 | 0        |
| 7   | FMT  | H     | 58   | -    | 0,2,2        | -    | -        | 0,1,1       | -    | -        |
| 7   | FMT  | H     | 946  | -    | 0,2,2        | -    | -        | 0,1,1       | -    | -        |
| 7   | FMT  | H     | 95   | -    | 0,2,2        | -    | -        | 0,1,1       | -    | -        |
| 7   | FMT  | H     | 74   | -    | 0,2,2        | -    | -        | 0,1,1       | -    | -        |
| 7   | FMT  | H     | 1008 | -    | 0,2,2        | -    | -        | 0,1,1       | -    | -        |
| 7   | FMT  | H     | 965  | -    | 0,2,2        | -    | -        | 0,1,1       | -    | -        |
| 7   | FMT  | H     | 96   | -    | 0,2,2        | -    | -        | 0,1,1       | -    | -        |
| 9   | GOL  | K     | 8[B] | -    | 5,5,5        | 0.10 | 0        | 5,5,5       | 0.28 | 0        |
| 7   | FMT  | H     | 998  | -    | 0,2,2        | -    | -        | 0,1,1       | -    | -        |
| 7   | FMT  | H     | 933  | -    | 0,2,2        | -    | -        | 0,1,1       | -    | -        |
| 7   | FMT  | H     | 6    | -    | 0,2,2        | -    | -        | 0,1,1       | -    | -        |
| 7   | FMT  | H     | 941  | -    | 0,2,2        | -    | -        | 0,1,1       | -    | -        |
| 7   | FMT  | H     | 960  | -    | 0,2,2        | -    | -        | 0,1,1       | -    | -        |
| 7   | FMT  | H     | 1045 | -    | 0,2,2        | -    | -        | 0,1,1       | -    | -        |
| 7   | FMT  | H     | 33   | -    | 0,2,2        | -    | -        | 0,1,1       | -    | -        |
| 7   | FMT  | H     | 66   | -    | 0,2,2        | -    | -        | 0,1,1       | -    | -        |
| 9   | GOL  | K     | 1[A] | -    | 5,5,5        | 0.09 | 0        | 5,5,5       | 0.41 | 0        |
| 9   | GOL  | K     | 11   | -    | 5,5,5        | 0.14 | 0        | 5,5,5       | 0.32 | 0        |
| 7   | FMT  | H     | 1053 | -    | 0,2,2        | -    | -        | 0,1,1       | -    | -        |
| 7   | FMT  | H     | 56   | -    | 0,2,2        | -    | -        | 0,1,1       | -    | -        |
| 7   | FMT  | H     | 938  | -    | 0,2,2        | -    | -        | 0,1,1       | -    | -        |
| 7   | FMT  | H     | 1019 | -    | 0,2,2        | -    | -        | 0,1,1       | -    | -        |
| 7   | FMT  | H     | 94   | -    | 0,2,2        | -    | -        | 0,1,1       | -    | -        |
| 7   | FMT  | H     | 7    | -    | 0,2,2        | -    | -        | 0,1,1       | -    | -        |
| 7   | FMT  | H     | 1020 | -    | 0,2,2        | -    | -        | 0,1,1       | -    | -        |
| 7   | FMT  | H     | 996  | -    | 0,2,2        | -    | -        | 0,1,1       | -    | -        |
| 7   | FMT  | H     | 1046 | -    | 0,2,2        | -    | -        | 0,1,1       | -    | -        |
| 7   | FMT  | H     | 20   | -    | 0,2,2        | -    | -        | 0,1,1       | -    | -        |
| 7   | FMT  | H     | 27   | -    | 0,2,2        | -    | -        | 0,1,1       | -    | -        |
| 9   | GOL  | K     | 4[A] | -    | 5,5,5        | 0.09 | 0        | 5,5,5       | 0.30 | 0        |
| 7   | FMT  | H     | 971  | -    | 0,2,2        | -    | -        | 0,1,1       | -    | -        |
| 7   | FMT  | H     | 1003 | -    | 0,2,2        | -    | -        | 0,1,1       | -    | -        |

| Mol | Type | Chain | Res  | Link | Bond lengths |      |          | Bond angles |      |          |
|-----|------|-------|------|------|--------------|------|----------|-------------|------|----------|
|     |      |       |      |      | Counts       | RMSZ | # Z  > 2 | Counts      | RMSZ | # Z  > 2 |
| 7   | FMT  | H     | 901  | -    | 0,2,2        | -    | -        | 0,1,1       | -    | -        |
| 7   | FMT  | H     | 968  | -    | 0,2,2        | -    | -        | 0,1,1       | -    | -        |
| 7   | FMT  | H     | 910  | -    | 0,2,2        | -    | -        | 0,1,1       | -    | -        |
| 7   | FMT  | H     | 1036 | -    | 0,2,2        | -    | -        | 0,1,1       | -    | -        |
| 7   | FMT  | H     | 1028 | -    | 0,2,2        | -    | -        | 0,1,1       | -    | -        |
| 7   | FMT  | H     | 986  | -    | 0,2,2        | -    | -        | 0,1,1       | -    | -        |
| 7   | FMT  | H     | 1001 | -    | 0,2,2        | -    | -        | 0,1,1       | -    | -        |
| 7   | FMT  | H     | 937  | -    | 0,2,2        | -    | -        | 0,1,1       | -    | -        |
| 9   | GOL  | K     | 9    | -    | 5,5,5        | 0.26 | 0        | 5,5,5       | 0.56 | 0        |
| 9   | GOL  | K     | 7[A] | -    | 5,5,5        | 0.32 | 0        | 5,5,5       | 0.38 | 0        |
| 7   | FMT  | H     | 1033 | -    | 0,2,2        | -    | -        | 0,1,1       | -    | -        |
| 7   | FMT  | H     | 1010 | -    | 0,2,2        | -    | -        | 0,1,1       | -    | -        |
| 7   | FMT  | H     | 912  | -    | 0,2,2        | -    | -        | 0,1,1       | -    | -        |
| 7   | FMT  | H     | 70   | -    | 0,2,2        | -    | -        | 0,1,1       | -    | -        |
| 7   | FMT  | H     | 57   | -    | 0,2,2        | -    | -        | 0,1,1       | -    | -        |
| 7   | FMT  | H     | 976  | -    | 0,2,2        | -    | -        | 0,1,1       | -    | -        |
| 7   | FMT  | H     | 911  | -    | 0,2,2        | -    | -        | 0,1,1       | -    | -        |
| 7   | FMT  | H     | 914  | -    | 0,2,2        | -    | -        | 0,1,1       | -    | -        |
| 7   | FMT  | H     | 925  | -    | 0,2,2        | -    | -        | 0,1,1       | -    | -        |
| 7   | FMT  | H     | 1009 | -    | 0,2,2        | -    | -        | 0,1,1       | -    | -        |
| 9   | GOL  | K     | 3    | -    | 5,5,5        | 0.22 | 0        | 5,5,5       | 0.59 | 0        |
| 7   | FMT  | H     | 934  | -    | 0,2,2        | -    | -        | 0,1,1       | -    | -        |
| 7   | FMT  | H     | 980  | -    | 0,2,2        | -    | -        | 0,1,1       | -    | -        |
| 7   | FMT  | H     | 1044 | -    | 0,2,2        | -    | -        | 0,1,1       | -    | -        |
| 9   | GOL  | K     | 5    | -    | 5,5,5        | 0.13 | 0        | 5,5,5       | 0.31 | 0        |
| 7   | FMT  | H     | 928  | -    | 0,2,2        | -    | -        | 0,1,1       | -    | -        |
| 7   | FMT  | H     | 931  | -    | 0,2,2        | -    | -        | 0,1,1       | -    | -        |
| 7   | FMT  | H     | 1068 | -    | 0,2,2        | -    | -        | 0,1,1       | -    | -        |
| 7   | FMT  | H     | 951  | -    | 0,2,2        | -    | -        | 0,1,1       | -    | -        |
| 7   | FMT  | H     | 984  | -    | 0,2,2        | -    | -        | 0,1,1       | -    | -        |
| 7   | FMT  | H     | 13   | -    | 0,2,2        | -    | -        | 0,1,1       | -    | -        |
| 7   | FMT  | H     | 10   | -    | 0,2,2        | -    | -        | 0,1,1       | -    | -        |
| 7   | FMT  | H     | 921  | -    | 0,2,2        | -    | -        | 0,1,1       | -    | -        |
| 5   | HEM  | C     | 501  | 3    | 27,50,50     | 1.15 | 4 (14%)  | 17,82,82    | 1.77 | 6 (35%)  |
| 6   | DEB  | D     | 502  | -    | 27,27,27     | 0.22 | 0        | 35,39,39    | 0.47 | 0        |
| 7   | FMT  | H     | 923  | -    | 0,2,2        | -    | -        | 0,1,1       | -    | -        |
| 7   | FMT  | H     | 1064 | -    | 0,2,2        | -    | -        | 0,1,1       | -    | -        |
| 7   | FMT  | H     | 902  | 8    | 0,2,2        | -    | -        | 0,1,1       | -    | -        |
| 7   | FMT  | H     | 8    | -    | 0,2,2        | -    | -        | 0,1,1       | -    | -        |
| 7   | FMT  | H     | 1060 | -    | 0,2,2        | -    | -        | 0,1,1       | -    | -        |
| 7   | FMT  | H     | 72   | -    | 0,2,2        | -    | -        | 0,1,1       | -    | -        |
| 7   | FMT  | H     | 947  | -    | 0,2,2        | -    | -        | 0,1,1       | -    | -        |



| Mol | Type | Chain | Res  | Link | Bond lengths |      |          | Bond angles |      |          |
|-----|------|-------|------|------|--------------|------|----------|-------------|------|----------|
|     |      |       |      |      | Counts       | RMSZ | # Z  > 2 | Counts      | RMSZ | # Z  > 2 |
| 6   | DEB  | B     | 502  | -    | 27,27,27     | 0.51 | 0        | 35,39,39    | 1.08 | 2 (5%)   |
| 7   | FMT  | H     | 926  | -    | 0,2,2        | -    | -        | 0,1,1       | -    | -        |
| 7   | FMT  | H     | 1038 | -    | 0,2,2        | -    | -        | 0,1,1       | -    | -        |
| 7   | FMT  | H     | 922  | -    | 0,2,2        | -    | -        | 0,1,1       | -    | -        |
| 7   | FMT  | H     | 935  | -    | 0,2,2        | -    | -        | 0,1,1       | -    | -        |
| 7   | FMT  | H     | 1014 | -    | 0,2,2        | -    | -        | 0,1,1       | -    | -        |
| 7   | FMT  | H     | 1040 | -    | 0,2,2        | -    | -        | 0,1,1       | -    | -        |
| 7   | FMT  | H     | 67   | -    | 0,2,2        | -    | -        | 0,1,1       | -    | -        |
| 7   | FMT  | H     | 918  | -    | 0,2,2        | -    | -        | 0,1,1       | -    | -        |
| 7   | FMT  | H     | 601  | -    | 0,2,2        | -    | -        | 0,1,1       | -    | -        |
| 7   | FMT  | H     | 943  | -    | 0,2,2        | -    | -        | 0,1,1       | -    | -        |
| 7   | FMT  | H     | 944  | -    | 0,2,2        | -    | -        | 0,1,1       | -    | -        |
| 6   | DEB  | Z     | 502  | -    | 27,27,27     | 0.27 | 0        | 35,39,39    | 0.61 | 1 (2%)   |
| 7   | FMT  | H     | 1006 | -    | 0,2,2        | -    | -        | 0,1,1       | -    | -        |
| 7   | FMT  | H     | 1005 | -    | 0,2,2        | -    | -        | 0,1,1       | -    | -        |
| 7   | FMT  | H     | 1048 | -    | 0,2,2        | -    | -        | 0,1,1       | -    | -        |
| 9   | GOL  | K     | 8[A] | -    | 5,5,5        | 0.24 | 0        | 5,5,5       | 0.48 | 0        |
| 7   | FMT  | H     | 917  | -    | 0,2,2        | -    | -        | 0,1,1       | -    | -        |
| 9   | GOL  | K     | 1[B] | -    | 5,5,5        | 0.22 | 0        | 5,5,5       | 0.65 | 0        |
| 7   | FMT  | H     | 14   | -    | 0,2,2        | -    | -        | 0,1,1       | -    | -        |
| 7   | FMT  | H     | 913  | -    | 0,2,2        | -    | -        | 0,1,1       | -    | -        |
| 7   | FMT  | H     | 11   | -    | 0,2,2        | -    | -        | 0,1,1       | -    | -        |
| 7   | FMT  | H     | 29   | -    | 0,2,2        | -    | -        | 0,1,1       | -    | -        |
| 7   | FMT  | H     | 32   | -    | 0,2,2        | -    | -        | 0,1,1       | -    | -        |
| 7   | FMT  | H     | 909  | -    | 0,2,2        | -    | -        | 0,1,1       | -    | -        |
| 7   | FMT  | H     | 939  | -    | 0,2,2        | -    | -        | 0,1,1       | -    | -        |
| 7   | FMT  | H     | 1007 | -    | 0,2,2        | -    | -        | 0,1,1       | -    | -        |
| 7   | FMT  | H     | 64   | -    | 0,2,2        | -    | -        | 0,1,1       | -    | -        |
| 7   | FMT  | H     | 966  | -    | 0,2,2        | -    | -        | 0,1,1       | -    | -        |
| 7   | FMT  | H     | 1024 | -    | 0,2,2        | -    | -        | 0,1,1       | -    | -        |
| 9   | GOL  | K     | 4[B] | -    | 5,5,5        | 0.09 | 0        | 5,5,5       | 0.29 | 0        |
| 7   | FMT  | H     | 21   | -    | 0,2,2        | -    | -        | 0,1,1       | -    | -        |
| 7   | FMT  | H     | 40   | -    | 0,2,2        | -    | -        | 0,1,1       | -    | -        |
| 7   | FMT  | H     | 948  | -    | 0,2,2        | -    | -        | 0,1,1       | -    | -        |
| 7   | FMT  | H     | 19   | -    | 0,2,2        | -    | -        | 0,1,1       | -    | -        |
| 7   | FMT  | H     | 1004 | -    | 0,2,2        | -    | -        | 0,1,1       | -    | -        |
| 7   | FMT  | H     | 1062 | -    | 0,2,2        | -    | -        | 0,1,1       | -    | -        |
| 5   | HEM  | B     | 501  | 2    | 27,50,50     | 0.99 | 2 (7%)   | 17,82,82    | 2.56 | 8 (47%)  |
| 6   | DEB  | F     | 502  | -    | 27,27,27     | 0.59 | 1 (3%)   | 35,39,39    | 0.95 | 1 (2%)   |
| 5   | HEM  | A     | 501  | 1    | 27,50,50     | 1.21 | 3 (11%)  | 17,82,82    | 1.65 | 5 (29%)  |
| 5   | HEM  | D     | 501  | 1    | 27,50,50     | 1.47 | 2 (7%)   | 17,82,82    | 2.10 | 7 (41%)  |
| 7   | FMT  | H     | 970  | -    | 0,2,2        | -    | -        | 0,1,1       | -    | -        |



| Mol | Type | Chain | Res | Link | Bond lengths |      |          | Bond angles |      |          |
|-----|------|-------|-----|------|--------------|------|----------|-------------|------|----------|
|     |      |       |     |      | Counts       | RMSZ | # Z  > 2 | Counts      | RMSZ | # Z  > 2 |
| 7   | FMT  | H     | 908 | -    | 0,2,2        | -    | -        | 0,1,1       | -    | -        |
| 7   | FMT  | H     | 71  | -    | 0,2,2        | -    | -        | 0,1,1       | -    | -        |
| 7   | FMT  | H     | 950 | -    | 0,2,2        | -    | -        | 0,1,1       | -    | -        |
| 7   | FMT  | H     | 997 | -    | 0,2,2        | -    | -        | 0,1,1       | -    | -        |
| 7   | FMT  | H     | 940 | -    | 0,2,2        | -    | -        | 0,1,1       | -    | -        |
| 7   | FMT  | H     | 15  | -    | 0,2,2        | -    | -        | 0,1,1       | -    | -        |
| 7   | FMT  | H     | 932 | -    | 0,2,2        | -    | -        | 0,1,1       | -    | -        |
| 7   | FMT  | H     | 955 | -    | 0,2,2        | -    | -        | 0,1,1       | -    | -        |
| 7   | FMT  | H     | 942 | -    | 0,2,2        | -    | -        | 0,1,1       | -    | -        |
| 7   | FMT  | H     | 919 | -    | 0,2,2        | -    | -        | 0,1,1       | -    | -        |

In the following table, the Chirals column lists the number of chiral outliers, the number of chiral centers analysed, the number of these observed in the model and the number defined in the Chemical Component Dictionary. Similar counts are reported in the Torsion and Rings columns. '-' means no outliers of that kind were identified.

| Mol | Type | Chain | Res  | Link | Chirals | Torsions   | Rings   |
|-----|------|-------|------|------|---------|------------|---------|
| 6   | DEB  | E     | 502  | -    | -       | 9/50/50/50 | 0/1/1/1 |
| 9   | GOL  | K     | 8[B] | -    | -       | 2/4/4/4    | -       |
| 9   | GOL  | K     | 8[A] | -    | -       | 4/4/4/4    | -       |
| 9   | GOL  | K     | 1[B] | -    | -       | 1/4/4/4    | -       |
| 9   | GOL  | K     | 3    | -    | -       | 4/4/4/4    | -       |
| 9   | GOL  | K     | 11   | -    | -       | 3/4/4/4    | -       |
| 9   | GOL  | K     | 1[A] | -    | -       | 3/4/4/4    | -       |
| 9   | GOL  | K     | 5    | -    | -       | 2/4/4/4    | -       |
| 9   | GOL  | K     | 4[B] | -    | -       | 4/4/4/4    | -       |
| 5   | HEM  | C     | 501  | 3    | -       | 0/6/54/54  | -       |
| 6   | DEB  | D     | 502  | -    | -       | 8/50/50/50 | 0/1/1/1 |
| 9   | GOL  | K     | 4[A] | -    | -       | 2/4/4/4    | -       |
| 6   | DEB  | B     | 502  | -    | -       | 7/50/50/50 | 0/1/1/1 |
| 5   | HEM  | F     | 501  | 1    | -       | 0/6/54/54  | -       |
| 5   | HEM  | B     | 501  | 2    | -       | 0/6/54/54  | -       |
| 6   | DEB  | F     | 502  | -    | -       | 8/50/50/50 | 0/1/1/1 |
| 5   | HEM  | A     | 501  | 1    | -       | 0/6/54/54  | -       |
| 5   | HEM  | D     | 501  | 1    | -       | 0/6/54/54  | -       |
| 5   | HEM  | E     | 501  | 4    | -       | 0/6/54/54  | -       |
| 6   | DEB  | A     | 502  | -    | -       | 8/50/50/50 | 0/1/1/1 |
| 9   | GOL  | K     | 13   | -    | -       | 2/4/4/4    | -       |
| 9   | GOL  | K     | 7[B] | -    | -       | 1/4/4/4    | -       |

Continued on next page...

Continued from previous page...

| Mol | Type | Chain | Res  | Link | Chirals | Torsions    | Rings   |
|-----|------|-------|------|------|---------|-------------|---------|
| 9   | GOL  | K     | 9    | -    | -       | 2/4/4/4     | -       |
| 9   | GOL  | K     | 7[A] | -    | -       | 4/4/4/4     | -       |
| 6   | DEB  | Z     | 502  | -    | -       | 10/50/50/50 | 0/1/1/1 |

All (18) bond length outliers are listed below:

| Mol | Chain | Res | Type | Atoms   | Z     | Observed(Å) | Ideal(Å) |
|-----|-------|-----|------|---------|-------|-------------|----------|
| 5   | D     | 501 | HEM  | C3B-C2B | -4.22 | 1.34        | 1.40     |
| 5   | E     | 501 | HEM  | C3B-C2B | -3.78 | 1.35        | 1.40     |
| 5   | E     | 501 | HEM  | C3D-C4D | 3.55  | 1.50        | 1.42     |
| 5   | E     | 501 | HEM  | CAA-C2A | 2.78  | 1.56        | 1.52     |
| 5   | D     | 501 | HEM  | C1D-ND  | -2.74 | 1.30        | 1.36     |
| 5   | E     | 501 | HEM  | C1A-NA  | 2.74  | 1.41        | 1.36     |
| 5   | B     | 501 | HEM  | C3D-C2D | -2.67 | 1.29        | 1.37     |
| 5   | C     | 501 | HEM  | C3D-C4D | 2.63  | 1.48        | 1.42     |
| 5   | A     | 501 | HEM  | C3B-C2B | -2.49 | 1.36        | 1.40     |
| 6   | F     | 502 | DEB  | O24-C9  | 2.40  | 1.25        | 1.21     |
| 5   | A     | 501 | HEM  | C3D-C4D | 2.38  | 1.47        | 1.42     |
| 5   | C     | 501 | HEM  | C3D-C2D | -2.29 | 1.30        | 1.37     |
| 5   | A     | 501 | HEM  | CMC-C2C | 2.23  | 1.56        | 1.51     |
| 5   | E     | 501 | HEM  | C3C-C2C | -2.22 | 1.37        | 1.40     |
| 5   | C     | 501 | HEM  | CAA-C2A | 2.21  | 1.55        | 1.52     |
| 5   | C     | 501 | HEM  | C4A-NA  | 2.15  | 1.40        | 1.36     |
| 5   | B     | 501 | HEM  | C1D-ND  | -2.09 | 1.31        | 1.36     |
| 5   | F     | 501 | HEM  | C3D-C4D | 2.02  | 1.47        | 1.42     |

All (41) bond angle outliers are listed below:

| Mol | Chain | Res | Type | Atoms       | Z     | Observed(°) | Ideal(°) |
|-----|-------|-----|------|-------------|-------|-------------|----------|
| 5   | B     | 501 | HEM  | CMA-C3A-C4A | -5.43 | 120.12      | 128.46   |
| 5   | E     | 501 | HEM  | C4A-C3A-C2A | 5.11  | 110.55      | 107.00   |
| 5   | B     | 501 | HEM  | CAD-CBD-CGD | 4.30  | 119.89      | 112.67   |
| 5   | B     | 501 | HEM  | CMC-C2C-C3C | 4.05  | 132.25      | 124.68   |
| 5   | C     | 501 | HEM  | C4A-C3A-C2A | 3.88  | 109.69      | 107.00   |
| 5   | D     | 501 | HEM  | CMC-C2C-C3C | 3.83  | 131.85      | 124.68   |
| 5   | E     | 501 | HEM  | C2C-C3C-C4C | 3.69  | 109.47      | 106.90   |
| 5   | A     | 501 | HEM  | C2C-C3C-C4C | 3.59  | 109.41      | 106.90   |
| 5   | B     | 501 | HEM  | CMA-C3A-C2A | 3.45  | 131.45      | 124.94   |
| 5   | E     | 501 | HEM  | C1D-C2D-C3D | -3.33 | 104.68      | 107.00   |
| 5   | D     | 501 | HEM  | CMD-C2D-C3D | -3.32 | 118.68      | 124.94   |
| 5   | D     | 501 | HEM  | CAD-CBD-CGD | 3.28  | 118.17      | 112.67   |

Continued on next page...

Continued from previous page...

| Mol | Chain | Res | Type | Atoms       | Z     | Observed(°) | Ideal(°) |
|-----|-------|-----|------|-------------|-------|-------------|----------|
| 5   | F     | 501 | HEM  | CBD-CAD-C3D | -3.22 | 106.55      | 112.48   |
| 5   | F     | 501 | HEM  | CMC-C2C-C3C | 3.14  | 130.56      | 124.68   |
| 5   | E     | 501 | HEM  | CBD-CAD-C3D | -3.03 | 106.89      | 112.48   |
| 5   | E     | 501 | HEM  | CBA-CAA-C2A | 3.00  | 118.01      | 112.49   |
| 6   | F     | 502 | DEB  | C10-C11-C12 | 2.86  | 120.30      | 114.41   |
| 5   | D     | 501 | HEM  | C1D-C2D-C3D | 2.84  | 108.97      | 107.00   |
| 5   | C     | 501 | HEM  | C2C-C3C-C4C | 2.81  | 108.86      | 106.90   |
| 5   | B     | 501 | HEM  | CMD-C2D-C1D | 2.77  | 132.72      | 128.46   |
| 5   | D     | 501 | HEM  | CBA-CAA-C2A | 2.73  | 117.53      | 112.49   |
| 5   | A     | 501 | HEM  | C4A-C3A-C2A | 2.73  | 108.89      | 107.00   |
| 5   | B     | 501 | HEM  | CBA-CAA-C2A | 2.71  | 117.48      | 112.49   |
| 5   | D     | 501 | HEM  | C4A-C3A-C2A | 2.59  | 108.80      | 107.00   |
| 5   | C     | 501 | HEM  | CMA-C3A-C4A | -2.45 | 124.69      | 128.46   |
| 5   | A     | 501 | HEM  | CAD-CBD-CGD | 2.43  | 116.75      | 112.67   |
| 5   | C     | 501 | HEM  | CMC-C2C-C3C | 2.39  | 129.15      | 124.68   |
| 5   | E     | 501 | HEM  | C3B-C4B-NB  | -2.36 | 106.16      | 109.21   |
| 5   | B     | 501 | HEM  | CMD-C2D-C3D | -2.35 | 120.50      | 124.94   |
| 5   | B     | 501 | HEM  | CBD-CAD-C3D | -2.33 | 108.18      | 112.48   |
| 5   | A     | 501 | HEM  | C3C-C4C-NC  | -2.32 | 106.56      | 110.94   |
| 5   | E     | 501 | HEM  | CMD-C2D-C3D | 2.29  | 129.26      | 124.94   |
| 6   | B     | 502 | DEB  | O21-C5-C6   | -2.27 | 105.56      | 109.83   |
| 5   | A     | 501 | HEM  | CMC-C2C-C3C | 2.24  | 128.87      | 124.68   |
| 5   | C     | 501 | HEM  | CBD-CAD-C3D | -2.22 | 108.38      | 112.48   |
| 5   | F     | 501 | HEM  | C2C-C3C-C4C | 2.13  | 108.39      | 106.90   |
| 5   | D     | 501 | HEM  | CMD-C2D-C1D | 2.12  | 131.72      | 128.46   |
| 6   | Z     | 502 | DEB  | C10-C11-C12 | 2.11  | 118.77      | 114.41   |
| 5   | F     | 501 | HEM  | CAD-CBD-CGD | 2.11  | 116.20      | 112.67   |
| 5   | C     | 501 | HEM  | CBA-CAA-C2A | 2.10  | 116.36      | 112.49   |
| 6   | B     | 502 | DEB  | O26-C11-C10 | 2.10  | 113.70      | 108.82   |

There are no chirality outliers.

All (84) torsion outliers are listed below:

| Mol | Chain | Res  | Type | Atoms           |
|-----|-------|------|------|-----------------|
| 6   | Z     | 502  | DEB  | C3-C4-C5-O21    |
| 6   | Z     | 502  | DEB  | C20-C4-C5-O21   |
| 6   | Z     | 502  | DEB  | O16-C13-C14-C15 |
| 9   | K     | 1[A] | GOL  | O1-C1-C2-C3     |
| 9   | K     | 4[B] | GOL  | O1-C1-C2-C3     |
| 9   | K     | 4[B] | GOL  | C1-C2-C3-O3     |
| 9   | K     | 5    | GOL  | C1-C2-C3-O3     |
| 9   | K     | 5    | GOL  | O2-C2-C3-O3     |

Continued on next page...

Continued from previous page...

| Mol | Chain | Res  | Type | Atoms         |
|-----|-------|------|------|---------------|
| 9   | K     | 8[A] | GOL  | O1-C1-C2-C3   |
| 9   | K     | 8[A] | GOL  | C1-C2-C3-O3   |
| 9   | K     | 8[B] | GOL  | O1-C1-C2-C3   |
| 9   | K     | 11   | GOL  | C1-C2-C3-O3   |
| 9   | K     | 13   | GOL  | O1-C1-C2-C3   |
| 6   | A     | 502  | DEB  | C3-C4-C5-O21  |
| 6   | D     | 502  | DEB  | C3-C4-C5-O21  |
| 6   | Z     | 502  | DEB  | C20-C4-C5-C6  |
| 6   | Z     | 502  | DEB  | C3-C4-C5-C6   |
| 9   | K     | 1[A] | GOL  | O1-C1-C2-O2   |
| 9   | K     | 4[A] | GOL  | O1-C1-C2-O2   |
| 9   | K     | 4[B] | GOL  | O2-C2-C3-O3   |
| 9   | K     | 8[B] | GOL  | O1-C1-C2-O2   |
| 6   | A     | 502  | DEB  | C20-C4-C5-O21 |
| 6   | D     | 502  | DEB  | C20-C4-C5-O21 |
| 9   | K     | 1[A] | GOL  | C1-C2-C3-O3   |
| 9   | K     | 3    | GOL  | O1-C1-C2-C3   |
| 9   | K     | 3    | GOL  | C1-C2-C3-O3   |
| 9   | K     | 4[A] | GOL  | O1-C1-C2-C3   |
| 9   | K     | 7[A] | GOL  | O1-C1-C2-C3   |
| 9   | K     | 7[A] | GOL  | C1-C2-C3-O3   |
| 9   | K     | 9    | GOL  | O1-C1-C2-C3   |
| 9   | K     | 4[B] | GOL  | O1-C1-C2-O2   |
| 6   | E     | 502  | DEB  | C18-C2-C3-O19 |
| 6   | F     | 502  | DEB  | C18-C2-C3-O19 |
| 6   | A     | 502  | DEB  | C18-C2-C3-C4  |
| 6   | B     | 502  | DEB  | C18-C2-C3-C4  |
| 6   | D     | 502  | DEB  | C18-C2-C3-C4  |
| 6   | E     | 502  | DEB  | C18-C2-C3-C4  |
| 6   | F     | 502  | DEB  | C18-C2-C3-C4  |
| 6   | Z     | 502  | DEB  | C18-C2-C3-C4  |
| 9   | K     | 3    | GOL  | O2-C2-C3-O3   |
| 9   | K     | 8[A] | GOL  | O1-C1-C2-O2   |
| 6   | E     | 502  | DEB  | C3-C4-C5-O21  |
| 6   | A     | 502  | DEB  | C18-C2-C3-O19 |
| 6   | B     | 502  | DEB  | C18-C2-C3-O19 |
| 6   | D     | 502  | DEB  | C18-C2-C3-O19 |
| 6   | Z     | 502  | DEB  | C18-C2-C3-O19 |
| 9   | K     | 1[B] | GOL  | O1-C1-C2-O2   |
| 9   | K     | 7[A] | GOL  | O2-C2-C3-O3   |
| 9   | K     | 9    | GOL  | O1-C1-C2-O2   |
| 9   | K     | 13   | GOL  | O1-C1-C2-O2   |

Continued on next page...

*Continued from previous page...*

| Mol | Chain | Res  | Type | Atoms           |
|-----|-------|------|------|-----------------|
| 9   | K     | 3    | GOL  | O1-C1-C2-O2     |
| 9   | K     | 7[A] | GOL  | O1-C1-C2-O2     |
| 6   | F     | 502  | DEB  | C3-C4-C5-O21    |
| 6   | D     | 502  | DEB  | C3-C4-C5-C6     |
| 6   | Z     | 502  | DEB  | C12-C13-C14-C15 |
| 6   | E     | 502  | DEB  | C23-C8-C9-O24   |
| 6   | B     | 502  | DEB  | C3-C4-C5-O21    |
| 6   | A     | 502  | DEB  | C1-C2-C3-C4     |
| 6   | A     | 502  | DEB  | C1-C2-C3-O19    |
| 6   | B     | 502  | DEB  | C1-C2-C3-C4     |
| 6   | B     | 502  | DEB  | C1-C2-C3-O19    |
| 6   | D     | 502  | DEB  | C1-C2-C3-C4     |
| 6   | D     | 502  | DEB  | C1-C2-C3-O19    |
| 6   | E     | 502  | DEB  | C1-C2-C3-C4     |
| 6   | E     | 502  | DEB  | C1-C2-C3-O19    |
| 6   | F     | 502  | DEB  | C1-C2-C3-C4     |
| 6   | F     | 502  | DEB  | C1-C2-C3-O19    |
| 6   | Z     | 502  | DEB  | C1-C2-C3-C4     |
| 6   | Z     | 502  | DEB  | C1-C2-C3-O19    |
| 9   | K     | 11   | GOL  | O2-C2-C3-O3     |
| 6   | D     | 502  | DEB  | C20-C4-C5-C6    |
| 6   | E     | 502  | DEB  | C20-C4-C5-O21   |
| 6   | A     | 502  | DEB  | C3-C4-C5-C6     |
| 6   | A     | 502  | DEB  | C20-C4-C5-C6    |
| 6   | F     | 502  | DEB  | C2-C1-O16-C13   |
| 6   | E     | 502  | DEB  | C2-C1-O16-C13   |
| 9   | K     | 8[A] | GOL  | O2-C2-C3-O3     |
| 6   | B     | 502  | DEB  | O16-C13-C14-C15 |
| 9   | K     | 7[B] | GOL  | C1-C2-C3-O3     |
| 9   | K     | 11   | GOL  | O1-C1-C2-C3     |
| 6   | B     | 502  | DEB  | C3-C4-C5-C6     |
| 6   | F     | 502  | DEB  | C23-C8-C9-O24   |
| 6   | E     | 502  | DEB  | C7-C8-C9-O24    |
| 6   | F     | 502  | DEB  | C7-C8-C9-O24    |

There are no ring outliers.

47 monomers are involved in 104 short contacts:

| Mol | Chain | Res  | Type | Clashes | Symm-Clashes |
|-----|-------|------|------|---------|--------------|
| 7   | H     | 31   | FMT  | 2       | 0            |
| 7   | H     | 1018 | FMT  | 1       | 0            |
| 7   | H     | 906  | FMT  | 1       | 0            |

*Continued on next page...*

*Continued from previous page...*

| Mol | Chain | Res  | Type | Clashes | Symm-Clashes |
|-----|-------|------|------|---------|--------------|
| 7   | H     | 915  | FMT  | 1       | 0            |
| 5   | F     | 501  | HEM  | 3       | 0            |
| 7   | H     | 1061 | FMT  | 2       | 0            |
| 5   | E     | 501  | HEM  | 2       | 0            |
| 6   | A     | 502  | DEB  | 8       | 0            |
| 9   | K     | 13   | GOL  | 3       | 0            |
| 9   | K     | 7[B] | GOL  | 4       | 0            |
| 7   | H     | 1008 | FMT  | 1       | 0            |
| 9   | K     | 8[B] | GOL  | 3       | 0            |
| 7   | H     | 960  | FMT  | 2       | 0            |
| 7   | H     | 33   | FMT  | 2       | 0            |
| 7   | H     | 66   | FMT  | 3       | 0            |
| 9   | K     | 1[A] | GOL  | 1       | 0            |
| 7   | H     | 1053 | FMT  | 1       | 0            |
| 7   | H     | 938  | FMT  | 1       | 0            |
| 7   | H     | 1046 | FMT  | 1       | 0            |
| 7   | H     | 20   | FMT  | 1       | 0            |
| 9   | K     | 4[A] | GOL  | 7       | 0            |
| 9   | K     | 7[A] | GOL  | 9       | 0            |
| 7   | H     | 976  | FMT  | 1       | 0            |
| 7   | H     | 911  | FMT  | 1       | 0            |
| 7   | H     | 1009 | FMT  | 1       | 0            |
| 9   | K     | 3    | GOL  | 1       | 0            |
| 7   | H     | 928  | FMT  | 1       | 0            |
| 7   | H     | 951  | FMT  | 2       | 0            |
| 7   | H     | 902  | FMT  | 2       | 0            |
| 7   | H     | 1060 | FMT  | 3       | 0            |
| 6   | B     | 502  | DEB  | 2       | 0            |
| 7   | H     | 1040 | FMT  | 2       | 0            |
| 7   | H     | 943  | FMT  | 1       | 0            |
| 6   | Z     | 502  | DEB  | 6       | 0            |
| 9   | K     | 8[A] | GOL  | 1       | 0            |
| 9   | K     | 1[B] | GOL  | 2       | 0            |
| 7   | H     | 32   | FMT  | 0       | 1            |
| 7   | H     | 966  | FMT  | 1       | 0            |
| 7   | H     | 1024 | FMT  | 2       | 0            |
| 7   | H     | 19   | FMT  | 4       | 0            |
| 7   | H     | 1004 | FMT  | 1       | 0            |
| 5   | B     | 501  | HEM  | 1       | 0            |
| 5   | A     | 501  | HEM  | 3       | 0            |
| 5   | D     | 501  | HEM  | 4       | 0            |
| 7   | H     | 970  | FMT  | 2       | 0            |

*Continued on next page...*

*Continued from previous page...*

| Mol | Chain | Res | Type | Clashes | Symm-Clashes |
|-----|-------|-----|------|---------|--------------|
| 7   | H     | 71  | FMT  | 2       | 0            |
| 7   | H     | 950 | FMT  | 2       | 0            |

The following is a two-dimensional graphical depiction of Mogul quality analysis of bond lengths, bond angles, torsion angles, and ring geometry for all instances of the Ligand of Interest. In addition, ligands with molecular weight > 250 and outliers as shown on the validation Tables will also be included. For torsion angles, if less than 5% of the Mogul distribution of torsion angles is within 10 degrees of the torsion angle in question, then that torsion angle is considered an outlier. Any bond that is central to one or more torsion angles identified as an outlier by Mogul will be highlighted in the graph. For rings, the root-mean-square deviation (RMSD) between the ring in question and similar rings identified by Mogul is calculated over all ring torsion angles. If the average RMSD is greater than 60 degrees and the minimal RMSD between the ring in question and any Mogul-identified rings is also greater than 60 degrees, then that ring is considered an outlier. The outliers are highlighted in purple. The color gray indicates Mogul did not find sufficient equivalents in the CSD to analyse the geometry.



## Ligand DEB E 502

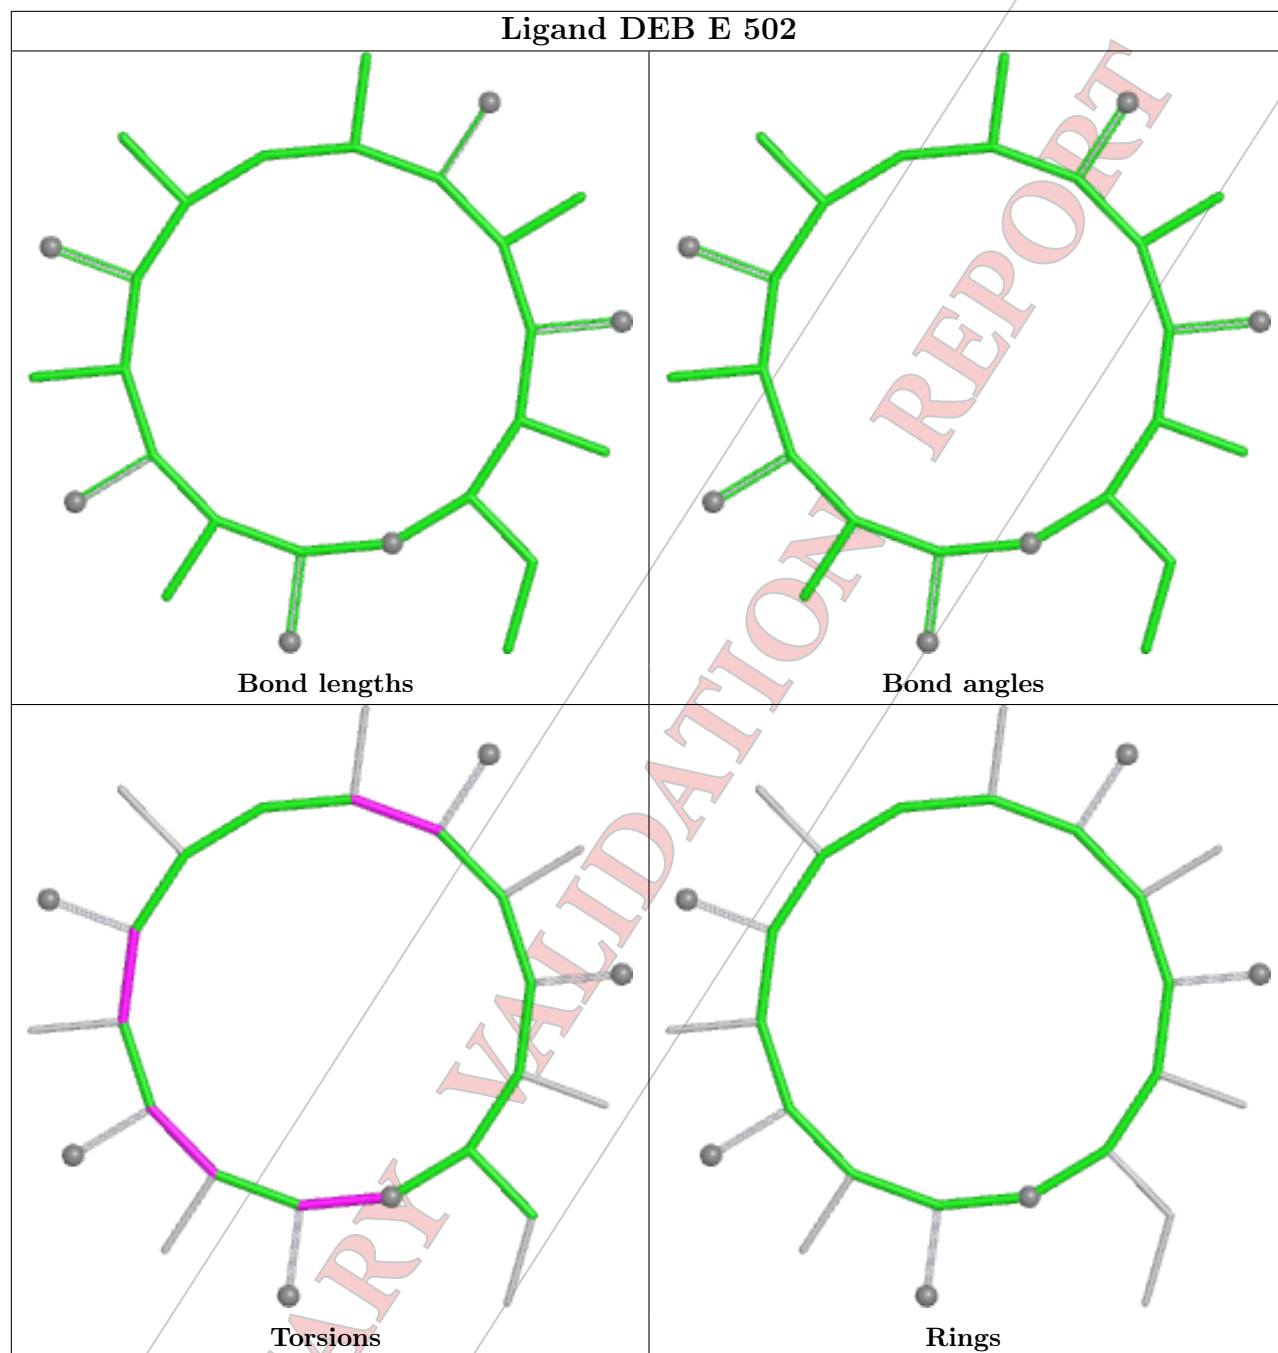

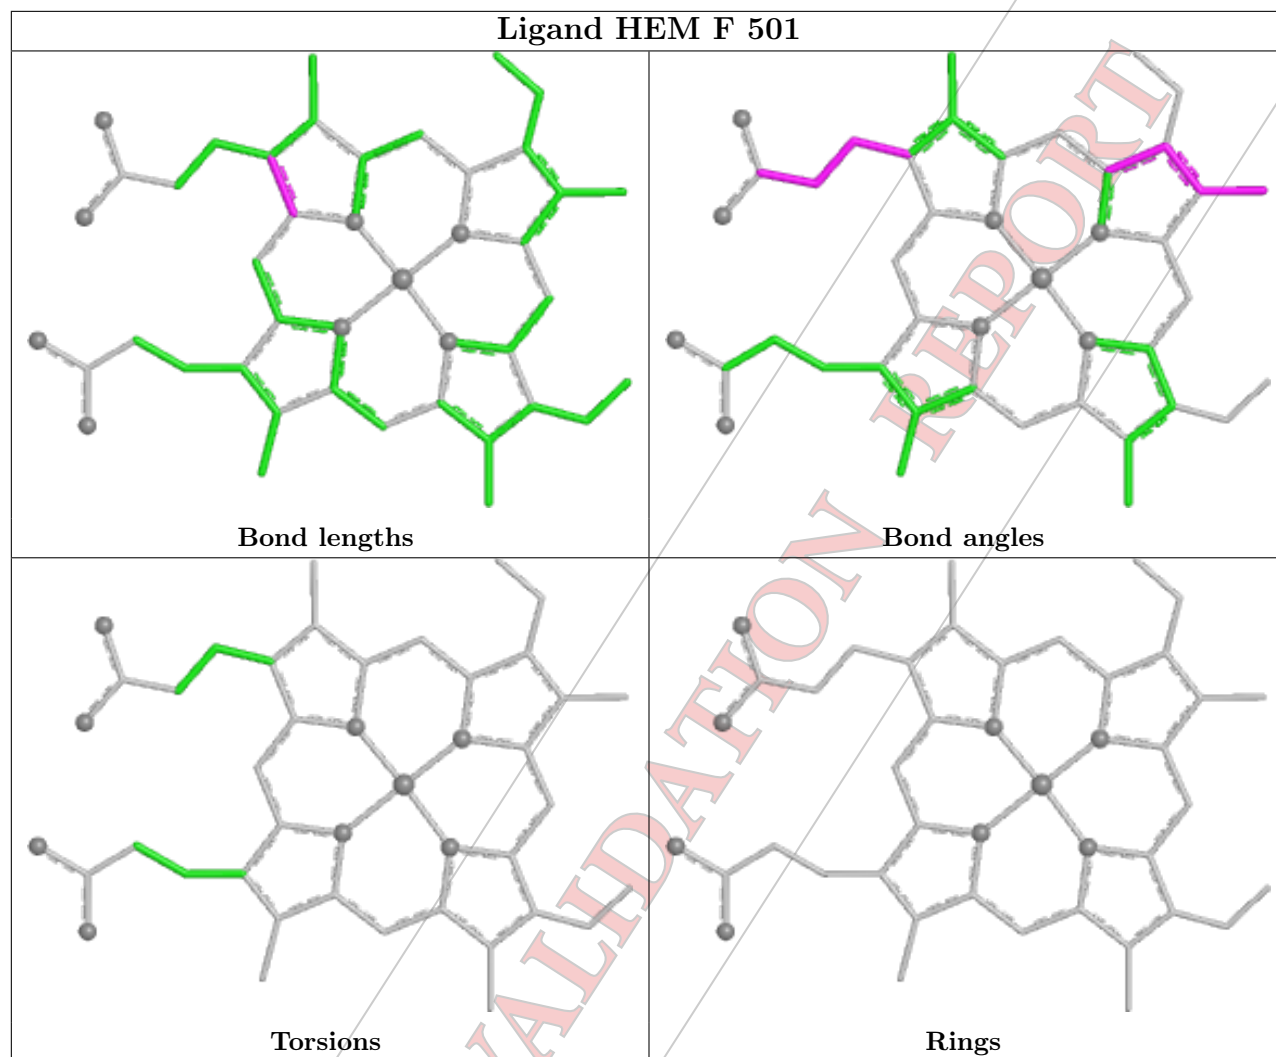

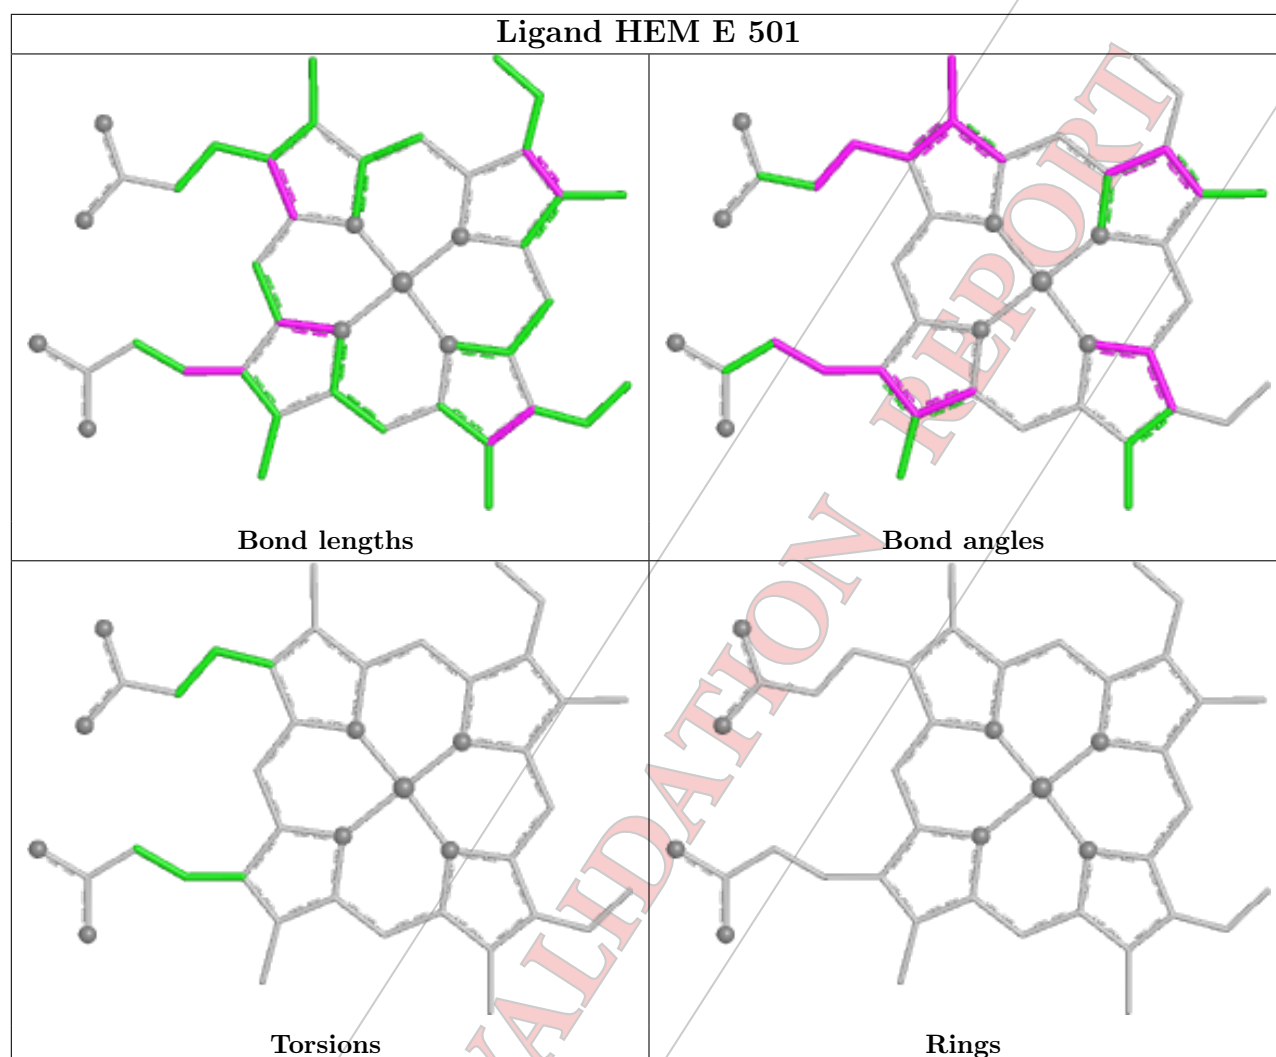

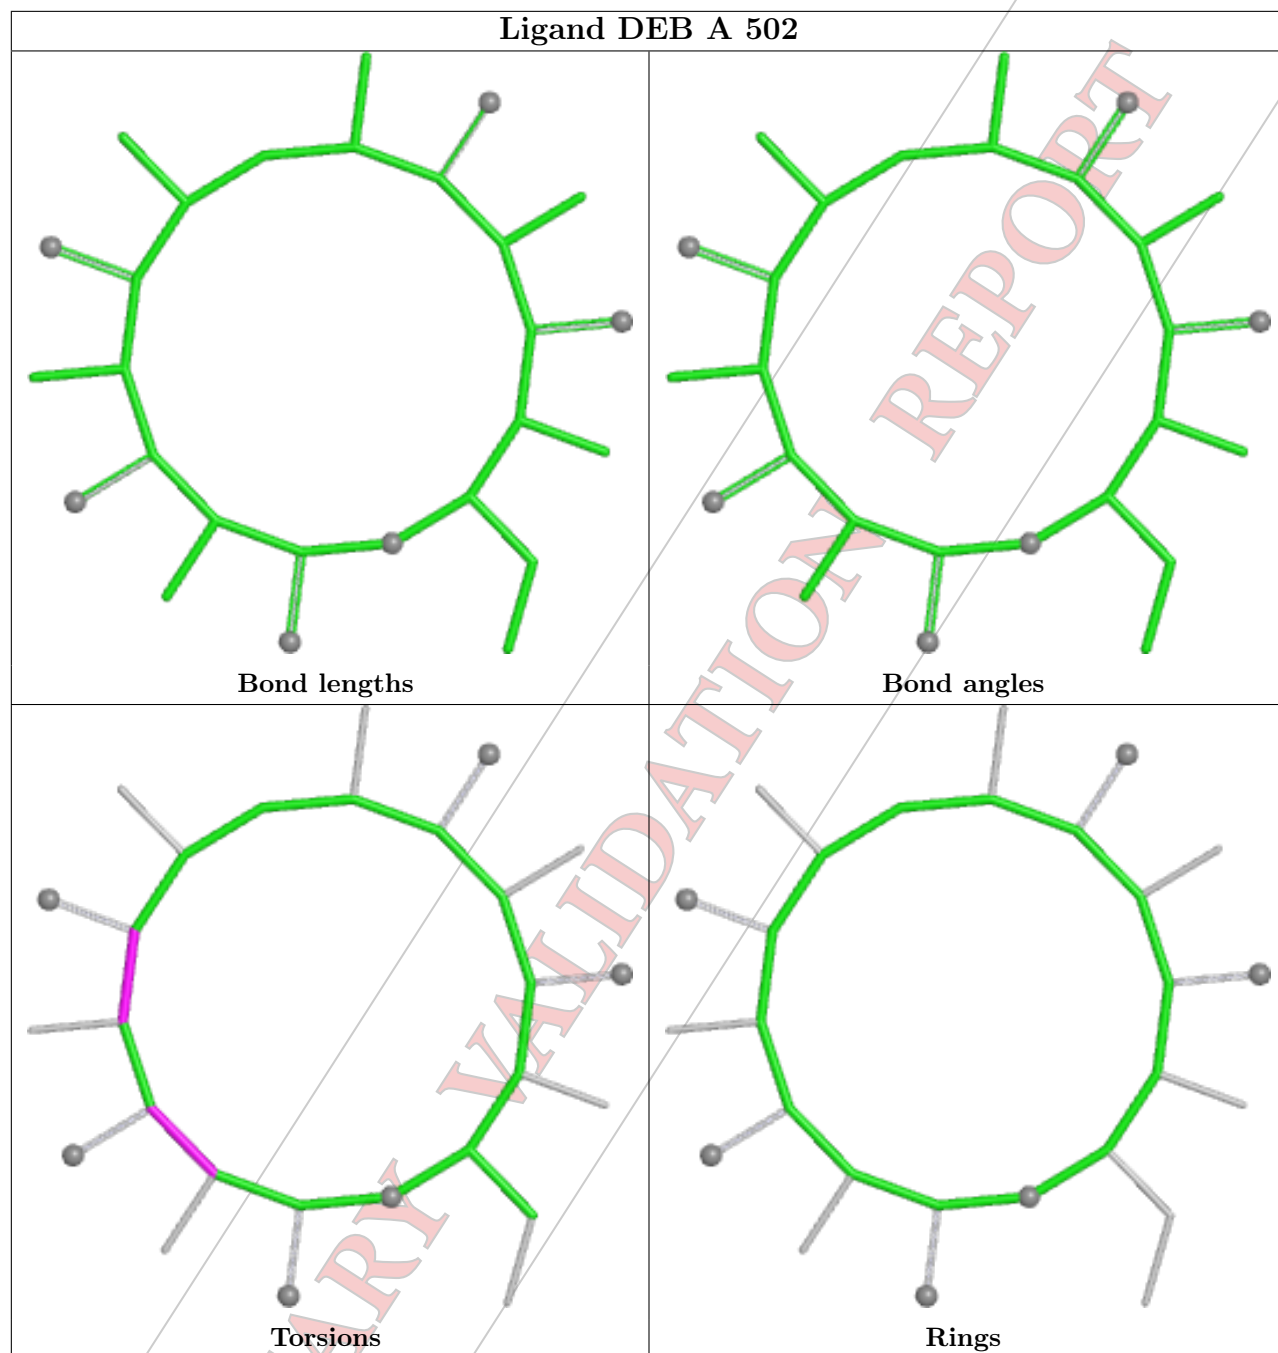

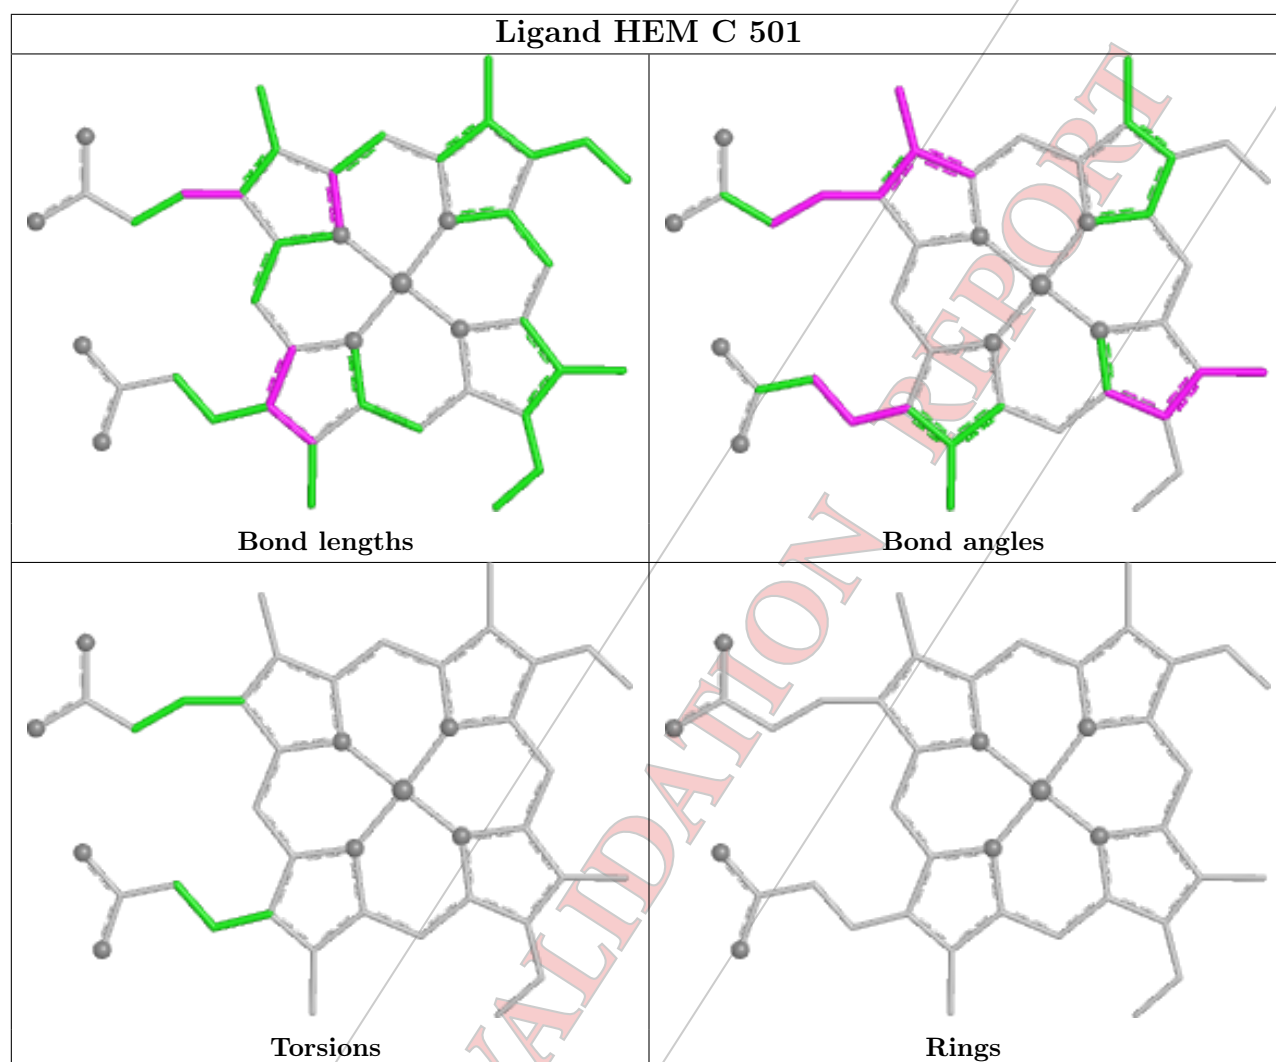

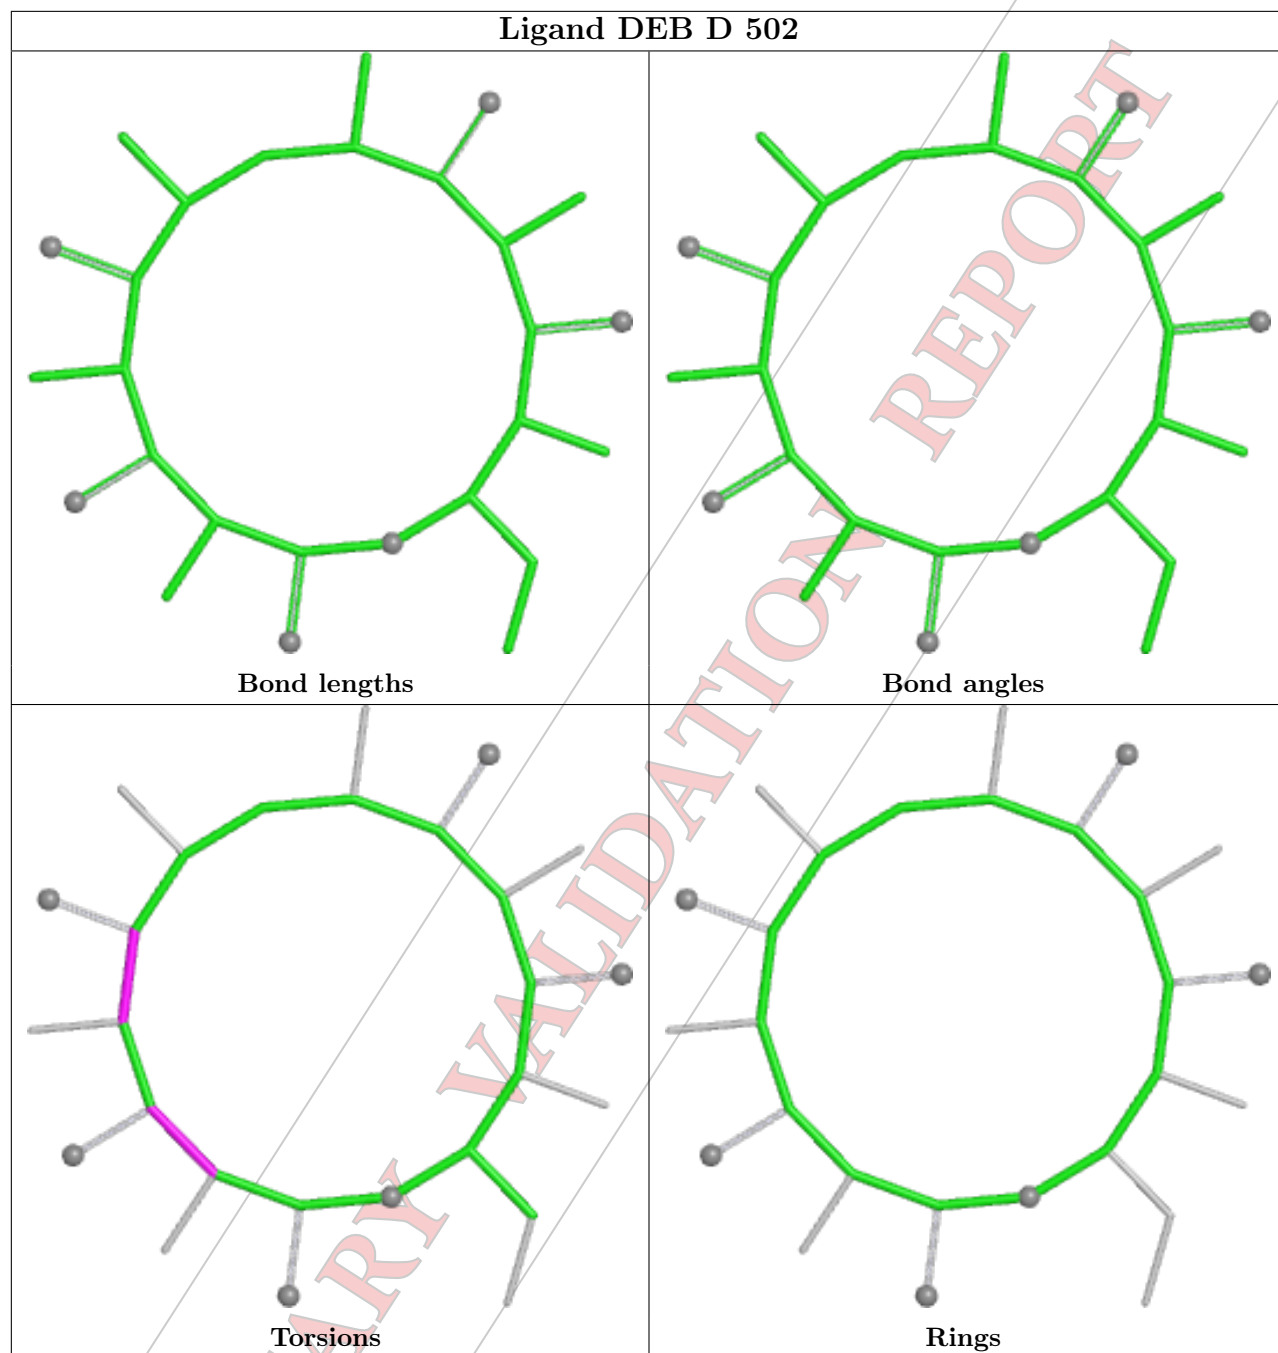

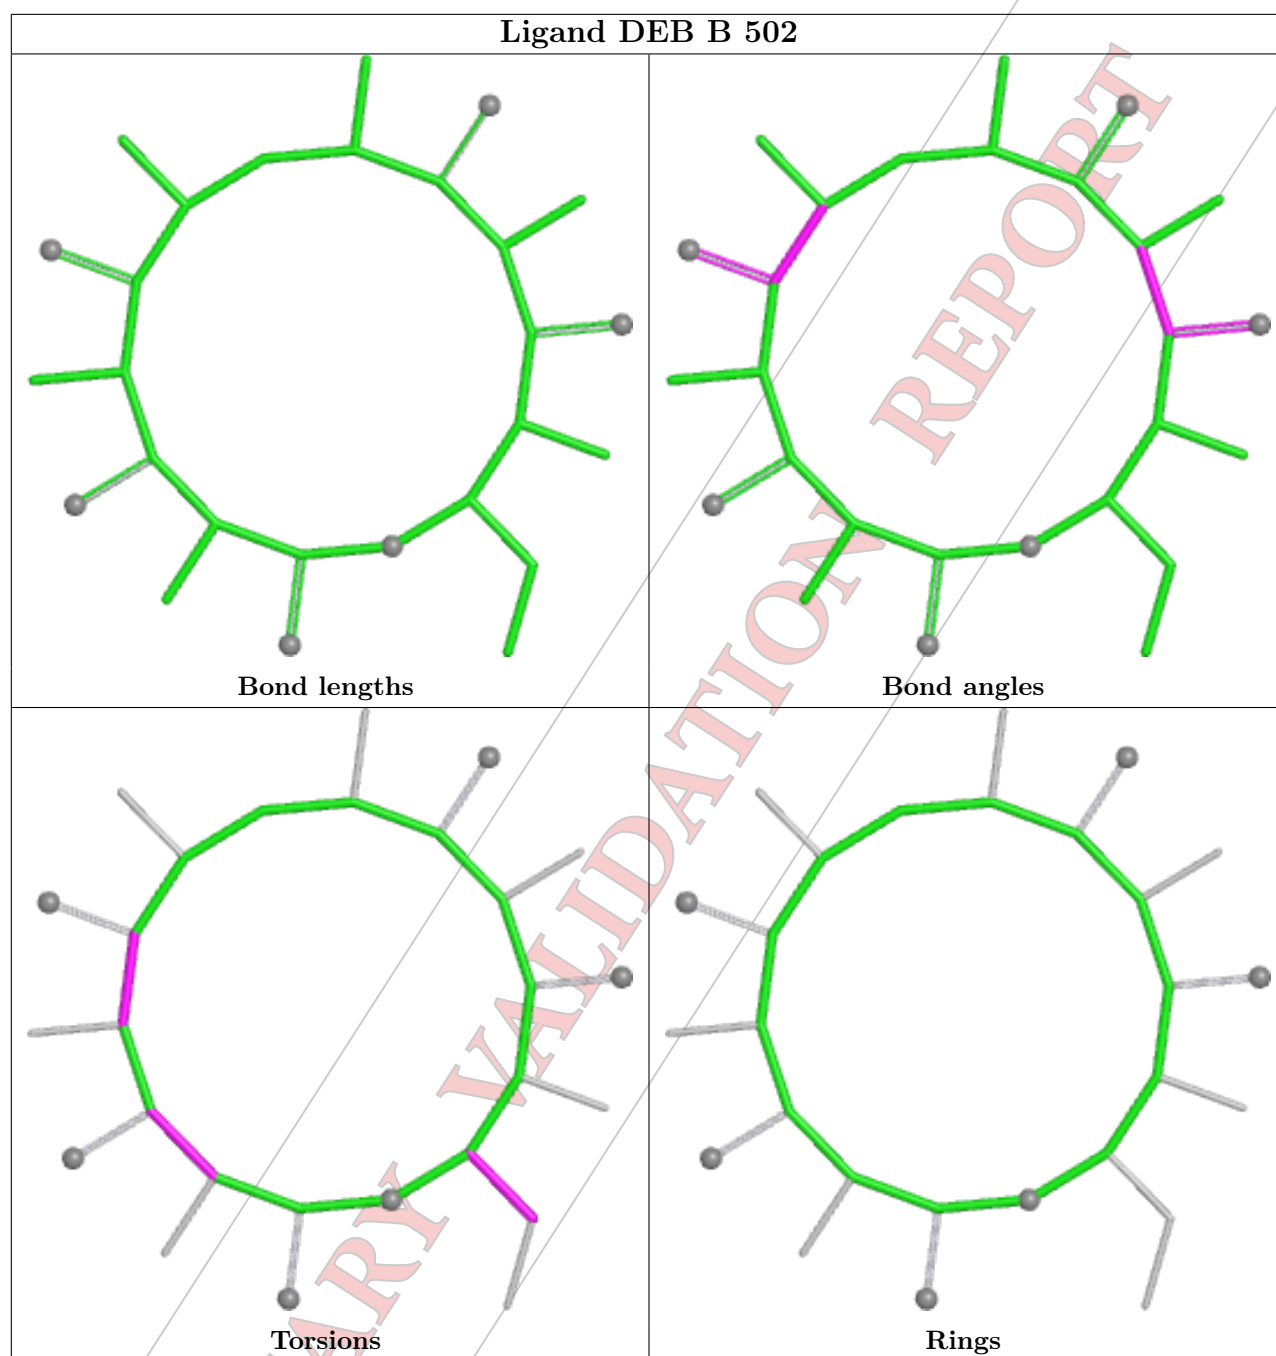



## Ligand DEB Z 502

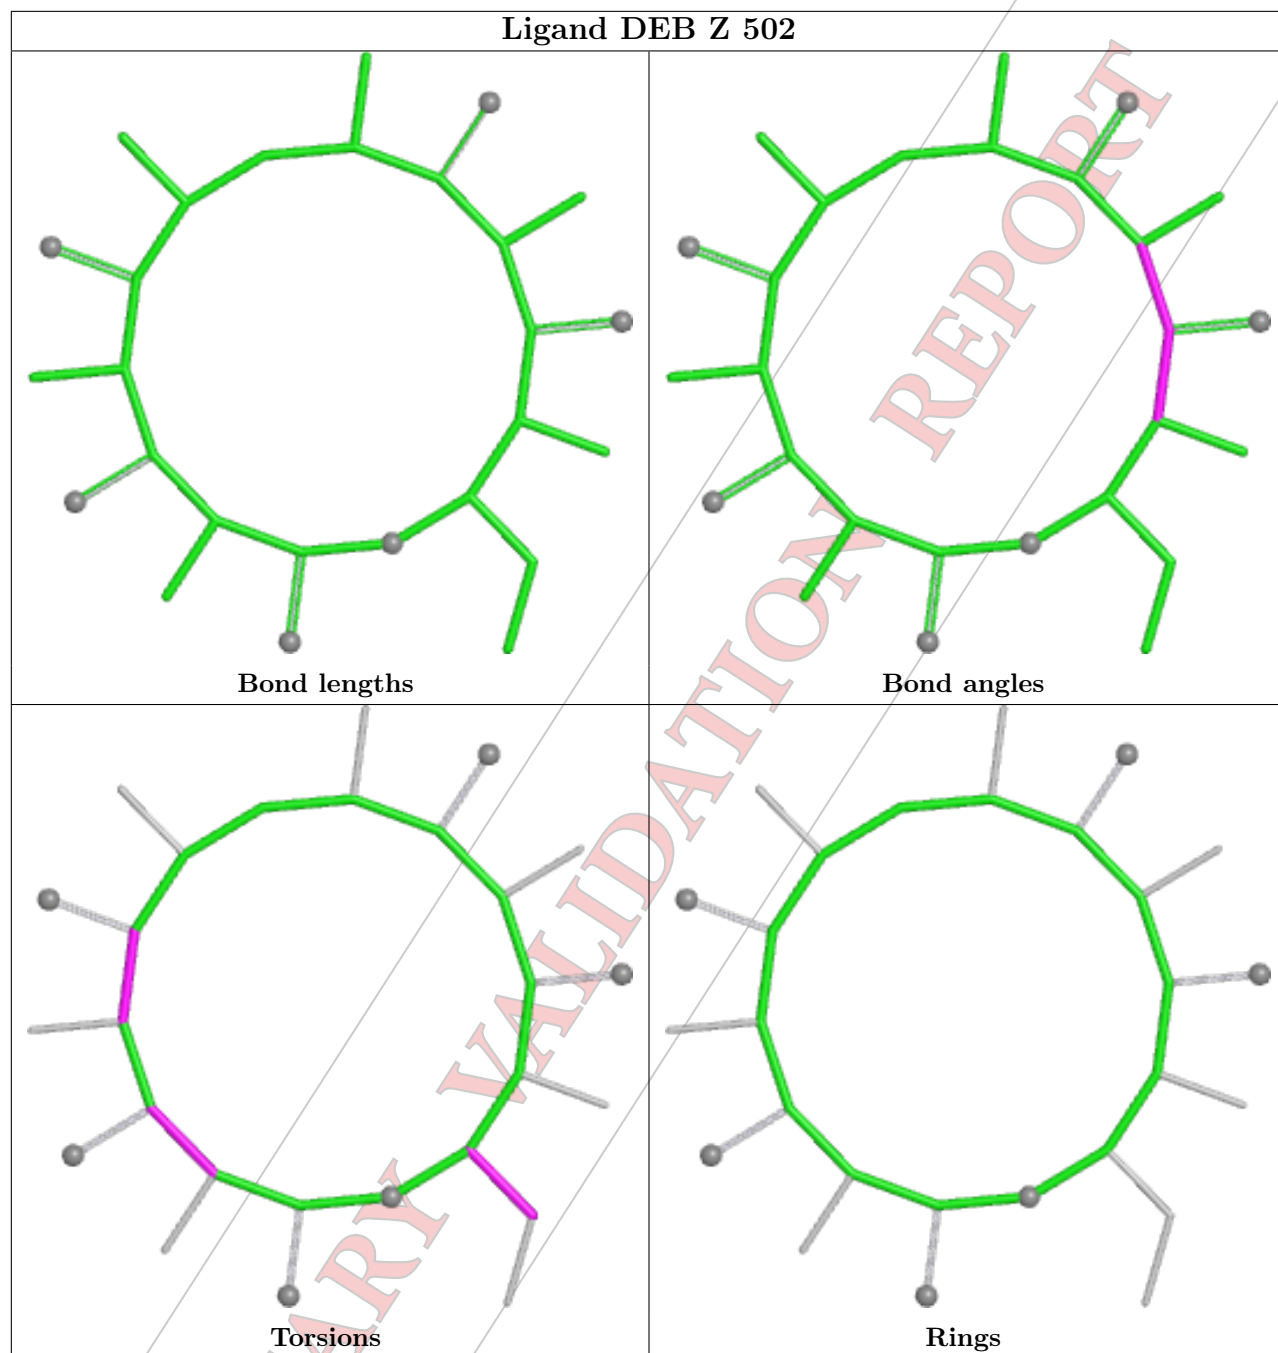

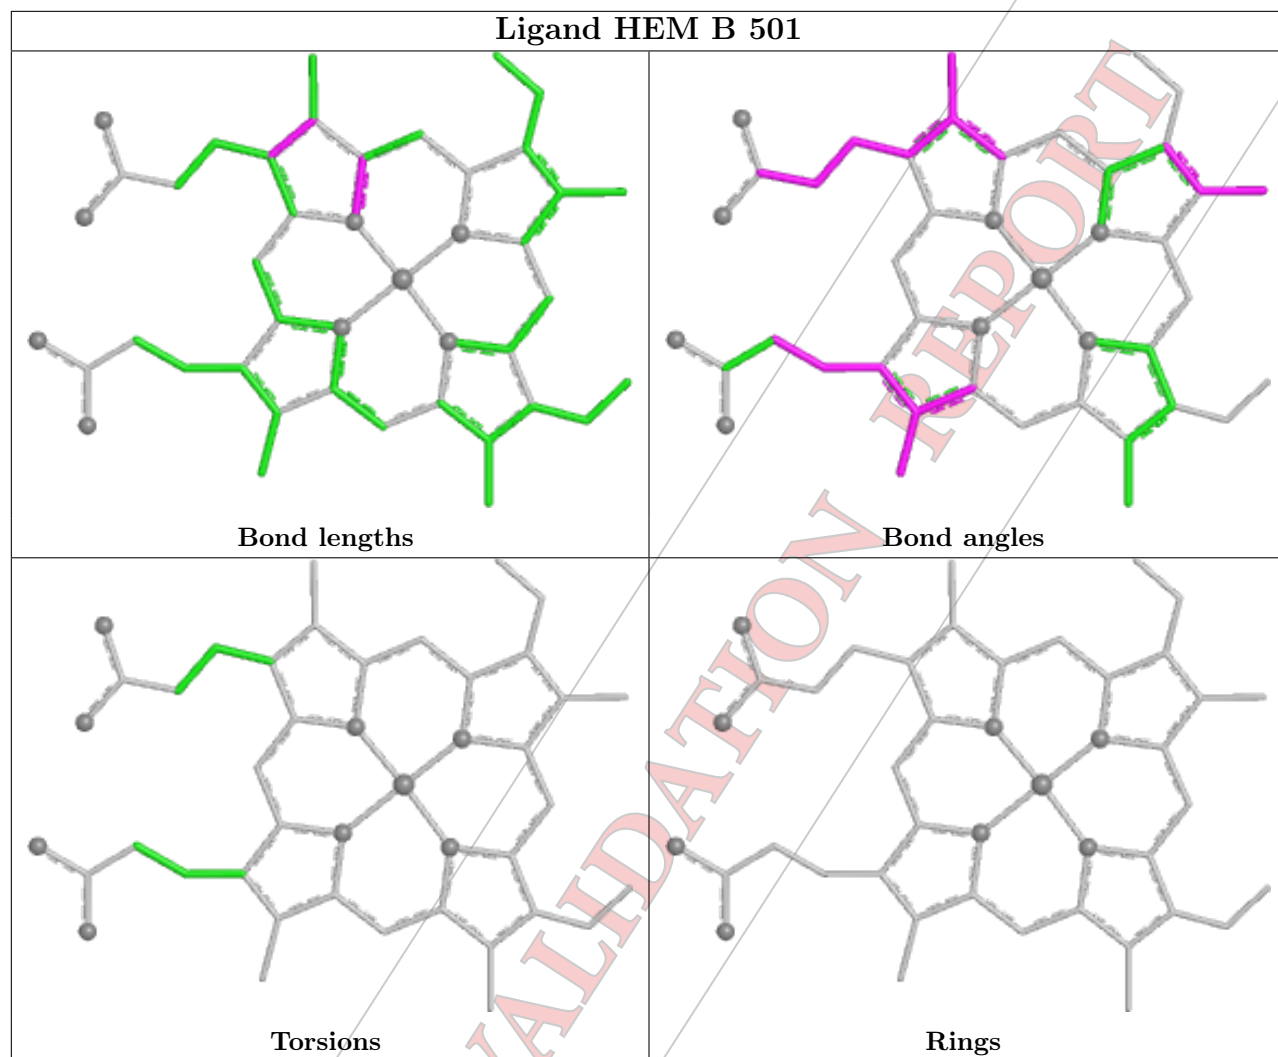

## Ligand DEB F 502

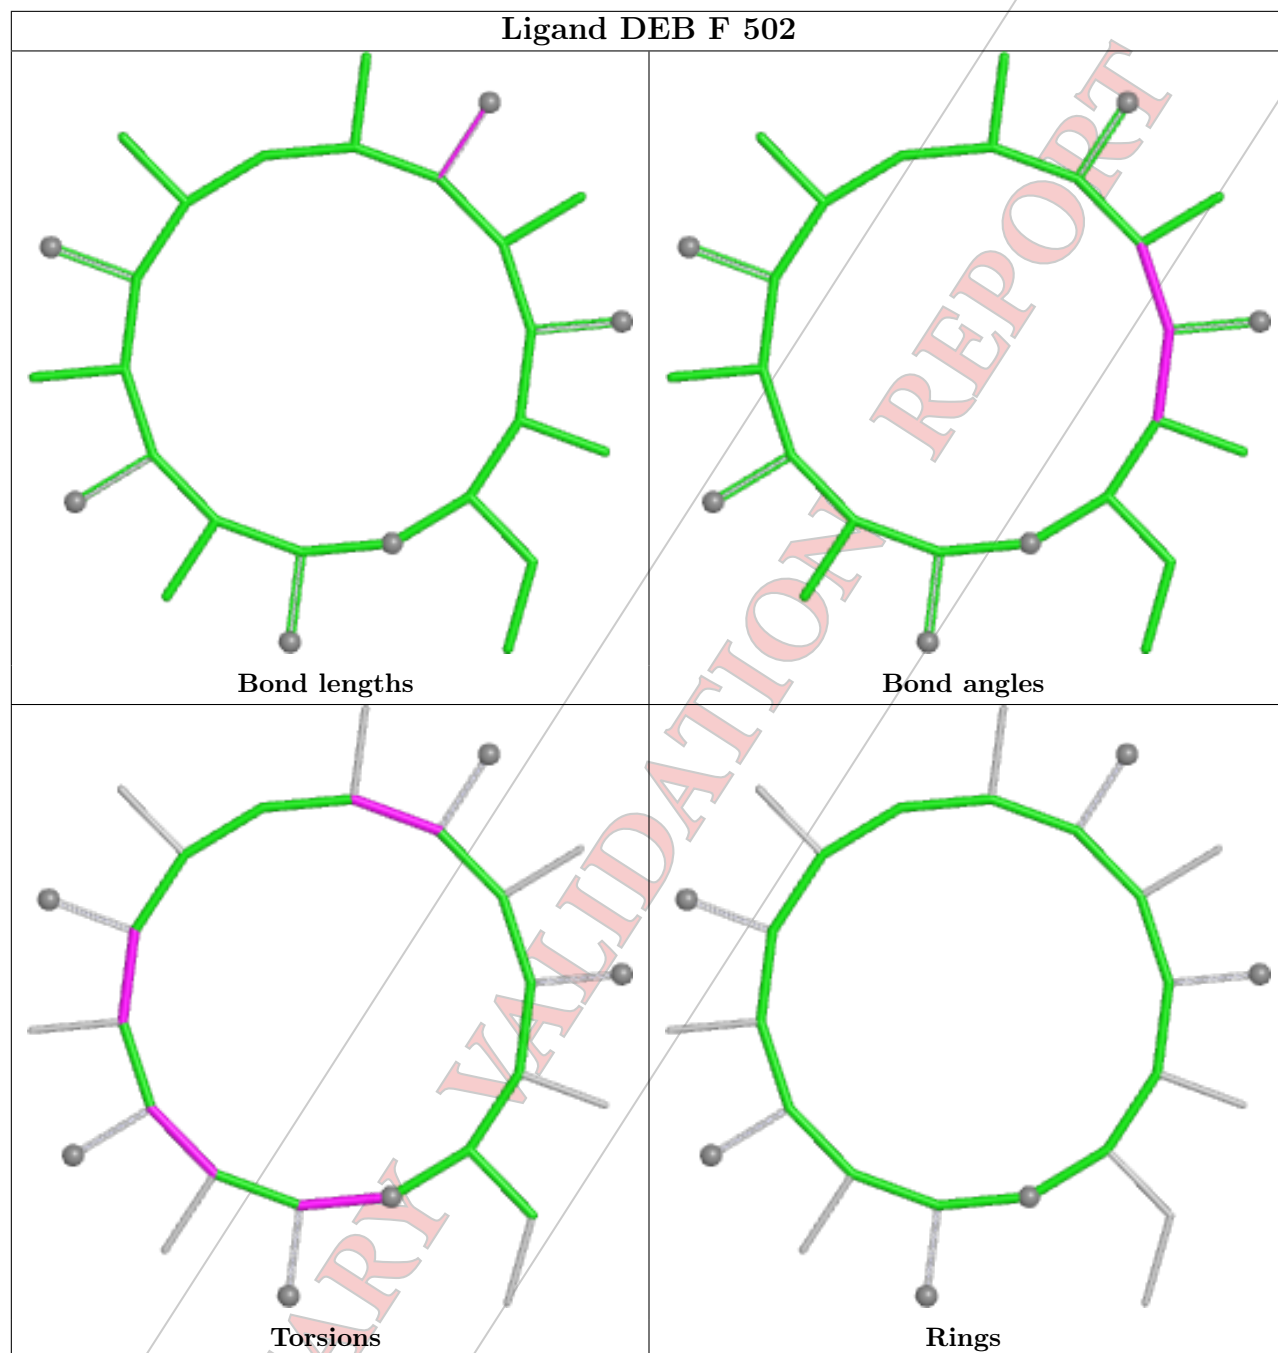

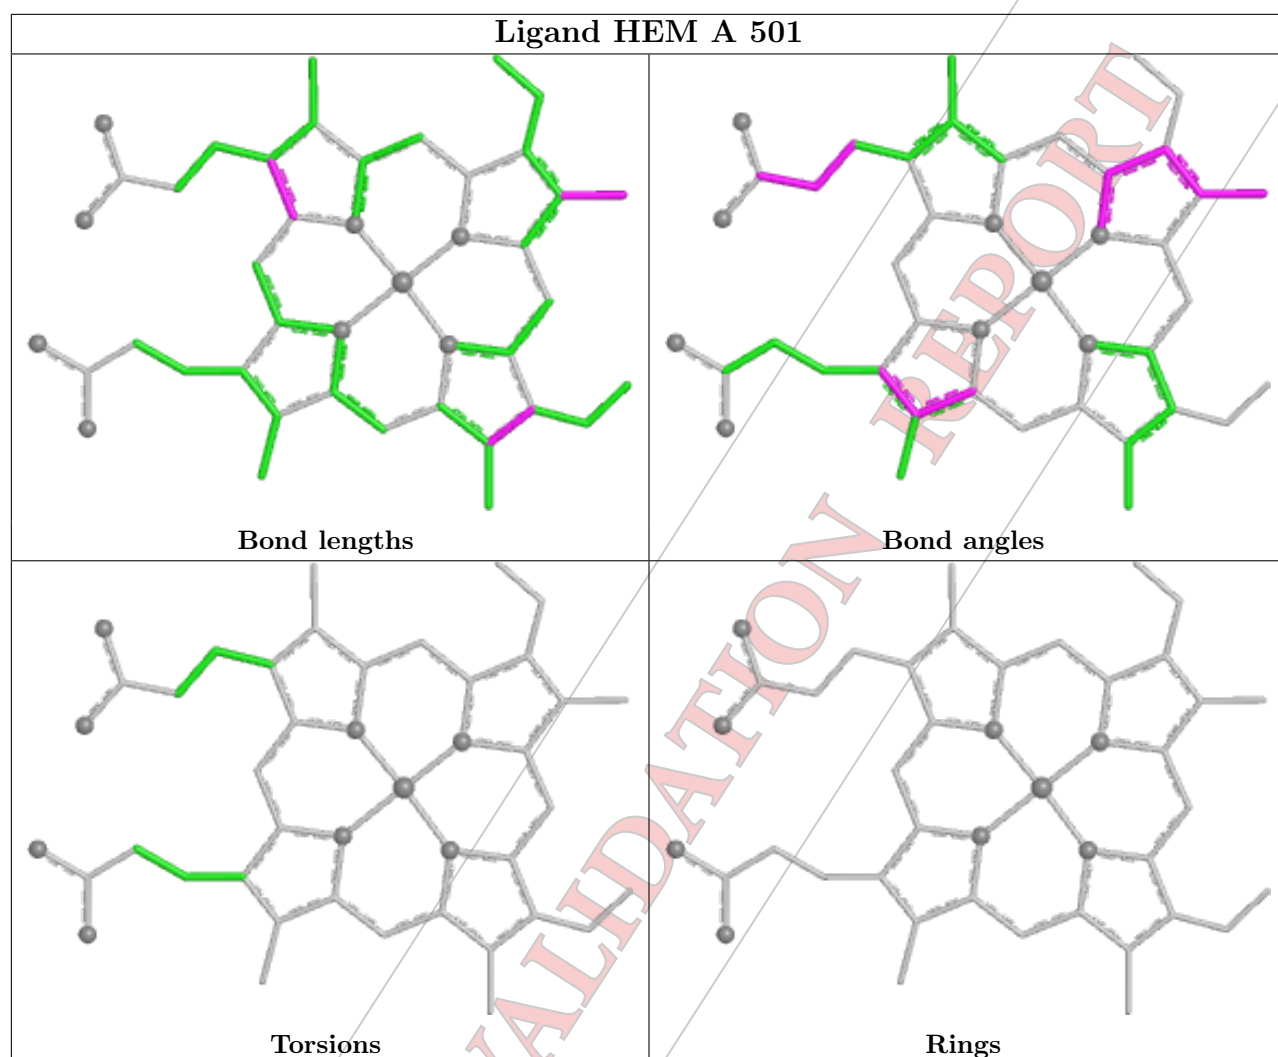

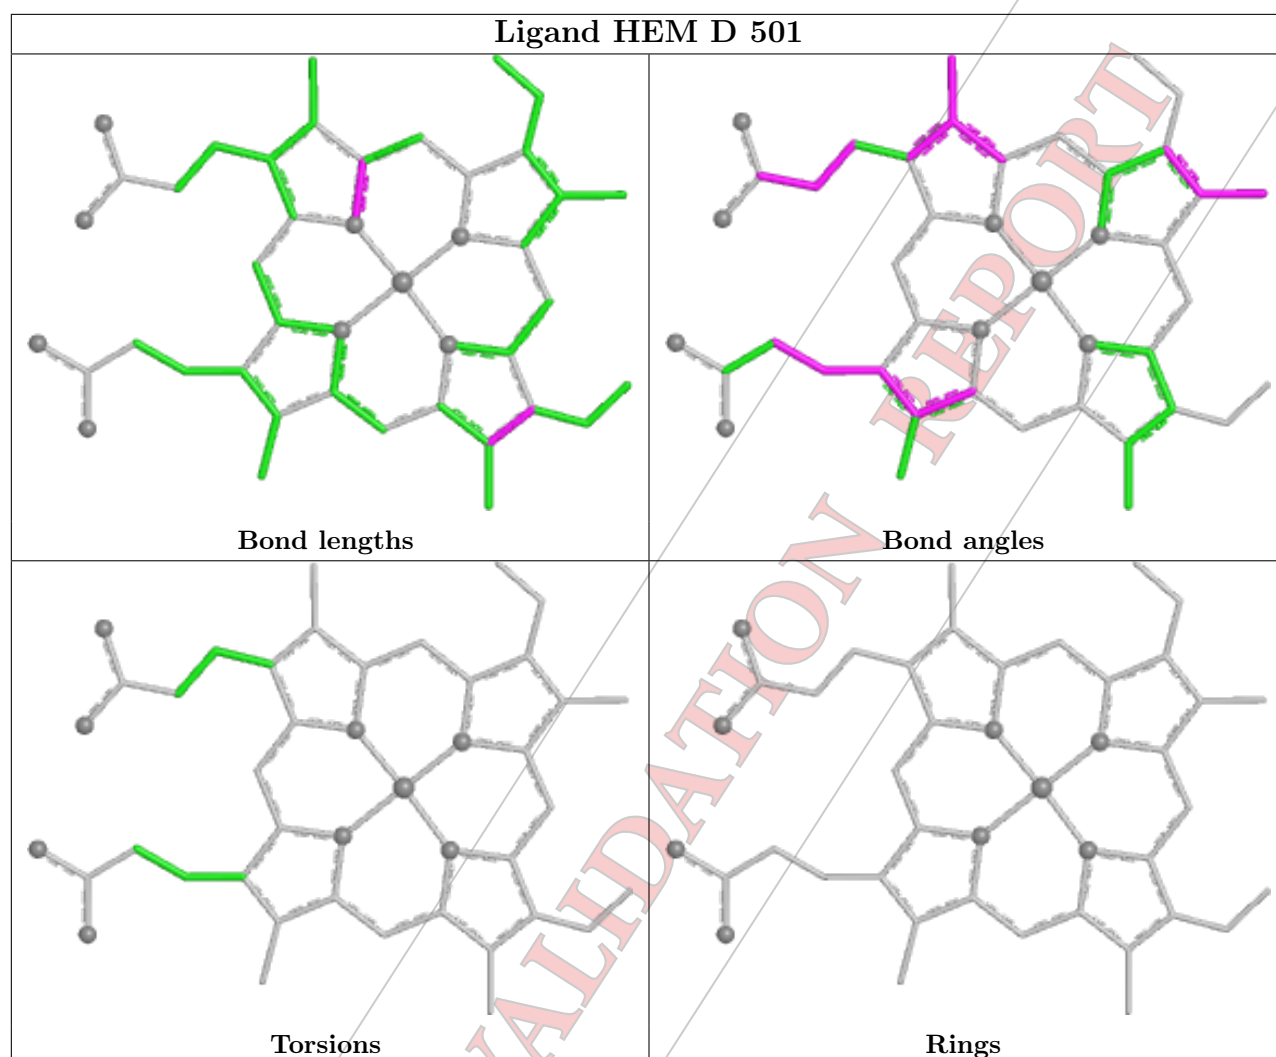

## 5.7 Other polymers [i](#)

There are no such residues in this entry.

## 5.8 Polymer linkage issues [i](#)

There are no chain breaks in this entry.

## 6 Fit of model and data [i](#)

### 6.1 Protein, DNA and RNA chains [i](#)

In the following table, the column labelled '#RSRZ > 2' contains the number (and percentage) of RSRZ outliers, followed by percent RSRZ outliers for the chain as percentile scores relative to all X-ray entries and entries of similar resolution. The OWAB column contains the minimum, median, 95<sup>th</sup> percentile and maximum values of the occupancy-weighted average B-factor per residue. The column labelled 'Q < 0.9' lists the number of (and percentage) of residues with an average occupancy less than 0.9.

| Mol | Chain | Analysed         | <RSRZ> | #RSRZ > 2     | OWAB(Å <sup>2</sup> ) | Q < 0.9 |
|-----|-------|------------------|--------|---------------|-----------------------|---------|
| 1   | A     | 396/396 (100%)   | 0.46   | 29 (7%) 15 18 | 31, 47, 70, 110       | 0       |
| 1   | D     | 396/396 (100%)   | 0.62   | 40 (10%) 7 8  | 39, 57, 84, 153       | 0       |
| 1   | F     | 396/396 (100%)   | 1.41   | 103 (26%) 0 0 | 42, 68, 107, 127      | 0       |
| 2   | B     | 402/402 (100%)   | 0.38   | 29 (7%) 15 19 | 33, 49, 76, 136       | 0       |
| 3   | C     | 408/408 (100%)   | 0.31   | 18 (4%) 34 39 | 34, 46, 71, 145       | 0       |
| 4   | E     | 395/395 (100%)   | 0.95   | 85 (21%) 0 0  | 44, 63, 96, 166       | 0       |
| All | All   | 2393/2393 (100%) | 0.69   | 304 (12%) 3 4 | 31, 54, 95, 166       | 0       |

All (304) RSRZ outliers are listed below:

| Mol | Chain | Res   | Type | RSRZ |
|-----|-------|-------|------|------|
| 4   | E     | 212   | THR  | 11.6 |
| 1   | F     | 405   | VAL  | 11.1 |
| 1   | F     | 262   | THR  | 10.4 |
| 2   | B     | 10[A] | PRO  | 9.3  |
| 1   | F     | 127   | LEU  | 9.0  |
| 1   | F     | 277   | VAL  | 8.9  |
| 4   | E     | 211   | PRO  | 8.8  |
| 2   | B     | 209   | ASP  | 8.6  |
| 3   | C     | 9     | THR  | 8.2  |
| 1   | D     | 226   | ASP  | 7.9  |
| 1   | F     | 342   | GLU  | 7.8  |
| 1   | F     | 124   | VAL  | 7.7  |
| 1   | F     | 343   | ARG  | 7.5  |
| 1   | F     | 125   | ARG  | 7.2  |
| 1   | F     | 21    | LEU  | 7.1  |
| 1   | F     | 380   | LEU  | 6.9  |
| 4   | E     | 313   | ALA  | 6.7  |
| 1   | F     | 132   | LEU  | 6.7  |
| 1   | F     | 129   | ASP  | 6.6  |

Continued on next page...

*Continued from previous page...*

| Mol | Chain | Res | Type | RSRZ |
|-----|-------|-----|------|------|
| 1   | F     | 123 | ARG  | 6.5  |
| 1   | F     | 385 | PRO  | 6.4  |
| 4   | E     | 265 | LYS  | 6.4  |
| 1   | F     | 406 | SER  | 6.2  |
| 1   | F     | 141 | PRO  | 6.1  |
| 1   | F     | 36  | ARG  | 6.1  |
| 1   | F     | 377 | PHE  | 6.1  |
| 1   | F     | 140 | SER  | 5.9  |
| 1   | F     | 382 | LEU  | 5.9  |
| 1   | F     | 267 | TYR  | 5.9  |
| 4   | E     | 306 | LEU  | 5.7  |
| 4   | E     | 209 | ASP  | 5.7  |
| 2   | B     | 210 | ALA  | 5.7  |
| 1   | F     | 261 | LEU  | 5.6  |
| 1   | D     | 210 | ALA  | 5.6  |
| 3   | C     | 123 | ARG  | 5.6  |
| 1   | F     | 328 | GLU  | 5.5  |
| 1   | F     | 376 | ARG  | 5.4  |
| 4   | E     | 343 | ARG  | 5.4  |
| 1   | F     | 274 | PRO  | 5.4  |
| 1   | F     | 273 | ASP  | 5.4  |
| 1   | F     | 265 | LYS  | 5.3  |
| 1   | F     | 126 | SER  | 5.3  |
| 1   | F     | 270 | LEU  | 5.2  |
| 1   | F     | 327 | ASP  | 5.2  |
| 2   | B     | 211 | PRO  | 5.1  |
| 1   | F     | 340 | HIS  | 5.0  |
| 1   | D     | 209 | ASP  | 5.0  |
| 1   | F     | 142 | ALA  | 5.0  |
| 1   | F     | 27  | LEU  | 4.9  |
| 2   | B     | 6   | THR  | 4.9  |
| 4   | E     | 213 | GLU  | 4.9  |
| 1   | F     | 272 | ALA  | 4.9  |
| 1   | F     | 271 | VAL  | 4.8  |
| 3   | C     | 11  | ALA  | 4.7  |
| 1   | F     | 333 | HIS  | 4.6  |
| 1   | A     | 12  | ASP  | 4.6  |
| 1   | F     | 379 | THR  | 4.6  |
| 1   | D     | 227 | ASP  | 4.5  |
| 1   | F     | 332 | ASP  | 4.5  |
| 1   | F     | 407 | TRP  | 4.5  |
| 1   | D     | 228 | HIS  | 4.5  |

*Continued on next page...*



*Continued from previous page...*

| Mol | Chain | Res    | Type | RSRZ |
|-----|-------|--------|------|------|
| 1   | F     | 269    | SER  | 4.5  |
| 4   | E     | 90     | PRO  | 4.4  |
| 1   | D     | 223    | THR  | 4.4  |
| 1   | D     | 208    | ARG  | 4.4  |
| 1   | F     | 337    | LEU  | 4.4  |
| 4   | E     | 271    | VAL  | 4.4  |
| 4   | E     | 308    | THR  | 4.4  |
| 1   | F     | 284[A] | MET  | 4.4  |
| 1   | F     | 37     | ASP  | 4.3  |
| 1   | F     | 137    | ALA  | 4.3  |
| 1   | F     | 23     | HIS  | 4.3  |
| 4   | E     | 27     | LEU  | 4.3  |
| 4   | E     | 332    | ASP  | 4.2  |
| 1   | F     | 136    | VAL  | 4.2  |
| 1   | F     | 131    | LEU  | 4.2  |
| 1   | F     | 388    | GLY  | 4.1  |
| 1   | F     | 215    | LEU  | 4.1  |
| 3   | C     | 8      | PRO  | 4.1  |
| 4   | E     | 312    | ARG  | 4.0  |
| 4   | E     | 330    | VAL  | 4.0  |
| 2   | B     | 9[A]   | THR  | 4.0  |
| 1   | F     | 378    | PRO  | 3.9  |
| 4   | E     | 333    | HIS  | 3.9  |
| 1   | D     | 406    | SER  | 3.8  |
| 4   | E     | 310    | THR  | 3.8  |
| 4   | E     | 342    | GLU  | 3.8  |
| 1   | A     | 189    | ILE  | 3.8  |
| 1   | D     | 224    | ASP  | 3.8  |
| 2   | B     | 333    | HIS  | 3.7  |
| 4   | E     | 69     | ARG  | 3.7  |
| 1   | D     | 205    | ALA  | 3.7  |
| 1   | F     | 224    | ASP  | 3.7  |
| 1   | F     | 331    | PHE  | 3.7  |
| 4   | E     | 226    | ASP  | 3.7  |
| 1   | A     | 243    | ILE  | 3.7  |
| 1   | F     | 404    | ILE  | 3.6  |
| 2   | B     | 342[A] | GLU  | 3.6  |
| 4   | E     | 67     | ASP  | 3.6  |
| 4   | E     | 305    | GLU  | 3.6  |
| 4   | E     | 309    | VAL  | 3.6  |
| 2   | B     | 7      | GLY  | 3.6  |
| 4   | E     | 307    | SER  | 3.6  |

*Continued on next page...*

*Continued from previous page...*

| Mol | Chain | Res   | Type | RSRZ |
|-----|-------|-------|------|------|
| 3   | C     | 343   | ARG  | 3.5  |
| 4   | E     | 36    | ARG  | 3.5  |
| 3   | C     | 10    | PRO  | 3.5  |
| 4   | E     | 228   | HIS  | 3.5  |
| 1   | D     | 141   | PRO  | 3.5  |
| 4   | E     | 13    | ALA  | 3.4  |
| 4   | E     | 29    | PRO  | 3.4  |
| 3   | C     | 5     | HIS  | 3.4  |
| 1   | F     | 225   | ASN  | 3.4  |
| 1   | F     | 374   | VAL  | 3.4  |
| 1   | F     | 208   | ARG  | 3.4  |
| 1   | F     | 268   | GLU  | 3.4  |
| 4   | E     | 304   | VAL  | 3.4  |
| 1   | F     | 402   | ARG  | 3.4  |
| 4   | E     | 329   | GLU  | 3.4  |
| 4   | E     | 37    | ASP  | 3.3  |
| 2   | B     | 213   | GLU  | 3.3  |
| 1   | D     | 225   | ASN  | 3.3  |
| 1   | A     | 192   | VAL  | 3.3  |
| 4   | E     | 34    | LEU  | 3.3  |
| 4   | E     | 385   | PRO  | 3.3  |
| 4   | E     | 300   | ALA  | 3.3  |
| 4   | E     | 227   | ASP  | 3.2  |
| 1   | A     | 92[A] | TRP  | 3.2  |
| 1   | F     | 329   | GLU  | 3.2  |
| 2   | B     | 357   | ILE  | 3.2  |
| 2   | B     | 228   | HIS  | 3.2  |
| 1   | F     | 400   | LEU  | 3.2  |
| 1   | F     | 339   | PHE  | 3.2  |
| 4   | E     | 24    | ALA  | 3.2  |
| 1   | F     | 307   | SER  | 3.2  |
| 1   | F     | 371   | SER  | 3.2  |
| 1   | F     | 29    | PRO  | 3.1  |
| 1   | A     | 44[A] | ARG  | 3.1  |
| 4   | E     | 301   | THR  | 3.1  |
| 4   | E     | 388   | GLY  | 3.1  |
| 1   | D     | 184   | LEU  | 3.1  |
| 1   | A     | 13    | ALA  | 3.1  |
| 4   | E     | 328   | GLU  | 3.1  |
| 4   | E     | 223   | THR  | 3.1  |
| 4   | E     | 331   | PHE  | 3.1  |
| 4   | E     | 60    | ASP  | 3.0  |

*Continued on next page...*

*Continued from previous page...*

| Mol | Chain | Res    | Type | RSRZ |
|-----|-------|--------|------|------|
| 1   | D     | 220    | ALA  | 3.0  |
| 1   | F     | 384    | GLU  | 3.0  |
| 1   | D     | 357    | ILE  | 3.0  |
| 1   | D     | 267    | TYR  | 3.0  |
| 1   | F     | 130    | SER  | 3.0  |
| 1   | A     | 209    | ASP  | 3.0  |
| 4   | E     | 229    | LEU  | 3.0  |
| 1   | F     | 375    | ARG  | 2.9  |
| 4   | E     | 189    | ILE  | 2.9  |
| 2   | B     | 227    | ASP  | 2.9  |
| 4   | E     | 23     | HIS  | 2.9  |
| 4   | E     | 338    | ASP  | 2.9  |
| 4   | E     | 335    | ASP  | 2.9  |
| 1   | F     | 330    | VAL  | 2.9  |
| 1   | A     | 177    | ALA  | 2.9  |
| 4   | E     | 33     | GLU  | 2.9  |
| 1   | F     | 326    | ARG  | 2.9  |
| 4   | E     | 327    | ASP  | 2.9  |
| 1   | F     | 165    | LEU  | 2.9  |
| 1   | F     | 280    | ALA  | 2.9  |
| 4   | E     | 285    | LEU  | 2.8  |
| 1   | A     | 224    | ASP  | 2.8  |
| 1   | D     | 333    | HIS  | 2.8  |
| 4   | E     | 340    | HIS  | 2.8  |
| 4   | E     | 311    | VAL  | 2.8  |
| 1   | F     | 383    | ALA  | 2.8  |
| 1   | A     | 85     | PRO  | 2.8  |
| 1   | F     | 387    | ALA  | 2.7  |
| 4   | E     | 225    | ASN  | 2.7  |
| 1   | F     | 128    | VAL  | 2.7  |
| 1   | A     | 180[A] | SER  | 2.7  |
| 1   | A     | 179    | LEU  | 2.7  |
| 4   | E     | 64     | VAL  | 2.7  |
| 1   | D     | 332    | ASP  | 2.7  |
| 4   | E     | 140    | SER  | 2.7  |
| 4   | E     | 406    | SER  | 2.7  |
| 1   | D     | 263    | GLU  | 2.7  |
| 1   | D     | 137    | ALA  | 2.7  |
| 1   | F     | 22     | PRO  | 2.7  |
| 4   | E     | 274    | PRO  | 2.7  |
| 4   | E     | 21     | LEU  | 2.7  |
| 1   | F     | 386    | VAL  | 2.6  |

*Continued on next page...*

*Continued from previous page...*

| Mol | Chain | Res    | Type | RSRZ |
|-----|-------|--------|------|------|
| 4   | E     | 268    | GLU  | 2.6  |
| 1   | D     | 27     | LEU  | 2.6  |
| 1   | F     | 139    | GLY  | 2.6  |
| 1   | F     | 346    | HIS  | 2.6  |
| 4   | E     | 383    | ALA  | 2.6  |
| 1   | F     | 335    | ASP  | 2.6  |
| 1   | D     | 36     | ARG  | 2.6  |
| 1   | F     | 287    | TYR  | 2.6  |
| 1   | F     | 57     | ARG  | 2.6  |
| 3   | C     | 4[A]   | THR  | 2.6  |
| 1   | D     | 385    | PRO  | 2.6  |
| 4   | E     | 43     | VAL  | 2.6  |
| 1   | F     | 263    | GLU  | 2.6  |
| 1   | A     | 94     | LEU  | 2.6  |
| 1   | F     | 389    | LEU  | 2.6  |
| 2   | B     | 265    | LYS  | 2.5  |
| 2   | B     | 291    | VAL  | 2.5  |
| 1   | F     | 308    | THR  | 2.5  |
| 1   | F     | 364    | LEU  | 2.5  |
| 3   | C     | 291    | VAL  | 2.5  |
| 1   | A     | 379    | THR  | 2.5  |
| 4   | E     | 39     | PRO  | 2.5  |
| 4   | E     | 261    | LEU  | 2.5  |
| 4   | E     | 136    | VAL  | 2.5  |
| 3   | C     | 14     | VAL  | 2.5  |
| 4   | E     | 208    | ARG  | 2.5  |
| 4   | E     | 303    | ASP  | 2.5  |
| 3   | C     | 84     | PHE  | 2.5  |
| 4   | E     | 272    | ALA  | 2.5  |
| 1   | F     | 58     | MET  | 2.4  |
| 1   | F     | 122    | PRO  | 2.4  |
| 1   | A     | 236[A] | ASN  | 2.4  |
| 4   | E     | 302    | GLU  | 2.4  |
| 1   | A     | 187    | ALA  | 2.4  |
| 4   | E     | 25     | LEU  | 2.4  |
| 1   | F     | 38     | GLU  | 2.4  |
| 1   | D     | 359    | ALA  | 2.4  |
| 4   | E     | 339    | PHE  | 2.4  |
| 2   | B     | 221    | LEU  | 2.4  |
| 4   | E     | 337    | LEU  | 2.4  |
| 4   | E     | 387    | ALA  | 2.4  |
| 1   | F     | 192    | VAL  | 2.4  |

*Continued on next page...*

*Continued from previous page...*

| Mol | Chain | Res    | Type | RSRZ |
|-----|-------|--------|------|------|
| 1   | D     | 24     | ALA  | 2.4  |
| 1   | A     | 182    | THR  | 2.4  |
| 1   | A     | 47     | TYR  | 2.4  |
| 1   | D     | 358    | GLY  | 2.4  |
| 1   | D     | 380    | LEU  | 2.4  |
| 1   | A     | 16     | ALA  | 2.4  |
| 1   | A     | 181    | SER  | 2.4  |
| 1   | D     | 189    | ILE  | 2.4  |
| 4   | E     | 28     | ASP  | 2.4  |
| 1   | F     | 370    | LEU  | 2.3  |
| 1   | F     | 121    | ARG  | 2.3  |
| 4   | E     | 334    | ALA  | 2.3  |
| 4   | E     | 287    | TYR  | 2.3  |
| 1   | D     | 94     | LEU  | 2.3  |
| 3   | C     | 184    | LEU  | 2.3  |
| 4   | E     | 42     | ARG  | 2.3  |
| 1   | D     | 231    | LYS  | 2.3  |
| 1   | F     | 347    | ILE  | 2.3  |
| 2   | B     | 204    | VAL  | 2.3  |
| 1   | A     | 267    | TYR  | 2.3  |
| 1   | D     | 342    | GLU  | 2.3  |
| 3   | C     | 189    | ILE  | 2.3  |
| 4   | E     | 269    | SER  | 2.3  |
| 1   | F     | 147    | PHE  | 2.3  |
| 1   | F     | 336    | GLU  | 2.3  |
| 4   | E     | 207    | ARG  | 2.3  |
| 4   | E     | 166    | GLU  | 2.3  |
| 1   | D     | 337[A] | LEU  | 2.2  |
| 1   | F     | 276    | LEU  | 2.2  |
| 3   | C     | 396    | LEU  | 2.2  |
| 1   | A     | 265    | LYS  | 2.2  |
| 2   | B     | 406    | SER  | 2.2  |
| 1   | D     | 257    | VAL  | 2.2  |
| 1   | D     | 386    | VAL  | 2.2  |
| 2   | B     | 225    | ASN  | 2.2  |
| 4   | E     | 106[A] | ARG  | 2.2  |
| 3   | C     | 342    | GLU  | 2.2  |
| 2   | B     | 224    | ASP  | 2.2  |
| 1   | F     | 264    | ARG  | 2.2  |
| 4   | E     | 382    | LEU  | 2.1  |
| 1   | F     | 213    | GLU  | 2.1  |
| 2   | B     | 271    | VAL  | 2.1  |

*Continued on next page...*

Continued from previous page...

| Mol | Chain | Res  | Type | RSRZ |
|-----|-------|------|------|------|
| 3   | C     | 394  | GLY  | 2.1  |
| 1   | A     | 81   | PRO  | 2.1  |
| 1   | A     | 141  | PRO  | 2.1  |
| 1   | D     | 330  | VAL  | 2.1  |
| 4   | E     | 299  | VAL  | 2.1  |
| 1   | D     | 334  | ALA  | 2.1  |
| 1   | F     | 59   | SER  | 2.1  |
| 2   | B     | 222  | ALA  | 2.1  |
| 1   | F     | 279  | ALA  | 2.1  |
| 1   | F     | 138  | HIS  | 2.1  |
| 2   | B     | 136  | VAL  | 2.1  |
| 1   | A     | 210  | ALA  | 2.1  |
| 1   | F     | 134  | ASP  | 2.1  |
| 1   | D     | 329  | GLU  | 2.1  |
| 2   | B     | 159  | GLU  | 2.1  |
| 3   | C     | 7    | GLY  | 2.1  |
| 1   | D     | 241  | LEU  | 2.1  |
| 1   | A     | 184  | LEU  | 2.0  |
| 1   | F     | 26   | ASP  | 2.0  |
| 2   | B     | 332  | ASP  | 2.0  |
| 2   | B     | 335  | ASP  | 2.0  |
| 2   | B     | 8[A] | PRO  | 2.0  |
| 1   | A     | 86   | THR  | 2.0  |
| 1   | D     | 192  | VAL  | 2.0  |
| 4   | E     | 210  | ALA  | 2.0  |
| 4   | E     | 314  | GLY  | 2.0  |
| 2   | B     | 285  | LEU  | 2.0  |
| 4   | E     | 336  | GLU  | 2.0  |
| 2   | B     | 350  | GLY  | 2.0  |
| 1   | F     | 209  | ASP  | 2.0  |
| 3   | C     | 333  | HIS  | 2.0  |
| 1   | A     | 262  | THR  | 2.0  |
| 1   | D     | 179  | LEU  | 2.0  |

## 6.2 Non-standard residues in protein, DNA, RNA chains [i](#)

There are no non-standard protein/DNA/RNA residues in this entry.

## 6.3 Carbohydrates [i](#)

There are no monosaccharides in this entry.

## 6.4 Ligands

In the following table, the Atoms column lists the number of modelled atoms in the group and the number defined in the chemical component dictionary. The B-factors column lists the minimum, median, 95<sup>th</sup> percentile and maximum values of B factors of atoms in the group. The column labelled 'Q< 0.9' lists the number of atoms with occupancy less than 0.9.

| Mol | Type | Chain | Res  | Atoms | RSCC  | RSR  | B-factors(Å <sup>2</sup> ) | Q<0.9 |
|-----|------|-------|------|-------|-------|------|----------------------------|-------|
| 7   | FMT  | H     | 920  | 3/?   | -0.12 | 0.37 | 98,98,105,106              | 0     |
| 7   | FMT  | H     | 6    | 3/?   | 0.25  | 0.28 | 94,94,106,108              | 0     |
| 7   | FMT  | H     | 62   | 3/?   | 0.28  | 0.44 | 86,86,95,100               | 0     |
| 7   | FMT  | H     | 929  | 3/?   | 0.32  | 0.43 | 88,88,95,108               | 0     |
| 7   | FMT  | H     | 976  | 3/?   | 0.33  | 0.47 | 89,89,102,105              | 0     |
| 7   | FMT  | H     | 905  | 3/?   | 0.34  | 0.35 | 95,95,108,112              | 0     |
| 7   | FMT  | H     | 909  | 3/?   | 0.35  | 0.25 | 90,90,95,99                | 0     |
| 7   | FMT  | H     | 915  | 3/?   | 0.37  | 0.33 | 66,66,85,86                | 0     |
| 7   | FMT  | H     | 972  | 3/?   | 0.40  | 0.36 | 73,73,82,94                | 0     |
| 7   | FMT  | H     | 32   | 3/?   | 0.40  | 0.23 | 85,85,106,110              | 0     |
| 7   | FMT  | H     | 1036 | 3/?   | 0.40  | 0.65 | 75,75,80,94                | 0     |
| 7   | FMT  | H     | 1062 | 3/?   | 0.41  | 0.29 | 91,91,92,97                | 0     |
| 7   | FMT  | H     | 7    | 3/?   | 0.42  | 0.37 | 83,83,83,88                | 0     |
| 7   | FMT  | H     | 1005 | 3/?   | 0.44  | 0.47 | 86,86,94,101               | 0     |
| 7   | FMT  | H     | 96   | 3/?   | 0.45  | 0.15 | 94,94,104,106              | 0     |
| 7   | FMT  | H     | 1020 | 3/?   | 0.45  | 0.52 | 94,94,101,105              | 0     |
| 7   | FMT  | H     | 14   | 3/?   | 0.46  | 0.17 | 76,76,87,92                | 0     |
| 7   | FMT  | H     | 937  | 3/?   | 0.47  | 0.26 | 78,78,91,94                | 0     |
| 7   | FMT  | H     | 948  | 3/?   | 0.49  | 0.36 | 99,99,102,106              | 0     |
| 7   | FMT  | H     | 966  | 3/?   | 0.49  | 0.22 | 88,88,88,101               | 0     |
| 7   | FMT  | H     | 1030 | 3/?   | 0.50  | 0.16 | 92,92,107,121              | 0     |
| 7   | FMT  | H     | 997  | 3/?   | 0.50  | 0.30 | 78,78,93,93                | 0     |
| 7   | FMT  | H     | 1023 | 3/?   | 0.50  | 0.16 | 106,106,107,108            | 0     |
| 7   | FMT  | H     | 938  | 3/?   | 0.51  | 0.22 | 78,78,80,96                | 0     |
| 7   | FMT  | H     | 65   | 3/?   | 0.51  | 0.33 | 84,84,95,97                | 0     |
| 7   | FMT  | H     | 1004 | 3/?   | 0.51  | 0.55 | 73,73,88,91                | 0     |
| 9   | GOL  | K     | 11   | 6/?   | 0.53  | 0.53 | 76,93,96,109               | 0     |
| 7   | FMT  | H     | 1033 | 3/?   | 0.55  | 0.33 | 81,81,92,92                | 0     |
| 7   | FMT  | H     | 66   | 3/?   | 0.56  | 0.24 | 64,64,65,76                | 0     |
| 7   | FMT  | H     | 946  | 3/?   | 0.56  | 0.23 | 76,76,77,92                | 0     |
| 7   | FMT  | H     | 968  | 3/?   | 0.56  | 0.28 | 75,75,80,81                | 0     |
| 7   | FMT  | H     | 940  | 3/?   | 0.57  | 0.54 | 86,86,93,103               | 0     |
| 9   | GOL  | K     | 3    | 6/?   | 0.58  | 0.27 | 70,88,89,89                | 0     |
| 7   | FMT  | H     | 1028 | 3/?   | 0.58  | 0.19 | 71,71,92,93                | 0     |
| 7   | FMT  | H     | 1025 | 3/?   | 0.59  | 0.26 | 74,74,87,103               | 0     |
| 7   | FMT  | H     | 908  | 3/?   | 0.59  | 0.34 | 78,78,87,100               | 0     |

Continued on next page...



Continued from previous page...

| Mol | Type | Chain | Res  | Atoms | RSCC | RSR  | B-factors( $\text{\AA}^2$ ) | Q<0.9 |
|-----|------|-------|------|-------|------|------|-----------------------------|-------|
| 7   | FMT  | H     | 1040 | 3/?   | 0.60 | 0.39 | 71,71,74,83                 | 0     |
| 7   | FMT  | H     | 41   | 3/?   | 0.60 | 0.31 | 50,50,61,75                 | 0     |
| 7   | FMT  | H     | 928  | 3/?   | 0.60 | 0.46 | 85,85,99,101                | 0     |
| 7   | FMT  | H     | 1021 | 3/?   | 0.60 | 0.41 | 78,78,83,97                 | 0     |
| 7   | FMT  | H     | 72   | 3/?   | 0.61 | 0.45 | 59,59,73,85                 | 0     |
| 7   | FMT  | H     | 917  | 3/?   | 0.62 | 0.46 | 68,68,84,86                 | 0     |
| 7   | FMT  | H     | 1064 | 3/?   | 0.62 | 0.38 | 72,72,77,79                 | 0     |
| 7   | FMT  | H     | 998  | 3/?   | 0.62 | 0.46 | 83,83,95,112                | 0     |
| 7   | FMT  | H     | 1006 | 3/?   | 0.62 | 0.17 | 73,73,73,81                 | 0     |
| 7   | FMT  | H     | 995  | 3/?   | 0.63 | 0.19 | 102,102,102,106             | 0     |
| 7   | FMT  | H     | 944  | 3/?   | 0.65 | 0.18 | 61,61,74,90                 | 0     |
| 7   | FMT  | H     | 969  | 3/?   | 0.67 | 0.20 | 79,79,91,92                 | 0     |
| 9   | GOL  | K     | 5    | 6/?   | 0.67 | 0.41 | 58,72,83,91                 | 0     |
| 7   | FMT  | H     | 911  | 3/?   | 0.67 | 0.29 | 79,79,90,95                 | 0     |
| 7   | FMT  | H     | 95   | 3/?   | 0.68 | 0.32 | 63,63,85,89                 | 0     |
| 7   | FMT  | H     | 925  | 3/?   | 0.69 | 0.31 | 89,89,99,101                | 0     |
| 7   | FMT  | H     | 912  | 3/?   | 0.69 | 0.21 | 85,85,94,101                | 0     |
| 7   | FMT  | H     | 1069 | 3/?   | 0.69 | 0.35 | 86,86,87,89                 | 0     |
| 7   | FMT  | H     | 71   | 3/?   | 0.69 | 0.16 | 68,68,73,84                 | 0     |
| 7   | FMT  | H     | 961  | 3/?   | 0.69 | 0.24 | 79,79,85,87                 | 0     |
| 7   | FMT  | H     | 1058 | 3/?   | 0.69 | 0.22 | 65,65,73,78                 | 0     |
| 7   | FMT  | H     | 56   | 3/?   | 0.71 | 0.33 | 86,86,87,94                 | 0     |
| 7   | FMT  | H     | 933  | 3/?   | 0.71 | 0.17 | 93,93,96,100                | 0     |
| 7   | FMT  | H     | 1019 | 3/?   | 0.72 | 0.23 | 91,91,93,97                 | 0     |
| 7   | FMT  | H     | 19   | 3/?   | 0.72 | 0.25 | 64,64,78,79                 | 0     |
| 7   | FMT  | H     | 1044 | 3/?   | 0.72 | 0.14 | 69,69,78,78                 | 0     |
| 7   | FMT  | H     | 980  | 3/?   | 0.72 | 0.31 | 92,92,98,106                | 0     |
| 7   | FMT  | H     | 984  | 3/?   | 0.72 | 0.51 | 95,95,101,103               | 0     |
| 7   | FMT  | H     | 1009 | 3/?   | 0.73 | 0.19 | 73,73,88,93                 | 0     |
| 7   | FMT  | H     | 1068 | 3/?   | 0.73 | 0.23 | 93,93,95,99                 | 0     |
| 7   | FMT  | H     | 942  | 3/?   | 0.74 | 0.17 | 64,64,78,89                 | 0     |
| 7   | FMT  | H     | 67   | 3/?   | 0.74 | 0.23 | 79,79,81,83                 | 0     |
| 7   | FMT  | H     | 57   | 3/?   | 0.74 | 0.44 | 86,86,90,92                 | 0     |
| 7   | FMT  | H     | 1045 | 3/?   | 0.74 | 0.40 | 86,86,91,92                 | 0     |
| 7   | FMT  | H     | 932  | 3/?   | 0.75 | 0.19 | 75,75,83,83                 | 0     |
| 7   | FMT  | H     | 1038 | 3/?   | 0.75 | 0.18 | 66,66,72,84                 | 0     |
| 7   | FMT  | H     | 971  | 3/?   | 0.75 | 0.19 | 60,60,64,84                 | 0     |
| 7   | FMT  | H     | 935  | 3/?   | 0.75 | 0.23 | 69,69,70,86                 | 0     |
| 7   | FMT  | H     | 1065 | 3/?   | 0.75 | 0.21 | 83,83,87,101                | 0     |
| 7   | FMT  | H     | 29   | 3/?   | 0.76 | 0.15 | 73,73,78,86                 | 0     |
| 7   | FMT  | H     | 970  | 3/?   | 0.76 | 0.16 | 78,78,83,96                 | 0     |
| 9   | GOL  | K     | 4[A] | 6/?   | 0.76 | 0.38 | 45,57,59,60                 | 6     |

Continued on next page...

Continued from previous page...

| Mol | Type | Chain | Res  | Atoms | RSCC | RSR  | B-factors(Å <sup>2</sup> ) | Q<0.9 |
|-----|------|-------|------|-------|------|------|----------------------------|-------|
| 9   | GOL  | K     | 4[B] | 6/?   | 0.76 | 0.38 | 121,125,127,128            | 6     |
| 7   | FMT  | H     | 941  | 3/?   | 0.76 | 0.26 | 80,80,89,93                | 0     |
| 7   | FMT  | H     | 960  | 3/?   | 0.76 | 0.39 | 68,68,71,80                | 0     |
| 7   | FMT  | H     | 74   | 3/?   | 0.77 | 0.34 | 91,91,93,96                | 0     |
| 7   | FMT  | H     | 955  | 3/?   | 0.77 | 0.14 | 81,81,86,94                | 0     |
| 7   | FMT  | H     | 982  | 3/?   | 0.78 | 0.17 | 74,74,81,89                | 0     |
| 7   | FMT  | H     | 979  | 3/?   | 0.78 | 0.14 | 92,92,95,97                | 0     |
| 7   | FMT  | H     | 12   | 3/?   | 0.78 | 0.23 | 61,61,71,83                | 0     |
| 7   | FMT  | H     | 1008 | 3/?   | 0.79 | 0.23 | 69,69,71,89                | 0     |
| 7   | FMT  | H     | 906  | 3/?   | 0.79 | 0.17 | 66,66,67,79                | 0     |
| 9   | GOL  | K     | 13   | 6/?   | 0.79 | 0.28 | 46,63,70,80                | 6     |
| 9   | GOL  | K     | 9    | 6/?   | 0.80 | 0.27 | 68,80,81,83                | 6     |
| 7   | FMT  | H     | 914  | 3/?   | 0.81 | 0.45 | 90,90,95,98                | 0     |
| 7   | FMT  | H     | 950  | 3/?   | 0.81 | 0.73 | 73,73,74,77                | 0     |
| 7   | FMT  | H     | 70   | 3/?   | 0.81 | 0.17 | 55,55,59,74                | 0     |
| 7   | FMT  | H     | 33   | 3/?   | 0.81 | 0.25 | 67,67,87,87                | 0     |
| 7   | FMT  | H     | 1001 | 3/?   | 0.81 | 0.37 | 72,72,79,82                | 0     |
| 7   | FMT  | H     | 934  | 3/?   | 0.81 | 0.40 | 82,82,83,89                | 0     |
| 7   | FMT  | H     | 1003 | 3/?   | 0.82 | 0.25 | 64,64,72,79                | 0     |
| 7   | FMT  | H     | 996  | 3/?   | 0.82 | 0.29 | 84,84,87,100               | 0     |
| 7   | FMT  | H     | 904  | 3/?   | 0.82 | 0.21 | 62,62,75,80                | 0     |
| 7   | FMT  | H     | 943  | 3/?   | 0.82 | 0.34 | 74,74,80,84                | 0     |
| 7   | FMT  | H     | 981  | 3/?   | 0.82 | 0.22 | 75,75,79,90                | 0     |
| 9   | GOL  | K     | 1[A] | 6/?   | 0.82 | 0.27 | 53,57,60,61                | 6     |
| 9   | GOL  | K     | 1[B] | 6/?   | 0.82 | 0.27 | 26,40,43,47                | 6     |
| 6   | DEB  | F     | 502  | 27/?  | 0.83 | 0.19 | 56,64,74,83                | 0     |
| 7   | FMT  | H     | 21   | 3/?   | 0.83 | 0.16 | 77,77,93,94                | 0     |
| 7   | FMT  | H     | 901  | 3/?   | 0.83 | 0.16 | 80,80,85,87                | 0     |
| 7   | FMT  | H     | 921  | 3/?   | 0.83 | 0.16 | 82,82,90,98                | 0     |
| 9   | GOL  | K     | 7[A] | 6/?   | 0.83 | 0.28 | 36,39,43,45                | 6     |
| 9   | GOL  | K     | 7[B] | 6/?   | 0.83 | 0.28 | 66,72,80,83                | 6     |
| 7   | FMT  | H     | 923  | 3/?   | 0.83 | 0.10 | 86,86,105,106              | 0     |
| 7   | FMT  | H     | 601  | 3/?   | 0.83 | 0.33 | 89,89,93,96                | 0     |
| 7   | FMT  | H     | 1014 | 3/?   | 0.83 | 0.17 | 84,84,86,88                | 0     |
| 7   | FMT  | H     | 1018 | 3/?   | 0.84 | 0.21 | 84,84,90,92                | 0     |
| 7   | FMT  | H     | 1024 | 3/?   | 0.85 | 0.15 | 87,87,91,93                | 0     |
| 7   | FMT  | H     | 1015 | 3/?   | 0.85 | 0.29 | 85,85,86,90                | 0     |
| 9   | GOL  | K     | 8[A] | 6/?   | 0.85 | 0.39 | 32,46,51,56                | 6     |
| 9   | GOL  | K     | 8[B] | 6/?   | 0.85 | 0.39 | 32,40,45,45                | 6     |
| 7   | FMT  | H     | 1046 | 3/?   | 0.85 | 0.34 | 50,50,51,73                | 3     |
| 7   | FMT  | H     | 10   | 3/?   | 0.85 | 0.35 | 70,70,80,90                | 0     |
| 7   | FMT  | H     | 13   | 3/?   | 0.85 | 0.21 | 58,58,60,64                | 0     |

Continued on next page...

Continued from previous page...

| Mol | Type | Chain | Res  | Atoms | RSCC | RSR  | B-factors( $\text{\AA}^2$ ) | Q<0.9 |
|-----|------|-------|------|-------|------|------|-----------------------------|-------|
| 7   | FMT  | H     | 918  | 3/?   | 0.86 | 0.29 | 61,61,70,75                 | 0     |
| 7   | FMT  | H     | 931  | 3/?   | 0.86 | 0.25 | 66,66,77,79                 | 0     |
| 7   | FMT  | H     | 919  | 3/?   | 0.86 | 0.20 | 69,69,75,81                 | 0     |
| 7   | FMT  | H     | 965  | 3/?   | 0.86 | 0.39 | 85,85,88,106                | 0     |
| 7   | FMT  | H     | 58   | 3/?   | 0.86 | 0.12 | 85,85,87,89                 | 0     |
| 7   | FMT  | H     | 1060 | 3/?   | 0.86 | 0.11 | 59,59,83,96                 | 0     |
| 7   | FMT  | H     | 1007 | 3/?   | 0.86 | 0.15 | 74,74,89,93                 | 0     |
| 6   | DEB  | Z     | 502  | 27/?  | 0.86 | 0.16 | 30,37,50,54                 | 0     |
| 7   | FMT  | H     | 64   | 3/?   | 0.86 | 0.19 | 75,75,84,84                 | 0     |
| 7   | FMT  | H     | 947  | 3/?   | 0.86 | 0.27 | 76,76,81,84                 | 0     |
| 7   | FMT  | H     | 15   | 3/?   | 0.86 | 0.27 | 57,57,64,72                 | 0     |
| 7   | FMT  | H     | 27   | 3/?   | 0.86 | 0.22 | 73,73,74,80                 | 0     |
| 6   | DEB  | E     | 502  | 27/?  | 0.87 | 0.15 | 47,53,61,74                 | 0     |
| 7   | FMT  | H     | 1047 | 3/?   | 0.87 | 0.08 | 84,84,86,89                 | 0     |
| 7   | FMT  | H     | 8    | 3/?   | 0.87 | 0.23 | 68,68,72,75                 | 0     |
| 6   | DEB  | D     | 502  | 27/?  | 0.87 | 0.17 | 32,42,46,47                 | 0     |
| 8   | NA   | I     | 6    | 1/?   | 0.87 | 0.30 | 63,63,63,63                 | 0     |
| 7   | FMT  | H     | 11   | 3/?   | 0.87 | 0.14 | 65,65,75,85                 | 0     |
| 7   | FMT  | H     | 926  | 3/?   | 0.88 | 0.19 | 76,76,80,87                 | 0     |
| 7   | FMT  | H     | 986  | 3/?   | 0.88 | 0.28 | 78,78,79,80                 | 0     |
| 7   | FMT  | H     | 94   | 3/?   | 0.88 | 0.15 | 63,63,66,68                 | 0     |
| 5   | HEM  | F     | 501  | 43/?  | 0.89 | 0.17 | 47,54,64,92                 | 0     |
| 8   | NA   | I     | 10   | 1/?   | 0.89 | 0.12 | 56,56,56,56                 | 0     |
| 7   | FMT  | H     | 939  | 3/?   | 0.89 | 0.17 | 74,74,76,84                 | 0     |
| 7   | FMT  | H     | 913  | 3/?   | 0.89 | 0.13 | 83,83,88,91                 | 0     |
| 8   | NA   | I     | 4    | 1/?   | 0.89 | 0.20 | 56,56,56,56                 | 0     |
| 7   | FMT  | H     | 20   | 3/?   | 0.90 | 0.32 | 63,63,64,82                 | 0     |
| 7   | FMT  | H     | 1053 | 3/?   | 0.91 | 0.30 | 71,71,72,93                 | 0     |
| 7   | FMT  | H     | 910  | 3/?   | 0.91 | 0.91 | 82,82,94,98                 | 0     |
| 6   | DEB  | A     | 502  | 27/?  | 0.91 | 0.21 | 30,37,50,54                 | 0     |
| 7   | FMT  | H     | 40   | 3/?   | 0.91 | 0.16 | 59,59,63,68                 | 0     |
| 7   | FMT  | H     | 1010 | 3/?   | 0.92 | 0.27 | 52,52,83,96                 | 0     |
| 5   | HEM  | E     | 501  | 43/?  | 0.92 | 0.13 | 39,44,53,66                 | 0     |
| 8   | NA   | I     | 5    | 1/?   | 0.93 | 0.22 | 63,63,63,63                 | 0     |
| 7   | FMT  | H     | 945  | 3/?   | 0.93 | 0.19 | 62,62,79,96                 | 0     |
| 6   | DEB  | B     | 502  | 27/?  | 0.93 | 0.18 | 33,40,51,59                 | 0     |
| 7   | FMT  | H     | 93   | 3/?   | 0.93 | 0.35 | 65,65,70,79                 | 0     |
| 7   | FMT  | H     | 1048 | 3/?   | 0.94 | 0.18 | 67,67,71,76                 | 0     |
| 7   | FMT  | H     | 1061 | 3/?   | 0.94 | 0.28 | 50,50,71,78                 | 0     |
| 7   | FMT  | H     | 902  | 3/?   | 0.94 | 0.15 | 46,46,67,70                 | 0     |
| 7   | FMT  | H     | 922  | 3/?   | 0.94 | 0.17 | 71,71,73,91                 | 0     |
| 5   | HEM  | D     | 501  | 43/?  | 0.95 | 0.19 | 25,36,49,62                 | 0     |

Continued on next page...

Continued from previous page...

| Mol | Type | Chain | Res | Atoms | RSCC | RSR  | B-factors( $\text{\AA}^2$ ) | Q<0.9 |
|-----|------|-------|-----|-------|------|------|-----------------------------|-------|
| 7   | FMT  | H     | 951 | 3/?   | 0.95 | 0.12 | 58,58,68,70                 | 0     |
| 7   | FMT  | H     | 31  | 3/?   | 0.95 | 0.16 | 62,62,64,66                 | 0     |
| 7   | FMT  | H     | 989 | 3/?   | 0.96 | 0.15 | 52,52,54,61                 | 0     |
| 5   | HEM  | B     | 501 | 43/?  | 0.96 | 0.18 | 29,34,45,51                 | 0     |
| 5   | HEM  | A     | 501 | 43/?  | 0.96 | 0.17 | 29,35,43,61                 | 0     |
| 8   | NA   | I     | 3   | 1/?   | 0.97 | 0.14 | 47,47,47,47                 | 0     |
| 5   | HEM  | C     | 501 | 43/?  | 0.97 | 0.16 | 31,36,41,55                 | 0     |
| 8   | NA   | I     | 13  | 1/?   | 0.97 | 0.27 | 47,47,47,47                 | 0     |
| 8   | NA   | I     | 1   | 1/?   | 0.97 | 0.14 | 52,52,52,52                 | 0     |
| 8   | NA   | I     | 2   | 1/?   | 0.98 | 0.18 | 50,50,50,50                 | 0     |

The following is a graphical depiction of the model fit to experimental electron density of all instances of the Ligand of Interest. In addition, ligands with molecular weight > 250 and outliers as shown on the geometry validation Tables will also be included. Each fit is shown from different orientation to approximate a three-dimensional view.

**Electron density around DEB F 502:**

$2mF_o-DF_c$  (at 0.7 rmsd) in gray  
 $mF_o-DF_c$  (at 3 rmsd) in purple (negative)  
and green (positive)

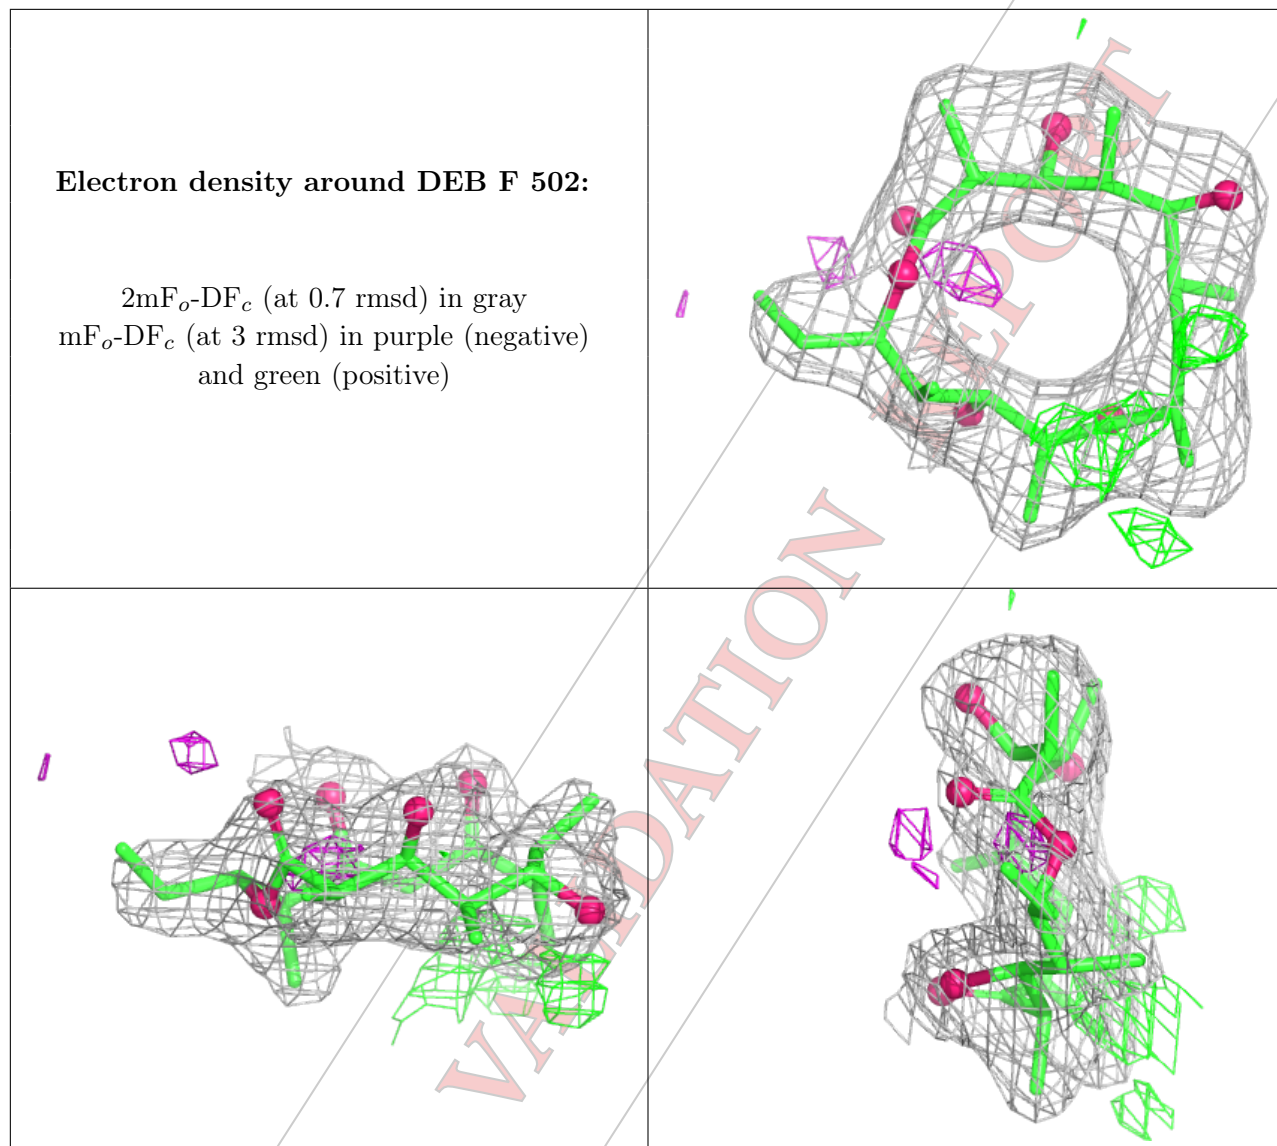



**Electron density around DEB Z 502:**

$2mF_o-DF_c$  (at 0.7 rmsd) in gray  
 $mF_o-DF_c$  (at 3 rmsd) in purple (negative)  
and green (positive)

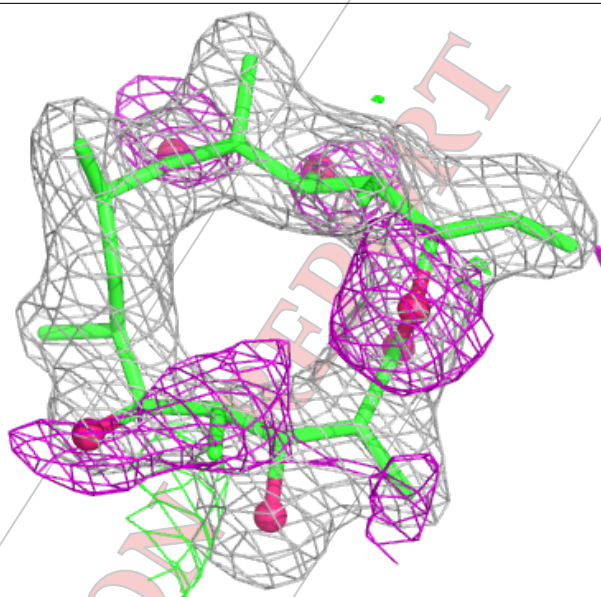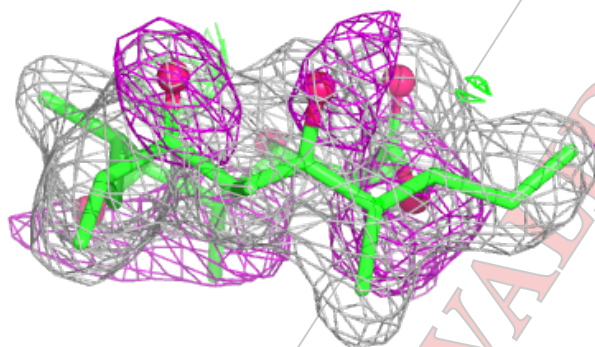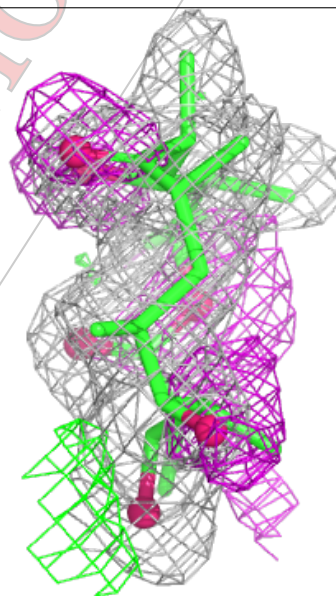

**Electron density around DEB E 502:**

$2mF_o-DF_c$  (at 0.7 rmsd) in gray  
 $mF_o-DF_c$  (at 3 rmsd) in purple (negative)  
and green (positive)

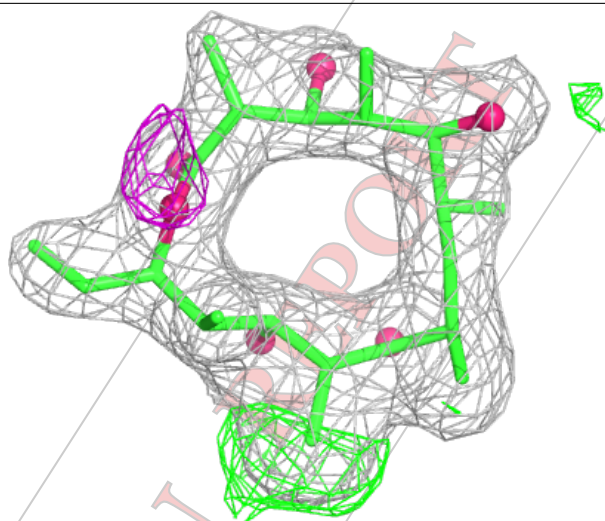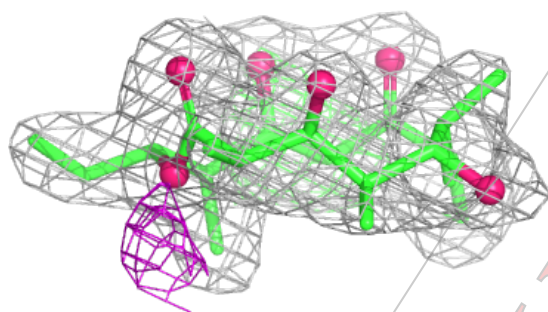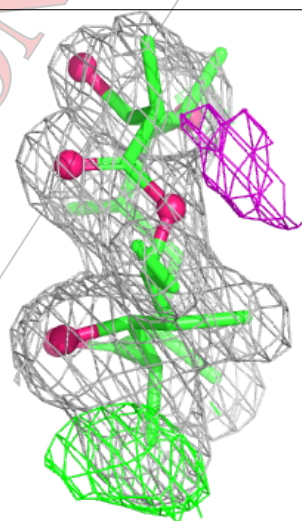



**Electron density around DEB D 502:**

$2mF_o-DF_c$  (at 0.7 rmsd) in gray  
 $mF_o-DF_c$  (at 3 rmsd) in purple (negative)  
and green (positive)

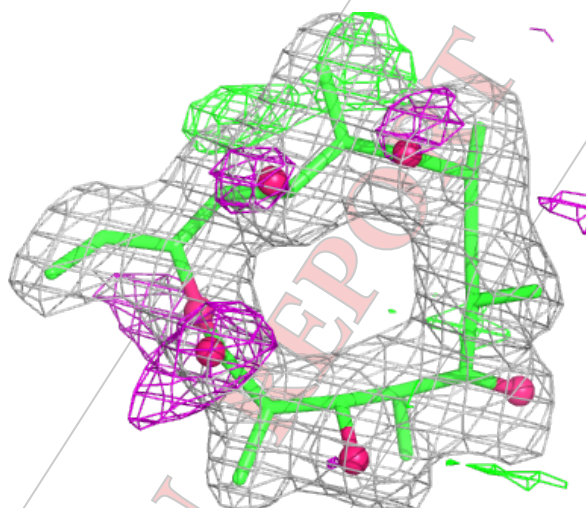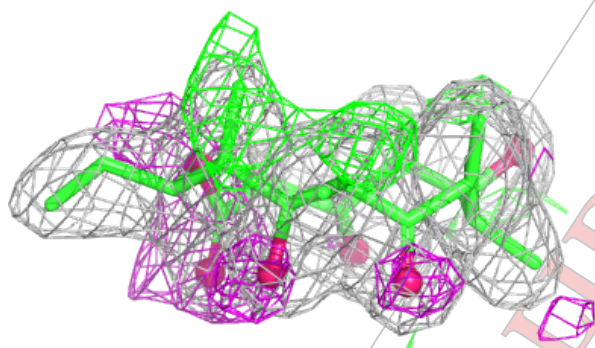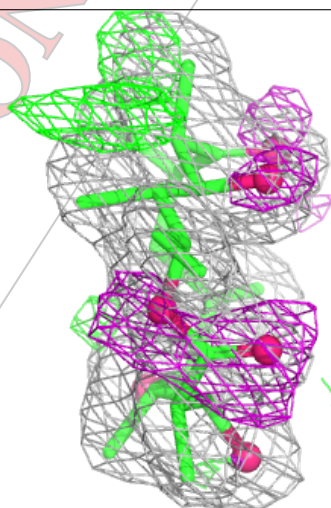

**Electron density around HEM F 501:**

$2mF_o-DF_c$  (at 0.7 rmsd) in gray  
 $mF_o-DF_c$  (at 3 rmsd) in purple (negative)  
and green (positive)

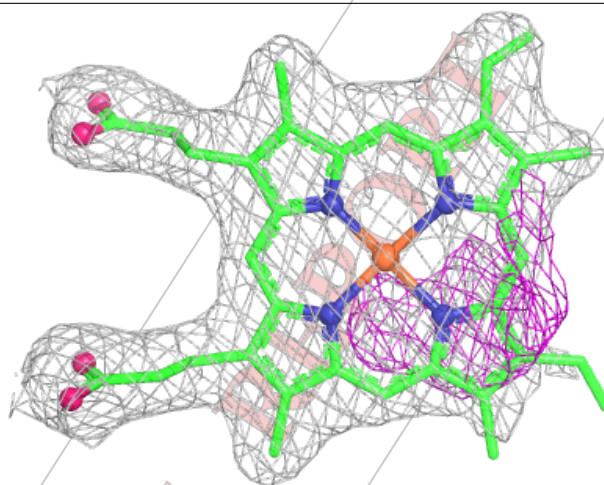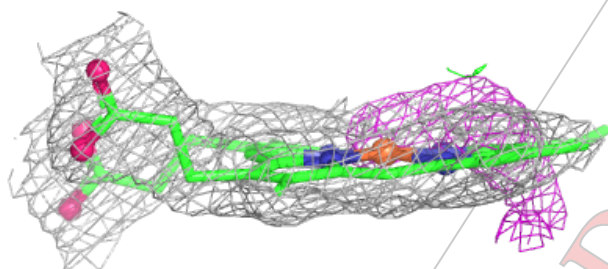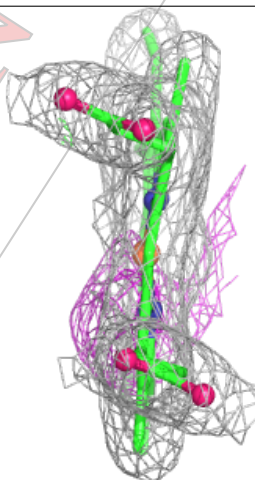

**Electron density around DEB A 502:**

$2mF_o-DF_c$  (at 0.7 rmsd) in gray  
 $mF_o-DF_c$  (at 3 rmsd) in purple (negative)  
and green (positive)

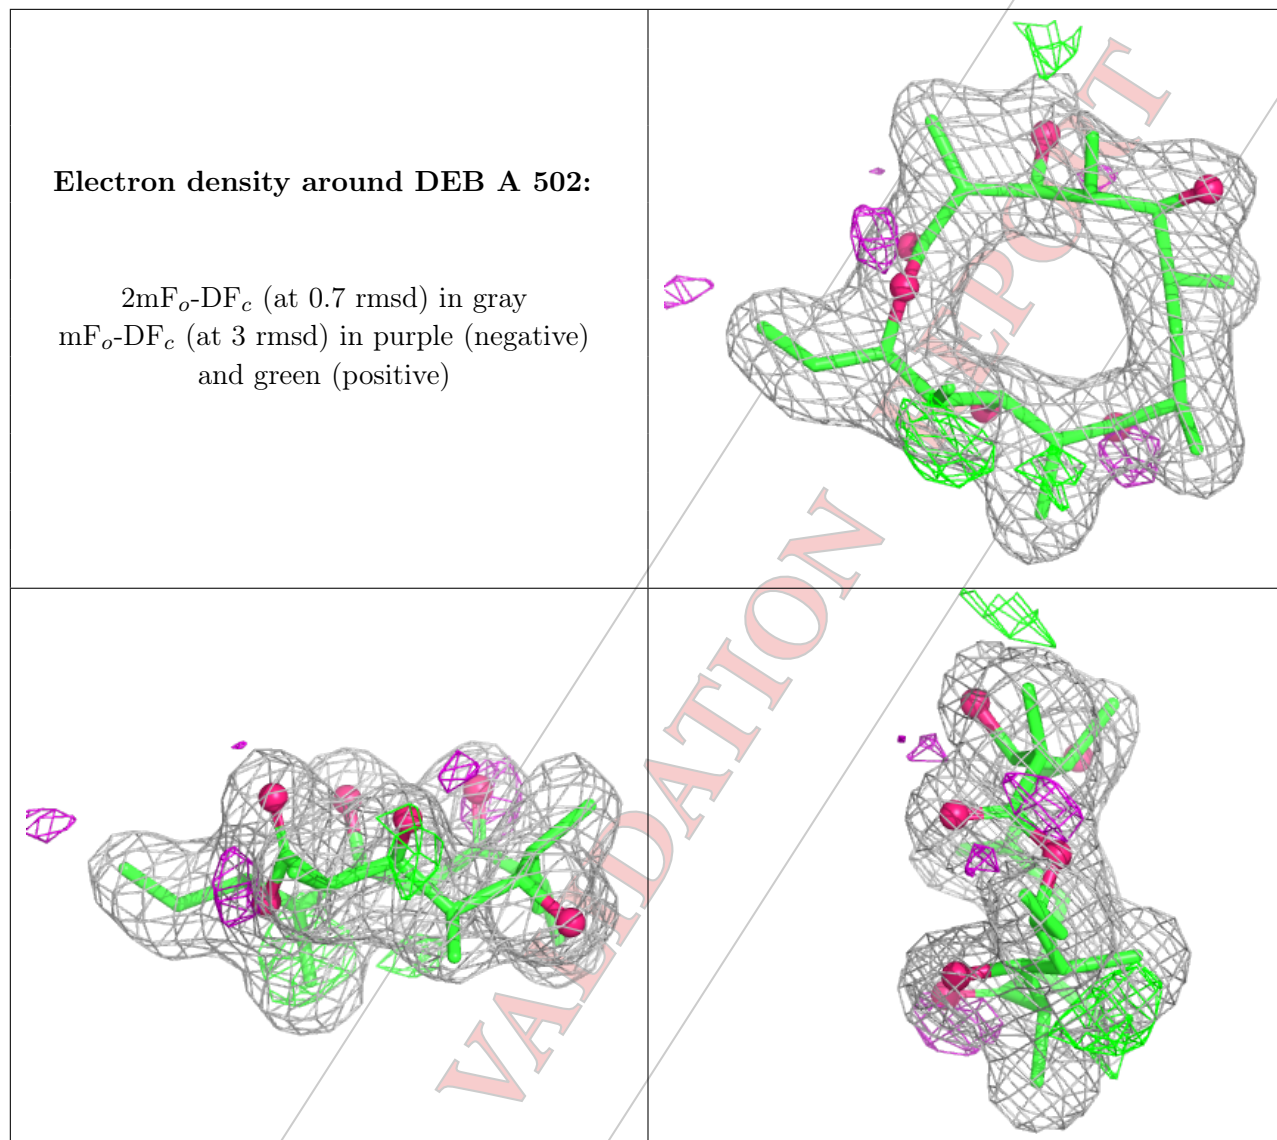

**Electron density around HEM E 501:**

$2mF_o-DF_c$  (at 0.7 rmsd) in gray  
 $mF_o-DF_c$  (at 3 rmsd) in purple (negative)  
and green (positive)

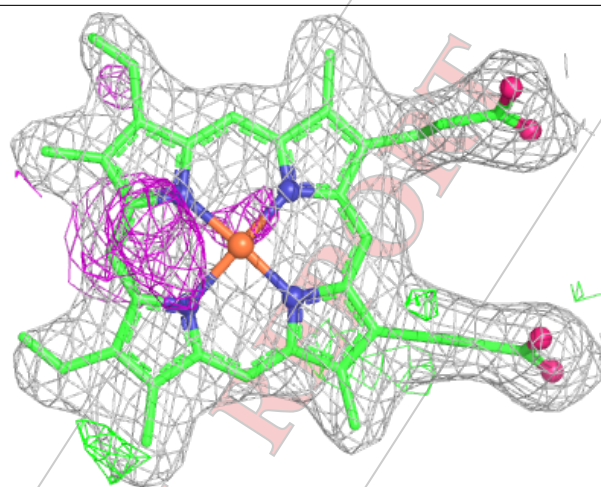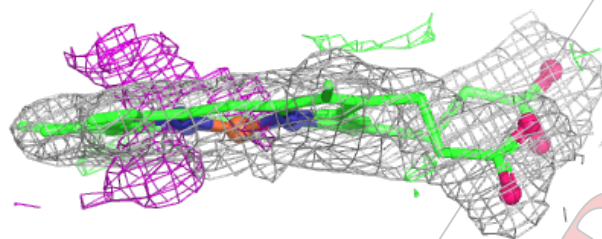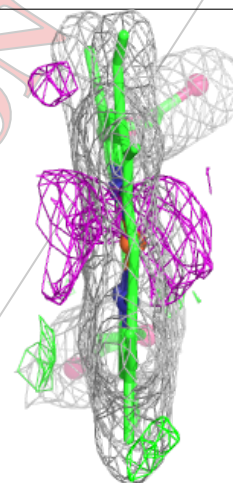



**Electron density around DEB B 502:**

$2mF_o-DF_c$  (at 0.7 rmsd) in gray  
 $mF_o-DF_c$  (at 3 rmsd) in purple (negative)  
and green (positive)

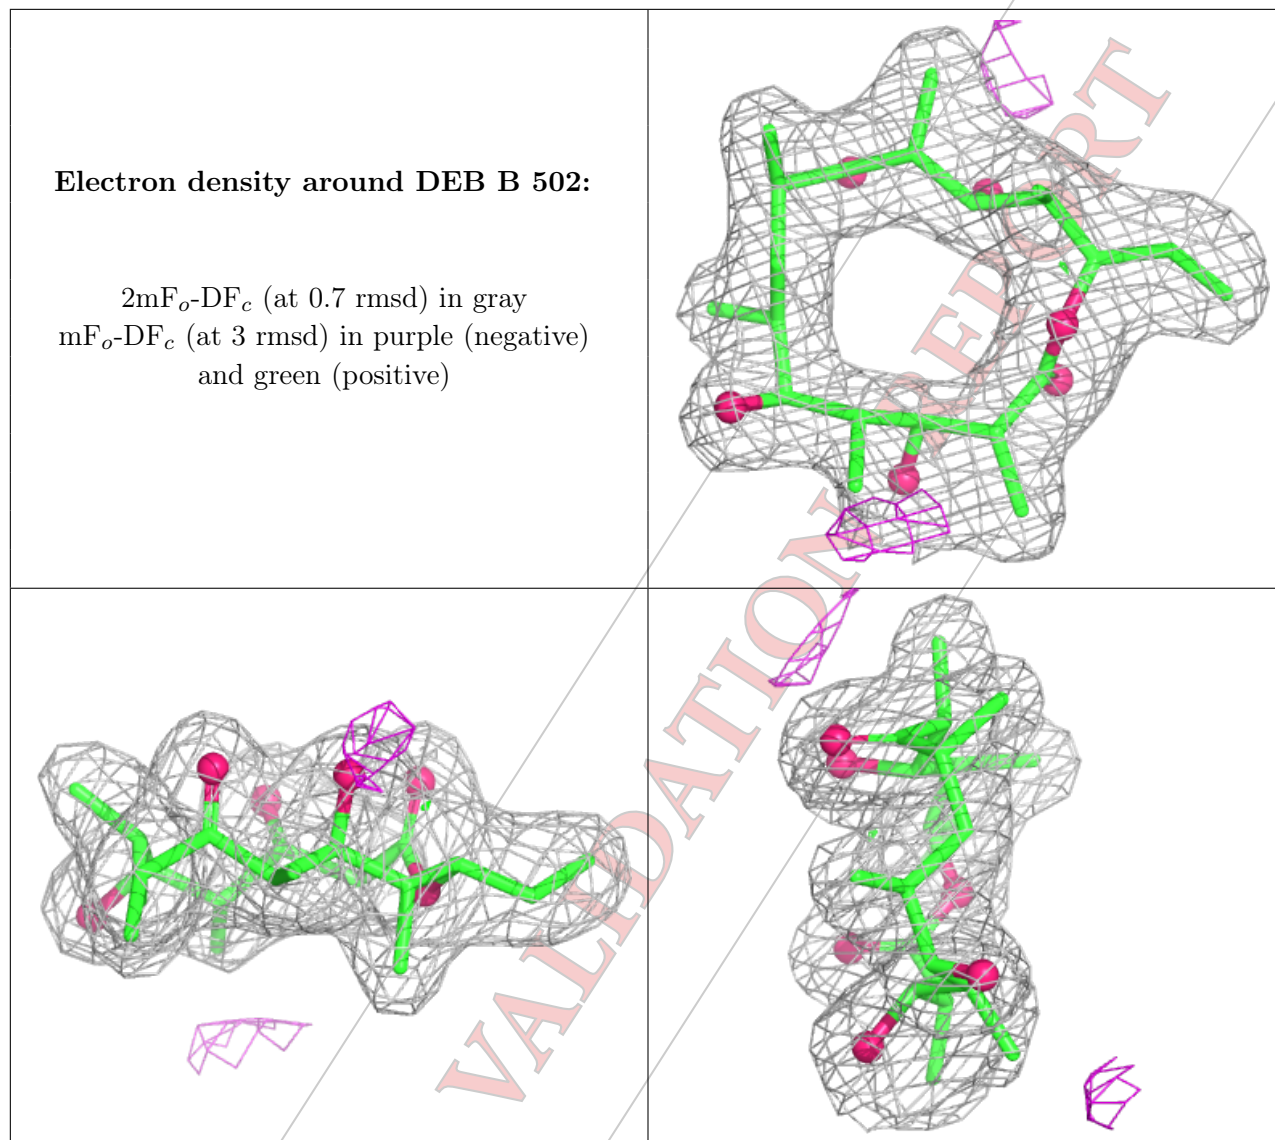

**Electron density around HEM D 501:**

$2mF_o-DF_c$  (at 0.7 rmsd) in gray  
 $mF_o-DF_c$  (at 3 rmsd) in purple (negative)  
and green (positive)

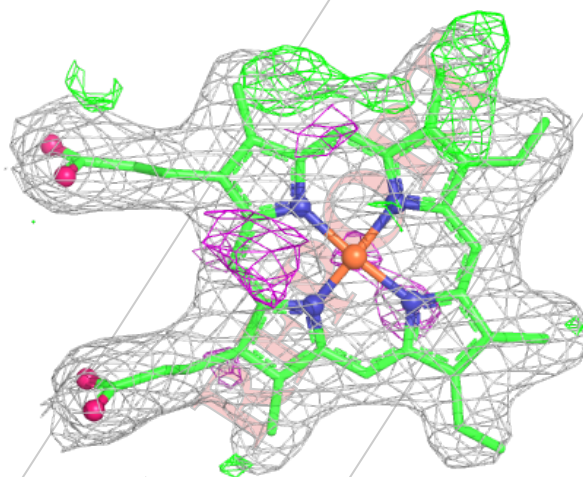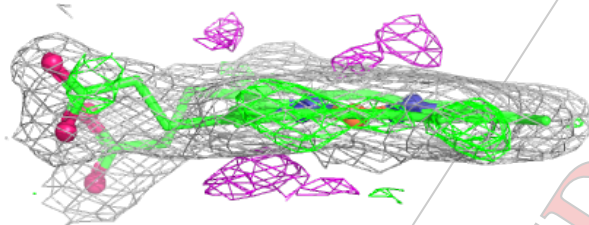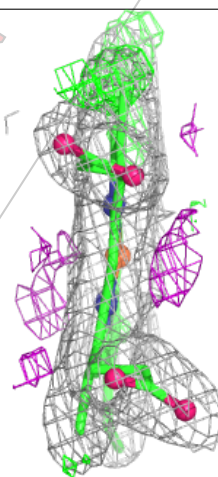

**Electron density around HEM B 501:**

$2mF_o-DF_c$  (at 0.7 rmsd) in gray  
 $mF_o-DF_c$  (at 3 rmsd) in purple (negative)  
and green (positive)

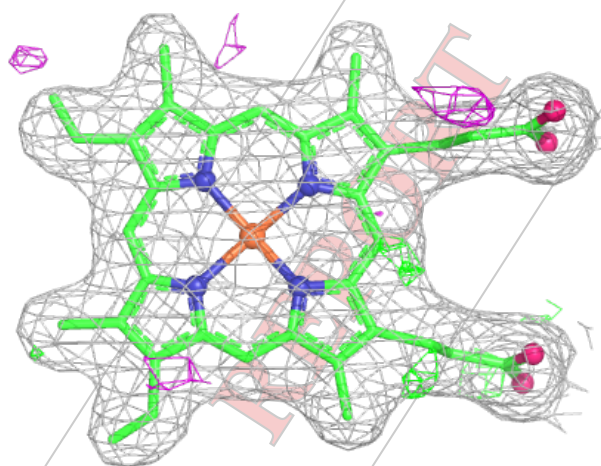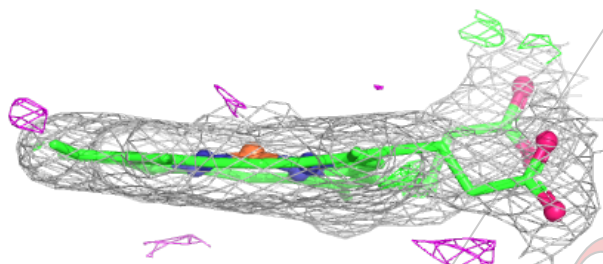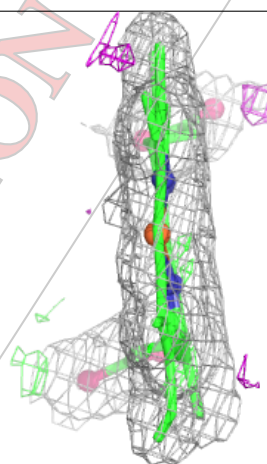



**Electron density around HEM A 501:**

$2mF_o-DF_c$  (at 0.7 rmsd) in gray  
 $mF_o-DF_c$  (at 3 rmsd) in purple (negative)  
and green (positive)

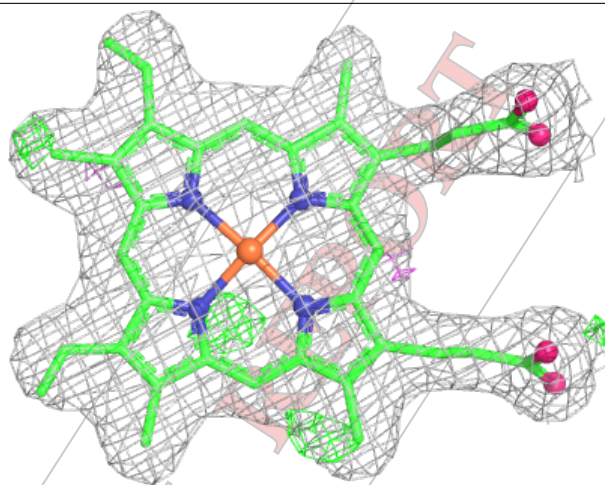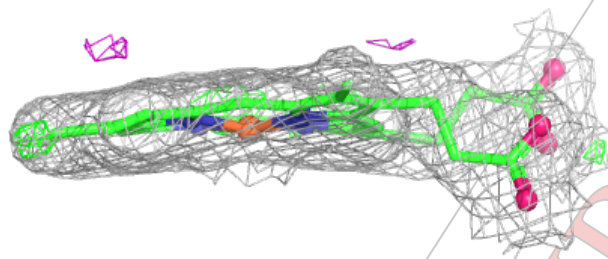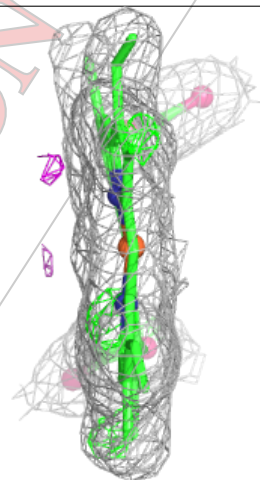

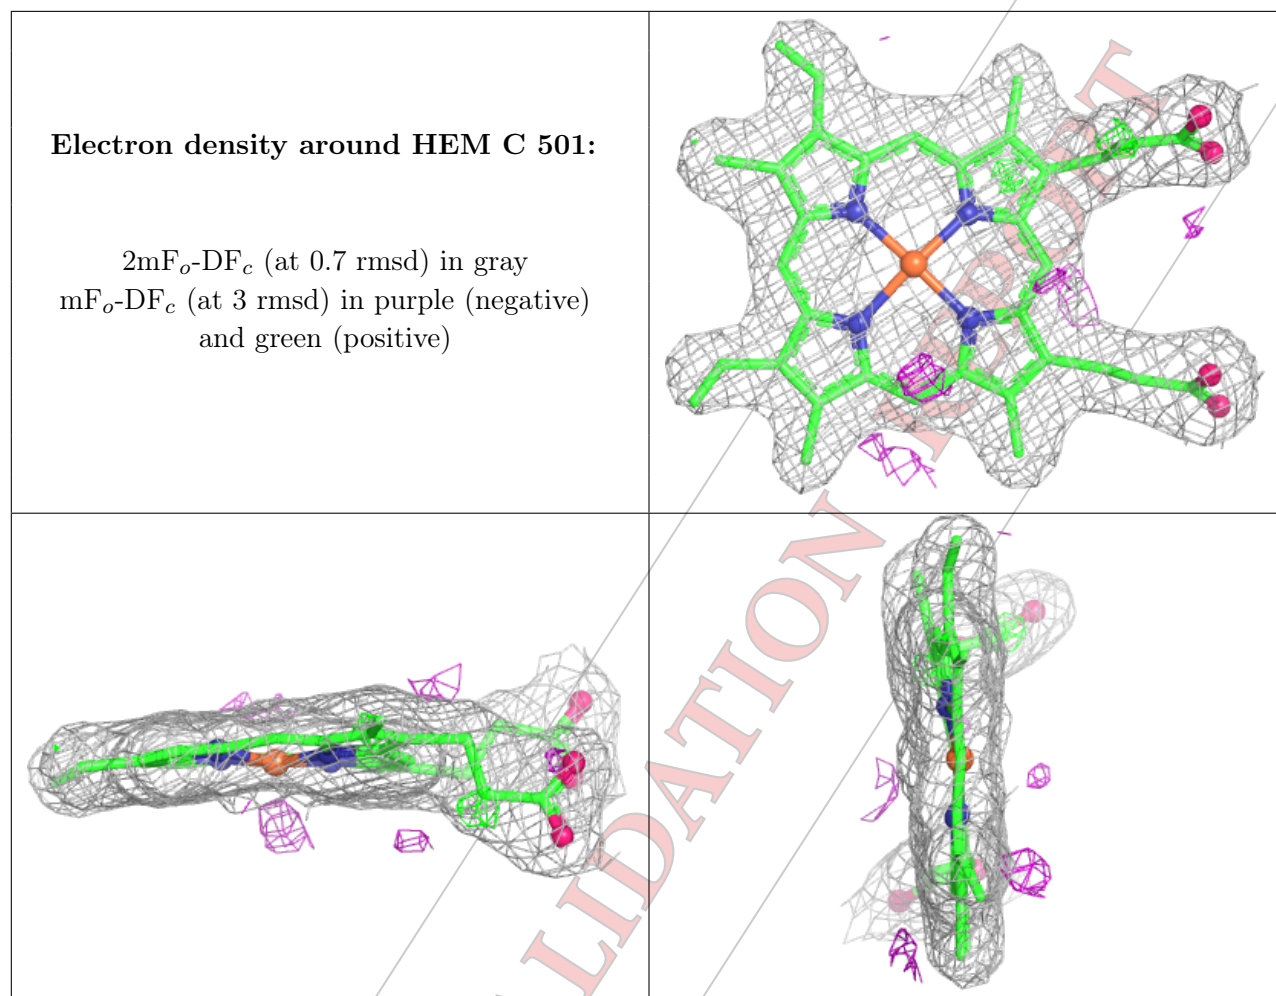

## 6.5 Other polymers [i](#)

There are no such residues in this entry.
